# Supplementary material
Source: MDPI journal article supplement (https://www.mdpi.com/2073-4360/5/2/418)

# checkCIF/PLATON report

You have not supplied any structure factors. As a result the full set of tests cannot be run.

No syntax errors found.      CIF dictionary      Interpreting this report

## Datablock: 01

---

Bond precision:    C-C = 0.0140 Å

Wavelength=0.71073

Cell:                a=17.267(6)                b=17.380(6)                c=18.306(10)  
                      alpha=102.659(5)        beta=103.677(5)        gamma=110.207(3)  
Temperature:        223 K

|                | Calculated                            | Reported                                      |
|----------------|---------------------------------------|-----------------------------------------------|
| Volume         | 4729(3)                               | 4729(3)                                       |
| Space group    | P -1                                  | P -1                                          |
| Hall group     | -P 1                                  | -P 1                                          |
| Moiety formula | C42 H42 La2 N28 O26, 2(Cl4 Cu), 2(Cl) | C42 H66 La2 N28 O26, 2(Cu Cl4), 2Cl, 28(H2 O) |
| Sum formula    | C42 H42 Cl10 Cu2 La2 N28 O26          | C42 H122 Cl10 Cu2 La2 N28 O54                 |
| Mr             | 2114.46                               | 2643.08                                       |
| Dx,g cm-3      | 1.485                                 | 1.856                                         |
| Z              | 2                                     | 2                                             |
| Mu (mm-1)      | 1.685                                 | 1.726                                         |
| F000           | 2080.0                                | 2688.0                                        |
| F000'          | 2083.84                               |                                               |
| h,k,lmax       | 20,20,21                              | 20,20,21                                      |
| Nref           | 16673                                 | 16672                                         |
| Tmin,Tmax      | 0.634,0.696                           | 0.653,0.713                                   |
| Tmin'          | 0.621                                 |                                               |

Correction method= MULTI-SCAN

Data completeness= 1.000

Theta(max)= 25.000

R(reflections)= 0.0749( 9307)

wR2(reflections)= 0.2528( 15597)

S = 1.004

Npar= 991

---

The following ALERTS were generated. Each ALERT has the format

**test-name\_ALERT\_alert-type\_alert-level.**

Click on the hyperlinks for more details of the test.

---

### Alert level A

CHEMW03\_ALERT\_2\_A ALERT: The ratio of given/expected molecular weight as

calculated from the \_atom\_site\* data lies outside  
the range 0.90 <> 1.10

From the CIF: \_cell\_formula\_units\_Z 2

From the CIF: \_chemical\_formula\_weight 2643.08

TEST: Calculate formula weight from \_atom\_site\_\*

| atom | mass   | num   | sum    |
|------|--------|-------|--------|
| C    | 12.01  | 42.00 | 504.46 |
| H    | 1.01   | 42.00 | 42.34  |
| N    | 14.01  | 28.00 | 392.20 |
| O    | 16.00  | 26.00 | 415.97 |
| Cl   | 35.45  | 10.00 | 354.53 |
| Cu   | 63.55  | 2.00  | 127.09 |
| La   | 138.91 | 2.00  | 277.81 |

Calculated formula weight 2114.40

PLAT029\_ALERT\_3\_A \_diffn\_measured\_fraction\_theta\_full Low ..... 0.936

### Alert level C

RFACR01\_ALERT\_3\_C The value of the weighted R factor is > 0.25

Weighted R factor given 0.253

PLAT041\_ALERT\_1\_C Calc. and Reported SumFormula Strings Differ ?

PLAT051\_ALERT\_1\_C Mu(calc) and Mu(CIF) Ratio Differs from 1.0 by . 2.37 Perc.

PLAT068\_ALERT\_1\_C Reported F000 Differs from Calcd (or Missing)... ?

PLAT234\_ALERT\_4\_C Large Hirshfeld Difference O4 -- C19 .. 0.18 Ang.

PLAT234\_ALERT\_4\_C Large Hirshfeld Difference O14 -- C40 .. 0.17 Ang.

PLAT234\_ALERT\_4\_C Large Hirshfeld Difference N22 -- C33 .. 0.18 Ang.

PLAT242\_ALERT\_2\_C Check Low Ueq as Compared to Neighbors for La1

PLAT242\_ALERT\_2\_C Check Low Ueq as Compared to Neighbors for La2

PLAT244\_ALERT\_4\_C Low 'Solvent' Ueq as Compared to Neighbors of Cu1

PLAT244\_ALERT\_4\_C Low 'Solvent' Ueq as Compared to Neighbors of Cu2

PLAT250\_ALERT\_2\_C Large U3/U1 Ratio for Average U(i,j) Tensor .... 2.1

PLAT342\_ALERT\_3\_C Low Bond Precision on C-C Bonds ..... 0.0140 Ang

PLAT431\_ALERT\_2\_C Short Inter HL..A Contact Cl4 .. O8W . 3.11 Ang.

PLAT431\_ALERT\_2\_C Short Inter HL..A Contact Cl9 .. O2W . 3.09 Ang.

PLAT431\_ALERT\_2\_C Short Inter HL..A Contact Cl9 .. O4W . 3.16 Ang.

### Alert level G

FORMU01\_ALERT\_2\_G There is a discrepancy between the atom counts in the  
\_chemical\_formula\_sum and the formula from the \_atom\_site\* data.

Atom count from \_chemical\_formula\_sum: C42 H122 Cl10 Cu2 La2 N28 O54

Atom count from the \_atom\_site data: C42 H42 Cl10 Cu2 La2 N28 O26

CELLZ01\_ALERT\_1\_G Difference between formula and atom\_site contents detected.

CELLZ01\_ALERT\_1\_G ALERT: Large difference may be due to a  
symmetry error - see SYMMG tests

From the CIF: \_cell\_formula\_units\_Z 2

From the CIF: \_chemical\_formula\_sum C42 H122 Cl10 Cu2 La2 N28 O54

TEST: Compare cell contents of formula and atom\_site data

| atom | Z*formula | cif sites | diff   |
|------|-----------|-----------|--------|
| C    | 84.00     | 84.00     | 0.00   |
| H    | 244.00    | 84.00     | 160.00 |
| Cl   | 20.00     | 20.00     | 0.00   |
| Cu   | 4.00      | 4.00      | 0.00   |
| La   | 4.00      | 4.00      | 0.00   |
| N    | 56.00     | 56.00     | 0.00   |
| O    | 108.00    | 52.00     | 56.00  |

PLAT004\_ALERT\_5\_G Info: Polymeric Structure Found with Dimension . 1

PLAT005\_ALERT\_5\_G No \_iucr\_refine\_instructions\_details in the CIF ?

PLAT042\_ALERT\_1\_G Calc. and Reported MoietyFormula Strings Differ ?

PLAT044\_ALERT\_1\_G Calculated and Reported Dx Differ ..... ?

|                   |                                                    |      |
|-------------------|----------------------------------------------------|------|
| PLAT072_ALERT_2_G | SHELXL First Parameter in WGHT Unusually Large.    | 0.16 |
| PLAT194_ALERT_1_G | Missing _cell_measurement_reflms_used datum ....   | ?    |
| PLAT195_ALERT_1_G | Missing _cell_measurement_theta_max datum ....     | ?    |
| PLAT196_ALERT_1_G | Missing _cell_measurement_theta_min datum ....     | ?    |
| PLAT606_ALERT_4_G | VERY LARGE Solvent Accessible VOID(S) in Structure | !    |
| PLAT720_ALERT_4_G | Number of Unusual/Non-Standard Labels .....        | 2    |
| PLAT793_ALERT_4_G | The Model has Chirality at C2 (Verify) ....        | R    |
| PLAT793_ALERT_4_G | The Model has Chirality at C3 (Verify) ....        | S    |
| PLAT793_ALERT_4_G | The Model has Chirality at C8 (Verify) ....        | S    |
| PLAT793_ALERT_4_G | The Model has Chirality at C9 (Verify) ....        | R    |
| PLAT793_ALERT_4_G | The Model has Chirality at C14 (Verify) ....       | S    |
| PLAT793_ALERT_4_G | The Model has Chirality at C15 (Verify) ....       | S    |
| PLAT793_ALERT_4_G | The Model has Chirality at C20 (Verify) ....       | R    |
| PLAT793_ALERT_4_G | The Model has Chirality at C21 (Verify) ....       | S    |
| PLAT793_ALERT_4_G | The Model has Chirality at C26 (Verify) ....       | R    |
| PLAT793_ALERT_4_G | The Model has Chirality at C27 (Verify) ....       | S    |
| PLAT793_ALERT_4_G | The Model has Chirality at C32 (Verify) ....       | R    |
| PLAT793_ALERT_4_G | The Model has Chirality at C33 (Verify) ....       | S    |
| PLAT793_ALERT_4_G | The Model has Chirality at C38 (Verify) ....       | R    |
| PLAT793_ALERT_4_G | The Model has Chirality at C39 (Verify) ....       | S    |
| PLAT794_ALERT_5_G | Note: Tentative Bond Valency for La1 (III)         | 3.21 |
| PLAT794_ALERT_5_G | Note: Tentative Bond Valency for La2 (III)         | 3.28 |
| PLAT869_ALERT_4_G | ALERTS Related to the use of SQUEEZE Suppressed    | !    |

---

2 **ALERT level A** = Most likely a serious problem - resolve or explain  
 0 **ALERT level B** = A potentially serious problem, consider carefully  
 16 **ALERT level C** = Check. Ensure it is not caused by an omission or oversight  
 30 **ALERT level G** = General information/check it is not something unexpected

10 ALERT type 1 CIF construction/syntax error, inconsistent or missing data  
 9 ALERT type 2 Indicator that the structure model may be wrong or deficient  
 3 ALERT type 3 Indicator that the structure quality may be low  
 22 ALERT type 4 Improvement, methodology, query or suggestion  
 4 ALERT type 5 Informative message, check

---

## Datablock: 02

---

Bond precision: C-C = 0.0087 A

Wavelength=0.71073

Cell: a=17.2440(6) b=17.3617(6) c=18.1955(11)  
 alpha=102.902(2) beta=103.810(2) gamma=110.459(1)  
 Temperature: 223 K

|                | Calculated                            | Reported                                      |
|----------------|---------------------------------------|-----------------------------------------------|
| Volume         | 4666.2(4)                             | 4666.2(4)                                     |
| Space group    | P -1                                  | P -1                                          |
| Hall group     | -P 1                                  | -P 1                                          |
| Moiety formula | C42 H42 N28 Nd2 O26, 2(Cl4 Cu), 2(Cl) | C42 H66 Nd2 N28 O26, 2(Cu Cl4), 2Cl, 28(H2 O) |
| Sum formula    | C42 H42 Cl10 Cu2 N28 Nd2 O26          | C42 H122 Cl10 Cu2 N28 Nd2 O54                 |
| Mr             | 2125.12                               | 2653.74                                       |
| Dx,g cm-3      | 1.513                                 | 1.889                                         |
| Z              | 2                                     | 2                                             |
| Mu (mm-1)      | 1.905                                 | 1.946                                         |
| F000           | 2092.0                                | 2700.0                                        |
| F000'          | 2096.21                               |                                               |
| h,k,lmax       | 20,20,21                              | 20,20,21                                      |
| Nref           | 16636                                 | 16427                                         |
| Tmin,Tmax      | 0.552,0.591                           | 0.584,0.622                                   |
| Tmin'          | 0.542                                 |                                               |

Correction method= MULTI-SCAN

Data completeness= 0.987                      Theta(max)= 25.100

R(reflections)= 0.0529( 13482)              wR2(reflections)= 0.1756( 16427)

S = 1.110                                      Npar= 991

The following ALERTS were generated. Each ALERT has the format

**test-name\_ALERT\_alert-type\_alert-level.**

Click on the hyperlinks for more details of the test.

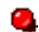

#### Alert level A

CHEMW03\_ALERT\_2\_A ALERT: The ratio of given/expected molecular weight as calculated from the \_atom\_site\* data lies outside the range 0.90 <> 1.10

From the CIF: \_cell\_formula\_units\_Z                                      2

From the CIF: \_chemical\_formula\_weight                                      2653.74

TEST: Calculate formula weight from \_atom\_site\_\*

| atom | mass   | num   | sum    |
|------|--------|-------|--------|
| C    | 12.01  | 42.00 | 504.46 |
| H    | 1.01   | 42.00 | 42.34  |
| N    | 14.01  | 28.00 | 392.20 |
| O    | 16.00  | 26.00 | 415.97 |
| Cl   | 35.45  | 10.00 | 354.53 |
| Nd   | 144.24 | 2.00  | 288.48 |
| Cu   | 63.55  | 2.00  | 127.09 |

Calculated formula weight                                      2125.07

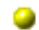

#### Alert level C

PLAT041\_ALERT\_1\_C Calc. and Reported SumFormula              Strings Differ              ?

PLAT051\_ALERT\_1\_C Mu(calc) and Mu(CIF) Ratio Differs from 1.0 by .              2.11 Perc.

```

PLAT068_ALERT_1_C Reported F000 Differs from Calcd (or Missing)...      ?
PLAT230_ALERT_2_C Hirshfeld Test Diff for      04      --  C19      ..      5.2 su
PLAT230_ALERT_2_C Hirshfeld Test Diff for      012     --  C28      ..      5.7 su
PLAT242_ALERT_2_C Check Low      Ueq as Compared to Neighbors for      Nd1
PLAT242_ALERT_2_C Check Low      Ueq as Compared to Neighbors for      Nd2
PLAT244_ALERT_4_C Low   'Solvent' Ueq as Compared to Neighbors of      Cu1
PLAT244_ALERT_4_C Low   'Solvent' Ueq as Compared to Neighbors of      Cu2
PLAT342_ALERT_3_C Low Bond Precision on C-C Bonds .....      0.0087 Ang
PLAT431_ALERT_2_C Short Inter HL..A Contact  C14      ..  O1W      .      3.13 Ang.
PLAT431_ALERT_2_C Short Inter HL..A Contact  C19      ..  O8W      .      3.11 Ang.

```

## Alert level G

```

FORMU01_ALERT_2_G There is a discrepancy between the atom counts in the
    _chemical_formula_sum and the formula from the _atom_site* data.
    Atom count from _chemical_formula_sum: C42 H122 Cl10 Cu2 N28 Nd2 O54
    Atom count from the _atom_site data:  C42 H42 Cl10 Cu2 N28 Nd2 O26
CELLZ01_ALERT_1_G Difference between formula and atom_site contents detected.
CELLZ01_ALERT_1_G ALERT: Large difference may be due to a
    symmetry error - see SYMMG tests
    From the CIF: _cell_formula_units_Z      2
    From the CIF: _chemical_formula_sum  C42 H122 Cl10 Cu2 N28 Nd2 O54
    TEST: Compare cell contents of formula and atom_site data

```

| atom | Z*formula | cif sites | diff   |
|------|-----------|-----------|--------|
| C    | 84.00     | 84.00     | 0.00   |
| H    | 244.00    | 84.00     | 160.00 |
| Cl   | 20.00     | 20.00     | 0.00   |
| Cu   | 4.00      | 4.00      | 0.00   |
| N    | 56.00     | 56.00     | 0.00   |
| Nd   | 4.00      | 4.00      | 0.00   |
| O    | 108.00    | 52.00     | 56.00  |

```

PLAT004_ALERT_5_G Info: Polymeric Structure Found with Dimension .      1
PLAT005_ALERT_5_G No _iucr_refine_instructions_details in the CIF      ?
PLAT042_ALERT_1_G Calc. and Reported MoietyFormula Strings Differ      ?
PLAT044_ALERT_1_G Calculated and Reported Dx Differ .....      ?
PLAT072_ALERT_2_G SHELXL First Parameter in WGHT Unusually Large.      0.11
PLAT083_ALERT_2_G SHELXL Second Parameter in WGHT Unusually Large.      5.45
PLAT194_ALERT_1_G Missing _cell_measurement_reflms_used datum ....      ?
PLAT195_ALERT_1_G Missing _cell_measurement_theta_max datum ....      ?
PLAT196_ALERT_1_G Missing _cell_measurement_theta_min datum ....      ?
PLAT606_ALERT_4_G VERY LARGE Solvent Accessible VOID(S) in Structure      !
PLAT793_ALERT_4_G The Model has Chirality at C2      (Verify) ....      R
PLAT793_ALERT_4_G The Model has Chirality at C3      (Verify) ....      S
PLAT793_ALERT_4_G The Model has Chirality at C8      (Verify) ....      S
PLAT793_ALERT_4_G The Model has Chirality at C9      (Verify) ....      R
PLAT793_ALERT_4_G The Model has Chirality at C14     (Verify) ....      S
PLAT793_ALERT_4_G The Model has Chirality at C15     (Verify) ....      R
PLAT793_ALERT_4_G The Model has Chirality at C20     (Verify) ....      S
PLAT793_ALERT_4_G The Model has Chirality at C21     (Verify) ....      R
PLAT793_ALERT_4_G The Model has Chirality at C26     (Verify) ....      R
PLAT793_ALERT_4_G The Model has Chirality at C27     (Verify) ....      S
PLAT793_ALERT_4_G The Model has Chirality at C32     (Verify) ....      R
PLAT793_ALERT_4_G The Model has Chirality at C33     (Verify) ....      S
PLAT793_ALERT_4_G The Model has Chirality at C38     (Verify) ....      R
PLAT793_ALERT_4_G The Model has Chirality at C39     (Verify) ....      S
PLAT869_ALERT_4_G ALERTS Related to the use of SQUEEZE Suppressed      !

```

- 
- 1 **ALERT level A** = Most likely a serious problem - resolve or explain  
 0 **ALERT level B** = A potentially serious problem, consider carefully  
 12 **ALERT level C** = Check. Ensure it is not caused by an omission or oversight

28 **ALERT level G** = General information/check it is not something unexpected

10 ALERT type 1 CIF construction/syntax error, inconsistent or missing data

10 ALERT type 2 Indicator that the structure model may be wrong or deficient

1 ALERT type 3 Indicator that the structure quality may be low

18 ALERT type 4 Improvement, methodology, query or suggestion

2 ALERT type 5 Informative message, check

---

## Datablock: 03

---

Bond precision: C-C = 0.0099 A Wavelength=0.71073

Cell: a=17.1376(9) b=17.4128(8) c=18.4104(9)  
alpha=103.314(2) beta=103.349(2) gamma=110.196(2)

Temperature: 223 K

|                | Calculated                            | Reported                                      |
|----------------|---------------------------------------|-----------------------------------------------|
| Volume         | 4718.9(4)                             | 4718.9(4)                                     |
| Space group    | P -1                                  | P -1                                          |
| Hall group     | -P 1                                  | -P 1                                          |
| Moiety formula | C42 H42 La2 N28 O26, Cl4<br>Co, 4(Cl) | C42 H66 La2 N28 O26, Co<br>Cl4, 4Cl, 31(H2 O) |
| Sum formula    | C42 H42 Cl8 Co La2 N28 O26            | C42 H128 Cl8 Co La2 N28<br>O57                |
| Mr             | 1975.39                               | 2558.07                                       |
| Dx,g cm-3      | 1.390                                 | 1.800                                         |
| Z              | 2                                     | 2                                             |
| Mu (mm-1)      | 1.362                                 | 1.407                                         |
| F000           | 1950.0                                | 2618.0                                        |
| F000'          | 1952.67                               |                                               |
| h,k,lmax       | 20,20,21                              | 20,20,21                                      |
| Nref           | 16812                                 | 16635                                         |
| Tmin,Tmax      | 0.653,0.703                           | 0.669,0.720                                   |
| Tmin'          | 0.640                                 |                                               |

Correction method= MULTI-SCAN

Data completeness= 0.989 Theta(max)= 25.100

R(reflections)= 0.0567( 11474) wR2(reflections)= 0.1782( 16635)

S = 0.923 Npar= 964

---

The following ALERTS were generated. Each ALERT has the format  
**test-name\_ALERT\_alert-type\_alert-level**.  
Click on the hyperlinks for more details of the test.

---

### 🔴 Alert level A

CHEMW03\_ALERT\_2\_A ALERT: The ratio of given/expected molecular weight as calculated from the \_atom\_site\* data lies outside the range 0.90 <> 1.10

From the CIF: \_cell\_formula\_units\_Z 2

From the CIF: \_chemical\_formula\_weight 2558.07

TEST: Calculate formula weight from \_atom\_site\*

| atom                      | mass   | num   | sum     |
|---------------------------|--------|-------|---------|
| C                         | 12.01  | 42.00 | 504.46  |
| H                         | 1.01   | 42.00 | 42.34   |
| N                         | 14.01  | 28.00 | 392.20  |
| O                         | 16.00  | 26.00 | 415.97  |
| Cl                        | 35.45  | 8.00  | 283.62  |
| Co                        | 58.93  | 1.00  | 58.93   |
| La                        | 138.91 | 2.00  | 277.81  |
| Calculated formula weight |        |       | 1975.34 |

### 🟡 Alert level C

PLAT041\_ALERT\_1\_C Calc. and Reported SumFormula Strings Differ ?  
PLAT051\_ALERT\_1\_C Mu(calc) and Mu(CIF) Ratio Differs from 1.0 by . 3.19 Perc.  
PLAT068\_ALERT\_1\_C Reported F000 Differs from Calcd (or Missing)... ?  
PLAT230\_ALERT\_2\_C Hirshfeld Test Diff for N21 -- C31 .. 6.0 su  
PLAT230\_ALERT\_2\_C Hirshfeld Test Diff for N22 -- C35 .. 5.6 su  
PLAT242\_ALERT\_2\_C Check Low Ueq as Compared to Neighbors for La1  
PLAT242\_ALERT\_2\_C Check Low Ueq as Compared to Neighbors for La2  
PLAT342\_ALERT\_3\_C Low Bond Precision on C-C Bonds ..... 0.0099 Ang  
PLAT431\_ALERT\_2\_C Short Inter HL..A Contact Cl2 .. O1W . 3.15 Ang.  
PLAT431\_ALERT\_2\_C Short Inter HL..A Contact Cl3 .. O8W . 3.14 Ang.  
PLAT431\_ALERT\_2\_C Short Inter HL..A Contact Cl5 .. O8W . 3.08 Ang.

### 🟢 Alert level G

FORMU01\_ALERT\_2\_G There is a discrepancy between the atom counts in the \_chemical\_formula\_sum and the formula from the \_atom\_site\* data.  
Atom count from \_chemical\_formula\_sum: C42 H128 Cl8 Co1 La2 N28 O57

Atom count from the \_atom\_site data: C42 H42 Cl8 Co1 La2 N28 O26

CELLZ01\_ALERT\_1\_G Difference between formula and atom\_site contents detected.

CELLZ01\_ALERT\_1\_G ALERT: Large difference may be due to a

symmetry error - see SYMMG tests

From the CIF: \_cell\_formula\_units\_Z 2

From the CIF: \_chemical\_formula\_sum C42 H128 Cl8 Co La2 N28 O57

TEST: Compare cell contents of formula and atom\_site data

| atom | Z*formula | cif sites | diff   |
|------|-----------|-----------|--------|
| C    | 84.00     | 84.00     | 0.00   |
| H    | 256.00    | 84.00     | 172.00 |
| Cl   | 16.00     | 16.00     | 0.00   |
| Co   | 2.00      | 2.00      | 0.00   |
| La   | 4.00      | 4.00      | 0.00   |
| N    | 56.00     | 56.00     | 0.00   |
| O    | 114.00    | 52.00     | 62.00  |

PLAT004\_ALERT\_5\_G Info: Polymeric Structure Found with Dimension . 1  
PLAT005\_ALERT\_5\_G No \_iucr\_refine\_instructions\_details in the CIF ?  
PLAT042\_ALERT\_1\_G Calc. and Reported MoietyFormula Strings Differ ?  
PLAT044\_ALERT\_1\_G Calculated and Reported Dx Differ ..... ?  
PLAT072\_ALERT\_2\_G SHELXL First Parameter in WGHT Unusually Large. 0.11  
PLAT154\_ALERT\_1\_G The su's on the Cell Angles are Equal ..... 0.00200 Deg.  
PLAT194\_ALERT\_1\_G Missing \_cell\_measurement\_reflms\_used datum .... ?  
PLAT195\_ALERT\_1\_G Missing \_cell\_measurement\_theta\_max datum .... ?  
PLAT196\_ALERT\_1\_G Missing \_cell\_measurement\_theta\_min datum .... ?

```

PLAT606_ALERT_4_G VERY LARGE Solvent Accessible VOID(S) in Structure      !
PLAT793_ALERT_4_G The Model has Chirality at C2      (Verify) ....      S
PLAT793_ALERT_4_G The Model has Chirality at C3      (Verify) ....      R
PLAT793_ALERT_4_G The Model has Chirality at C8      (Verify) ....      S
PLAT793_ALERT_4_G The Model has Chirality at C9      (Verify) ....      R
PLAT793_ALERT_4_G The Model has Chirality at C14     (Verify) ....      S
PLAT793_ALERT_4_G The Model has Chirality at C15     (Verify) ....      S
PLAT793_ALERT_4_G The Model has Chirality at C20     (Verify) ....      R
PLAT793_ALERT_4_G The Model has Chirality at C21     (Verify) ....      S
PLAT793_ALERT_4_G The Model has Chirality at C26     (Verify) ....      S
PLAT793_ALERT_4_G The Model has Chirality at C27     (Verify) ....      R
PLAT793_ALERT_4_G The Model has Chirality at C32     (Verify) ....      S
PLAT793_ALERT_4_G The Model has Chirality at C33     (Verify) ....      R
PLAT793_ALERT_4_G The Model has Chirality at C38     (Verify) ....      R
PLAT793_ALERT_4_G The Model has Chirality at C39     (Verify) ....      S
PLAT794_ALERT_5_G Note: Tentative Bond Valency for La1      (III)      3.26
PLAT794_ALERT_5_G Note: Tentative Bond Valency for La2      (III)      3.29
PLAT869_ALERT_4_G ALERTS Related to the use of SQUEEZE Suppressed      !

```

---

```

1 ALERT level A = Most likely a serious problem - resolve or explain
0 ALERT level B = A potentially serious problem, consider carefully
11 ALERT level C = Check. Ensure it is not caused by an omission or oversight
30 ALERT level G = General information/check it is not something unexpected

```

```

11 ALERT type 1 CIF construction/syntax error, inconsistent or missing data
10 ALERT type 2 Indicator that the structure model may be wrong or deficient
1 ALERT type 3 Indicator that the structure quality may be low
16 ALERT type 4 Improvement, methodology, query or suggestion
4 ALERT type 5 Informative message, check

```

---

## Datablock: 04

---

Bond precision: C-C = 0.0086 A

Wavelength=0.71073

Cell: a=17.0773(11) b=17.3435(11) c=18.243(2)  
alpha=103.410(3) beta=103.249(3) gamma=110.144(2)  
Temperature: 223 K



|                | Calculated                            | Reported                                      |
|----------------|---------------------------------------|-----------------------------------------------|
| Volume         | 4643.3(7)                             | 4643.2(7)                                     |
| Space group    | P -1                                  | P -1                                          |
| Hall group     | -P 1                                  | -P 1                                          |
| Moiety formula | C42 H42 Ce2 N28 O26, Cl4<br>Co, 4(Cl) | C42 H66 Ce2 N28 O26, Co<br>Cl4, 4Cl, 26(H2 O) |
| Sum formula    | C42 H42 Ce2 Cl8 Co N28 O26            | C42 H118 Ce2 Cl8 Co N28<br>O52                |
| Mr             | 1977.81                               | 2470.41                                       |
| Dx,g cm-3      | 1.415                                 | 1.767                                         |
| Z              | 2                                     | 2                                             |
| Mu (mm-1)      | 1.445                                 | 1.483                                         |
| F000           | 1954.0                                | 2522.0                                        |
| F000'          | 1956.82                               |                                               |
| h,k,lmax       | 20,20,21                              | 20,20,21                                      |
| Nref           | 16726                                 | 16543                                         |
| Tmin,Tmax      | 0.610,0.650                           | 0.632,0.673                                   |
| Tmin'          | 0.598                                 |                                               |

Correction method= MULTI-SCAN

Data completeness= 0.989

Theta(max)= 25.200

R(reflections)= 0.0499( 12136)

wR2(reflections)= 0.1568( 16543)

S = 1.027

Npar= 964

The following ALERTS were generated. Each ALERT has the format

**test-name\_ALERT\_alert-type\_alert-level.**

Click on the hyperlinks for more details of the test.



#### Alert level A

CHEMW03\_ALERT\_2\_A ALERT: The ratio of given/expected molecular weight as calculated from the \_atom\_site\* data lies outside the range 0.90 <> 1.10

From the CIF: \_cell\_formula\_units\_Z 2

From the CIF: \_chemical\_formula\_weight 2470.41

TEST: Calculate formula weight from \_atom\_site\_\*

| atom | mass   | num   | sum    |
|------|--------|-------|--------|
| C    | 12.01  | 42.00 | 504.46 |
| H    | 1.01   | 42.00 | 42.34  |
| N    | 14.01  | 28.00 | 392.20 |
| O    | 16.00  | 26.00 | 415.97 |
| Cl   | 35.45  | 8.00  | 283.62 |
| Ce   | 140.12 | 2.00  | 280.24 |
| Co   | 58.93  | 1.00  | 58.93  |

Calculated formula weight 1977.76



#### Alert level C

PLAT041\_ALERT\_1\_C Calc. and Reported SumFormula Strings Differ ?

PLAT051\_ALERT\_1\_C Mu(calc) and Mu(CIF) Ratio Differs from 1.0 by . 2.59 Perc.

|                   |                                                  |            |
|-------------------|--------------------------------------------------|------------|
| PLAT068_ALERT_1_C | Reported F000 Differs from Calcd (or Missing)... | ?          |
| PLAT242_ALERT_2_C | Check Low Ueq as Compared to Neighbors for       | Ce1        |
| PLAT242_ALERT_2_C | Check Low Ueq as Compared to Neighbors for       | Ce2        |
| PLAT342_ALERT_3_C | Low Bond Precision on C-C Bonds .....            | 0.0086 Ang |
| PLAT431_ALERT_2_C | Short Inter HL..A Contact Cl2 .. O8W .           | 3.13 Ang.  |
| PLAT431_ALERT_2_C | Short Inter HL..A Contact Cl3 .. O1W .           | 3.15 Ang.  |
| PLAT431_ALERT_2_C | Short Inter HL..A Contact Cl5 .. O8W .           | 3.12 Ang.  |
| PLAT431_ALERT_2_C | Short Inter HL..A Contact Cl6 .. O6W .           | 3.01 Ang.  |
| PLAT431_ALERT_2_C | Short Inter HL..A Contact Cl6 .. O10W .          | 3.04 Ang.  |
| PLAT431_ALERT_2_C | Short Inter HL..A Contact Cl8 .. O1W .           | 3.16 Ang.  |

## ● Alert level G

FORMU01\_ALERT\_2\_G There is a discrepancy between the atom counts in the  
     \_chemical\_formula\_sum and the formula from the \_atom\_site\* data.  
     Atom count from \_chemical\_formula\_sum: C42 H118 Ce2 Cl8 Co1 N28 O52  
     Atom count from the \_atom\_site data: C42 H42 Ce2 Cl8 Co1 N28 O26

CELLZ01\_ALERT\_1\_G Difference between formula and atom\_site contents detected.  
 CELLZ01\_ALERT\_1\_G ALERT: Large difference may be due to a  
     symmetry error - see SYMMG tests  
     From the CIF: \_cell\_formula\_units\_Z 2  
     From the CIF: \_chemical\_formula\_sum C42 H118 Ce2 Cl8 Co N28 O52  
     TEST: Compare cell contents of formula and atom\_site data

| atom | Z*formula | cif sites | diff   |
|------|-----------|-----------|--------|
| C    | 84.00     | 84.00     | 0.00   |
| H    | 236.00    | 84.00     | 152.00 |
| Ce   | 4.00      | 4.00      | 0.00   |
| Cl   | 16.00     | 16.00     | 0.00   |
| Co   | 2.00      | 2.00      | 0.00   |
| N    | 56.00     | 56.00     | 0.00   |
| O    | 104.00    | 52.00     | 52.00  |

|                   |                                                    |   |
|-------------------|----------------------------------------------------|---|
| PLAT004_ALERT_5_G | Info: Polymeric Structure Found with Dimension .   | 1 |
| PLAT005_ALERT_5_G | No _iucr_refine_instructions_details in the CIF    | ? |
| PLAT042_ALERT_1_G | Calc. and Reported MoietyFormula Strings Differ    | ? |
| PLAT044_ALERT_1_G | Calculated and Reported Dx Differ .....            | ? |
| PLAT194_ALERT_1_G | Missing _cell_measurement_reflms_used datum ....   | ? |
| PLAT195_ALERT_1_G | Missing _cell_measurement_theta_max datum ....     | ? |
| PLAT196_ALERT_1_G | Missing _cell_measurement_theta_min datum ....     | ? |
| PLAT606_ALERT_4_G | VERY LARGE Solvent Accessible VOID(S) in Structure | ! |
| PLAT790_ALERT_4_G | Centre of Gravity not Within Unit Cell: Resd. #    | 3 |
|                   | Cl                                                 |   |
| PLAT790_ALERT_4_G | Centre of Gravity not Within Unit Cell: Resd. #    | 4 |
|                   | Cl                                                 |   |
| PLAT790_ALERT_4_G | Centre of Gravity not Within Unit Cell: Resd. #    | 6 |
|                   | Cl                                                 |   |
| PLAT793_ALERT_4_G | The Model has Chirality at C2 (Verify) ....        | S |
| PLAT793_ALERT_4_G | The Model has Chirality at C3 (Verify) ....        | R |
| PLAT793_ALERT_4_G | The Model has Chirality at C8 (Verify) ....        | R |
| PLAT793_ALERT_4_G | The Model has Chirality at C9 (Verify) ....        | S |
| PLAT793_ALERT_4_G | The Model has Chirality at C14 (Verify) ....       | S |
| PLAT793_ALERT_4_G | The Model has Chirality at C15 (Verify) ....       | R |
| PLAT793_ALERT_4_G | The Model has Chirality at C20 (Verify) ....       | S |
| PLAT793_ALERT_4_G | The Model has Chirality at C21 (Verify) ....       | R |
| PLAT793_ALERT_4_G | The Model has Chirality at C26 (Verify) ....       | R |
| PLAT793_ALERT_4_G | The Model has Chirality at C27 (Verify) ....       | S |
| PLAT793_ALERT_4_G | The Model has Chirality at C32 (Verify) ....       | R |
| PLAT793_ALERT_4_G | The Model has Chirality at C33 (Verify) ....       | R |
| PLAT793_ALERT_4_G | The Model has Chirality at C38 (Verify) ....       | S |
| PLAT793_ALERT_4_G | The Model has Chirality at C39 (Verify) ....       | R |
| PLAT869_ALERT_4_G | ALERTS Related to the use of SQUEEZE Suppressed    | ! |

---

1 **ALERT level A** = Most likely a serious problem - resolve or explain  
0 **ALERT level B** = A potentially serious problem, consider carefully  
12 **ALERT level C** = Check. Ensure it is not caused by an omission or oversight  
29 **ALERT level G** = General information/check it is not something unexpected

10 ALERT type 1 CIF construction/syntax error, inconsistent or missing data  
10 ALERT type 2 Indicator that the structure model may be wrong or deficient  
1 ALERT type 3 Indicator that the structure quality may be low  
19 ALERT type 4 Improvement, methodology, query or suggestion  
2 ALERT type 5 Informative message, check

---

## Datablock: 05

---

Bond precision: C-C = 0.0129 A                      Wavelength=0.71073

Cell:                      a=17.0566(17)              b=17.1421(17)              c=20.041(3)  
                            alpha=97.415(5)              beta=112.647(5)              gamma=111.089(4)

Temperature: 323 K

|                | Calculated                                         | Reported                                      |
|----------------|----------------------------------------------------|-----------------------------------------------|
| Volume         | 4795.8(10)                                         | 4795.8(10)                                    |
| Space group    | P -1                                               | P -1                                          |
| Hall group     | -P 1                                               | -P 1                                          |
| Moiety formula | C42 H42 Eu2 N28 O24, Cl4<br>Cu, 4(Cl0.50), 0.5(Cl) | C42 H62 Eu2 N28 O24, Cu<br>Cl4, 4Cl, 39(H2 O) |
| Sum formula    | C42 H42 Cl8 Cu Eu2 N28 O24                         | C42 H140 Cl8 Cu Eu2 N28<br>O63                |
| Mr             | 1974.13                                            | 2696.88                                       |
| Dx,g cm-3      | 1.367                                              | 1.868                                         |
| Z              | 2                                                  | 2                                             |
| Mu (mm-1)      | 1.803                                              | 1.859                                         |
| F000           | 1946.0                                             | 2766.0                                        |
| F000'          | 1949.09                                            |                                               |
| h,k,lmax       | 20,20,23                                           | 20,20,23                                      |
| Nref           | 17091                                              | 16826                                         |
| Tmin,Tmax      | 0.691,0.757                                        | 0.674,0.768                                   |
| Tmin'          | 0.646                                              |                                               |

Correction method= MULTI-SCAN

Data completeness= 0.984                      Theta(max)= 25.100

R(reflections)= 0.0822( 13121)              wR2(reflections)= 0.2455( 16826)

S = 1.125                      Npar= 932

---

The following ALERTS were generated. Each ALERT has the format

**test-name\_ALERT\_alert-type\_alert-level.**

Click on the hyperlinks for more details of the test.

---

### Alert level A

CHEMW03\_ALERT\_2\_A ALERT: The ratio of given/expected molecular weight as calculated from the `_atom_site*` data lies outside the range 0.90 <> 1.10

From the CIF: `_cell_formula_units_Z` 2

From the CIF: `_chemical_formula_weight` 2696.88

TEST: Calculate formula weight from `_atom_site_*`

| atom | mass   | num   | sum    |
|------|--------|-------|--------|
| C    | 12.01  | 42.00 | 504.46 |
| H    | 1.01   | 42.00 | 42.34  |
| N    | 14.01  | 28.00 | 392.20 |
| O    | 16.00  | 24.00 | 383.98 |
| Cl   | 35.45  | 8.00  | 283.62 |
| Eu   | 151.96 | 2.00  | 303.92 |
| Cu   | 63.55  | 1.00  | 63.55  |

Calculated formula weight 1974.06

---

### Alert level C

PLAT041\_ALERT\_1\_C Calc. and Reported SumFormula Strings Differ ?

PLAT051\_ALERT\_1\_C Mu(calc) and Mu(CIF) Ratio Differs from 1.0 by . 2.99 Perc.

PLAT068\_ALERT\_1\_C Reported F000 Differs from Calcd (or Missing)... ?

PLAT094\_ALERT\_2\_C Ratio of Maximum / Minimum Residual Density .... 2.63

PLAT213\_ALERT\_2\_C Atom Cl2 has ADP max/min Ratio ..... 3.3 oblat

PLAT230\_ALERT\_2\_C Hirshfeld Test Diff for O1 -- Cl .. 5.3 su

PLAT230\_ALERT\_2\_C Hirshfeld Test Diff for N20 -- C30 .. 7.0 su

PLAT242\_ALERT\_2\_C Check Low Ueq as Compared to Neighbors for Eu1

PLAT242\_ALERT\_2\_C Check Low Ueq as Compared to Neighbors for Eu2

PLAT244\_ALERT\_4\_C Low 'Solvent' Ueq as Compared to Neighbors of Cu1

PLAT342\_ALERT\_3\_C Low Bond Precision on C-C Bonds ..... 0.0129 Ang

PLAT431\_ALERT\_2\_C Short Inter HL..A Contact Cl5 .. O1W . 3.11 Ang.

PLAT431\_ALERT\_2\_C Short Inter HL..A Contact Cl6 .. O10W . 2.98 Ang.

PLAT431\_ALERT\_2\_C Short Inter HL..A Contact Cl7 .. O5W . 3.11 Ang.

PLAT790\_ALERT\_4\_C Centre of Gravity not Within Unit Cell: Resd. # 1

C42 H42 Eu2 N28 O24

---

### Alert level G

FORMU01\_ALERT\_2\_G There is a discrepancy between the atom counts in the `_chemical_formula_sum` and the formula from the `_atom_site*` data.

Atom count from `_chemical_formula_sum`: C42 H140 Cl8 Cu1 Eu2 N28 O63

Atom count from the `_atom_site` data: C42 H42 Cl8 Cu1 Eu2 N28 O24

CELLZ01\_ALERT\_1\_G Difference between formula and `_atom_site` contents detected.

CELLZ01\_ALERT\_1\_G ALERT: Large difference may be due to a

symmetry error - see SYMMG tests

From the CIF: `_cell_formula_units_Z` 2

From the CIF: `_chemical_formula_sum` C42 H140 Cl8 Cu Eu2 N28 O63

TEST: Compare cell contents of formula and `_atom_site` data

| atom | Z*formula | cif sites | diff   |
|------|-----------|-----------|--------|
| C    | 84.00     | 84.00     | 0.00   |
| H    | 280.00    | 84.00     | 196.00 |
| Cl   | 16.00     | 16.00     | 0.00   |
| Cu   | 2.00      | 2.00      | 0.00   |
| Eu   | 4.00      | 4.00      | 0.00   |
| N    | 56.00     | 56.00     | 0.00   |

|                   |                                                    |       |       |           |
|-------------------|----------------------------------------------------|-------|-------|-----------|
| O                 | 126.00                                             | 48.00 | 78.00 |           |
| PLAT002_ALERT_2_G | Number of Distance or Angle Restraints on AtSite   |       |       | 4         |
| PLAT003_ALERT_2_G | Number of Uiso or Uij Restrained Atom Sites ....   |       |       | 2         |
| PLAT004_ALERT_5_G | Info: Polymeric Structure Found with Dimension .   |       |       | 1         |
| PLAT005_ALERT_5_G | No _iucr_refine_instructions_details in the CIF    |       |       | ?         |
| PLAT042_ALERT_1_G | Calc. and Reported MoietyFormula Strings Differ    |       |       | ?         |
| PLAT044_ALERT_1_G | Calculated and Reported Dx Differ .....            |       |       | ?         |
| PLAT072_ALERT_2_G | SHELXL First Parameter in WGHT Unusually Large.    |       |       | 0.16      |
| PLAT194_ALERT_1_G | Missing _cell_measurement_reflms_used datum ....   |       |       | ?         |
| PLAT195_ALERT_1_G | Missing _cell_measurement_theta_max datum ....     |       |       | ?         |
| PLAT196_ALERT_1_G | Missing _cell_measurement_theta_min datum ....     |       |       | ?         |
| PLAT302_ALERT_4_G | Note: Anion/Solvent Disorder .....                 |       |       | 11 Perc.  |
| PLAT434_ALERT_2_G | Short Inter HL..HL Contact Cl1 .. Cl9 .            |       |       | 3.18 Ang. |
| PLAT434_ALERT_2_G | Short Inter HL..HL Contact Cl3 .. Cl9 .            |       |       | 3.33 Ang. |
| PLAT434_ALERT_2_G | Short Inter HL..HL Contact Cl6 .. Cl6 .            |       |       | 3.27 Ang. |
| PLAT606_ALERT_4_G | VERY LARGE Solvent Accessible VOID(S) in Structure |       |       | !         |
| PLAT790_ALERT_4_G | Centre of Gravity not Within Unit Cell: Resd. #    |       |       | 2         |
|                   | Cl4 Cu                                             |       |       |           |
| PLAT790_ALERT_4_G | Centre of Gravity not Within Unit Cell: Resd. #    |       |       | 3         |
|                   | Cl                                                 |       |       |           |
| PLAT790_ALERT_4_G | Centre of Gravity not Within Unit Cell: Resd. #    |       |       | 4         |
|                   | Cl                                                 |       |       |           |
| PLAT790_ALERT_4_G | Centre of Gravity not Within Unit Cell: Resd. #    |       |       | 5         |
|                   | Cl                                                 |       |       |           |
| PLAT790_ALERT_4_G | Centre of Gravity not Within Unit Cell: Resd. #    |       |       | 6         |
|                   | Cl                                                 |       |       |           |
| PLAT790_ALERT_4_G | Centre of Gravity not Within Unit Cell: Resd. #    |       |       | 7         |
|                   | Cl0.50                                             |       |       |           |
| PLAT793_ALERT_4_G | The Model has Chirality at C2 (Verify) ....        |       |       | S         |
| PLAT793_ALERT_4_G | The Model has Chirality at C3 (Verify) ....        |       |       | R         |
| PLAT793_ALERT_4_G | The Model has Chirality at C15 (Verify) ....       |       |       | S         |
| PLAT793_ALERT_4_G | The Model has Chirality at C20 (Verify) ....       |       |       | S         |
| PLAT793_ALERT_4_G | The Model has Chirality at C32 (Verify) ....       |       |       | R         |
| PLAT793_ALERT_4_G | The Model has Chirality at C33 (Verify) ....       |       |       | S         |
| PLAT793_ALERT_4_G | The Model has Chirality at C38 (Verify) ....       |       |       | S         |
| PLAT793_ALERT_4_G | The Model has Chirality at C39 (Verify) ....       |       |       | S         |
| PLAT860_ALERT_3_G | Note: Number of Least-Squares Restraints .....     |       |       | 14        |
| PLAT869_ALERT_4_G | ALERTS Related to the use of SQUEEZE Suppressed    |       |       | !         |

---

1 **ALERT level A** = Most likely a serious problem - resolve or explain  
 0 **ALERT level B** = A potentially serious problem, consider carefully  
 15 **ALERT level C** = Check. Ensure it is not caused by an omission or oversight  
 34 **ALERT level G** = General information/check it is not something unexpected

10 ALERT type 1 CIF construction/syntax error, inconsistent or missing data  
 17 ALERT type 2 Indicator that the structure model may be wrong or deficient  
 2 ALERT type 3 Indicator that the structure quality may be low  
 19 ALERT type 4 Improvement, methodology, query or suggestion  
 2 ALERT type 5 Informative message, check

---

## Datablock: 06

---

Bond precision: C-C = 0.0167 A

Wavelength=0.71073

Cell: a=17.045(4) b=17.080(4) c=19.983(7)  
 alpha=112.825(11) beta=96.852(11) gamma=111.574(8)  
 Temperature: 223 K

|                | Calculated                                            | Reported                                      |
|----------------|-------------------------------------------------------|-----------------------------------------------|
| Volume         | 4748(2)                                               | 4748(2)                                       |
| Space group    | P -1                                                  | P -1                                          |
| Hall group     | -P 1                                                  | -P 1                                          |
| Moiety formula | C42 H42 Gd2 N28 O24, Cl4<br>Cu, 2.75(Cl0.50), 1.5(Cl) | C42 H62 Gd2 N28 O24, Cu<br>Cl4, 4Cl, 43(H2 O) |
| Sum formula    | C42 H42 Cl8 Cu Gd2 N28 O24                            | C42 H148 Cl8 Cu Gd2 N28<br>O67                |
| Mr             | 1984.69                                               | 2779.52                                       |
| Dx,g cm-3      | 1.388                                                 | 1.944                                         |
| Z              | 2                                                     | 2                                             |
| Mu (mm-1)      | 1.897                                                 | 1.959                                         |
| F000           | 1950.0                                                | 2850.0                                        |
| F000'          | 1953.05                                               |                                               |
| h,k,lmax       | 20,20,23                                              | 20,20,23                                      |
| Nref           | 17105                                                 | 16910                                         |
| Tmin,Tmax      | 0.662,0.731                                           | 0.673,0.745                                   |
| Tmin'          | 0.643                                                 |                                               |

Correction method= MULTI-SCAN

Data completeness= 0.989 Theta(max)= 25.200

R(reflections)= 0.1009( 12439) wR2(reflections)= 0.3035( 16910)

S = 1.155 Npar= 911

The following ALERTS were generated. Each ALERT has the format

**test-name\_ALERT\_alert-type\_alert-level.**

Click on the hyperlinks for more details of the test.

### Alert level A

CHEMW03\_ALERT\_2\_A ALERT: The ratio of given/expected molecular weight as  
 calculated from the \_atom\_site\* data lies outside  
 the range 0.90 <> 1.10

From the CIF: \_cell\_formula\_units\_Z 2

From the CIF: \_chemical\_formula\_weight 2779.52

TEST: Calculate formula weight from \_atom\_site\_\*

| atom | mass   | num   | sum    |
|------|--------|-------|--------|
| C    | 12.01  | 42.00 | 504.46 |
| H    | 1.01   | 42.00 | 42.34  |
| N    | 14.01  | 28.00 | 392.20 |
| O    | 16.00  | 24.00 | 383.98 |
| Cl   | 35.45  | 8.00  | 283.62 |
| Gd   | 157.25 | 2.00  | 314.50 |
| Cu   | 63.55  | 1.00  | 63.55  |

Calculated formula weight 1984.64

---

### ● Alert level C

RFACG01\_ALERT\_3\_C The value of the R factor is > 0.10  
R factor given 0.101

RFACR01\_ALERT\_3\_C The value of the weighted R factor is > 0.25  
Weighted R factor given 0.303

PLAT041\_ALERT\_1\_C Calc. and Reported SumFormula Strings Differ ?

PLAT051\_ALERT\_1\_C Mu(calc) and Mu(CIF) Ratio Differs from 1.0 by . 3.15 Perc.

PLAT068\_ALERT\_1\_C Reported F000 Differs from Calcd (or Missing)... ?

PLAT084\_ALERT\_2\_C High wR2 Value ..... 0.30

PLAT213\_ALERT\_2\_C Atom O9 has ADP max/min Ratio ..... 3.8 oblat

PLAT213\_ALERT\_2\_C Atom O10W has ADP max/min Ratio ..... 3.1 prola

PLAT230\_ALERT\_2\_C Hirshfeld Test Diff for O9 -- C1 .. 7.0 su

PLAT234\_ALERT\_4\_C Large Hirshfeld Difference O11 -- C31 .. 0.16 Ang.

PLAT242\_ALERT\_2\_C Check Low Ueq as Compared to Neighbors for Gd1

PLAT242\_ALERT\_2\_C Check Low Ueq as Compared to Neighbors for Gd2

PLAT244\_ALERT\_4\_C Low 'Solvent' Ueq as Compared to Neighbors of Cu1

PLAT250\_ALERT\_2\_C Large U3/U1 Ratio for Average U(i,j) Tensor .... 2.2

PLAT342\_ALERT\_3\_C Low Bond Precision on C-C Bonds ..... 0.0167 Ang

PLAT431\_ALERT\_2\_C Short Inter HL..A Contact Cl4 .. O6W . 3.16 Ang.

PLAT431\_ALERT\_2\_C Short Inter HL..A Contact Cl5 .. O6W . 3.08 Ang.

PLAT431\_ALERT\_2\_C Short Inter HL..A Contact Cl6 .. O9W . 3.06 Ang.

PLAT431\_ALERT\_2\_C Short Inter HL..A Contact Cl6 .. O9W . 3.06 Ang.

PLAT790\_ALERT\_4\_C Centre of Gravity not Within Unit Cell: Resd. # 1  
C42 H42 Gd2 N28 O24

---

### ● Alert level G

FORMU01\_ALERT\_2\_G There is a discrepancy between the atom counts in the  
\_chemical\_formula\_sum and the formula from the \_atom\_site\* data.  
Atom count from \_chemical\_formula\_sum: C42 H148 Cl8 Cu1 Gd2 N28 O67  
Atom count from the \_atom\_site data: C42 H42 Cl8 Cu1 Gd2 N28 O24

CELLZ01\_ALERT\_1\_G Difference between formula and atom\_site contents detected.

CELLZ01\_ALERT\_1\_G ALERT: Large difference may be due to a  
symmetry error - see SYMMG tests  
From the CIF: \_cell\_formula\_units\_Z 2  
From the CIF: \_chemical\_formula\_sum C42 H148 Cl8 Cu Gd2 N28 O67  
TEST: Compare cell contents of formula and atom\_site data

| atom | Z*formula | cif sites | diff   |
|------|-----------|-----------|--------|
| C    | 84.00     | 84.00     | 0.00   |
| H    | 296.00    | 84.00     | 212.00 |
| Cl   | 16.00     | 16.00     | 0.00   |
| Cu   | 2.00      | 2.00      | 0.00   |
| Gd   | 4.00      | 4.00      | 0.00   |
| N    | 56.00     | 56.00     | 0.00   |
| O    | 134.00    | 48.00     | 86.00  |

PLAT002\_ALERT\_2\_G Number of Distance or Angle Restraints on AtSite 4

PLAT003\_ALERT\_2\_G Number of Uiso or Uij Restrained Atom Sites .... 8

PLAT004\_ALERT\_5\_G Info: Polymeric Structure Found with Dimension . 1

PLAT005\_ALERT\_5\_G No \_iucr\_refine\_instructions\_details in the CIF ?

PLAT042\_ALERT\_1\_G Calc. and Reported MoietyFormula Strings Differ ?

PLAT044\_ALERT\_1\_G Calculated and Reported Dx Differ ..... ?

PLAT072\_ALERT\_2\_G SHELXL First Parameter in WGHT Unusually Large. 0.20

PLAT194\_ALERT\_1\_G Missing \_cell\_measurement\_reflms\_used datum .... ?

PLAT195\_ALERT\_1\_G Missing \_cell\_measurement\_theta\_max datum .... ?

PLAT196\_ALERT\_1\_G Missing \_cell\_measurement\_theta\_min datum .... ?

PLAT302\_ALERT\_4\_G Note: Anion/Solvent Disorder ..... 22 Perc.

PLAT606\_ALERT\_4\_G VERY LARGE Solvent Accessible VOID(S) in Structure !

PLAT790\_ALERT\_4\_G Centre of Gravity not Within Unit Cell: Resd. # 2  
Cl4 Cu

PLAT790\_ALERT\_4\_G Centre of Gravity not Within Unit Cell: Resd. # 7

|                   |                                                 |               |    |
|-------------------|-------------------------------------------------|---------------|----|
| C1                |                                                 |               |    |
| PLAT790_ALERT_4_G | Centre of Gravity not Within Unit Cell: Resd.   | #             | 8  |
| C1                |                                                 |               |    |
| PLAT790_ALERT_4_G | Centre of Gravity not Within Unit Cell: Resd.   | #             | 9  |
| C1                |                                                 |               |    |
| PLAT793_ALERT_4_G | The Model has Chirality at C8                   | (Verify) .... | R  |
| PLAT793_ALERT_4_G | The Model has Chirality at C9                   | (Verify) .... | S  |
| PLAT793_ALERT_4_G | The Model has Chirality at C14                  | (Verify) .... | S  |
| PLAT793_ALERT_4_G | The Model has Chirality at C15                  | (Verify) .... | S  |
| PLAT793_ALERT_4_G | The Model has Chirality at C20                  | (Verify) .... | S  |
| PLAT793_ALERT_4_G | The Model has Chirality at C21                  | (Verify) .... | R  |
| PLAT793_ALERT_4_G | The Model has Chirality at C33                  | (Verify) .... | S  |
| PLAT793_ALERT_4_G | The Model has Chirality at C38                  | (Verify) .... | R  |
| PLAT860_ALERT_3_G | Note: Number of Least-Squares Restraints .....  |               | 50 |
| PLAT869_ALERT_4_G | ALERTS Related to the use of SQUEEZE Suppressed |               | !  |

---

1 **ALERT level A** = Most likely a serious problem - resolve or explain  
 0 **ALERT level B** = A potentially serious problem, consider carefully  
 20 **ALERT level C** = Check. Ensure it is not caused by an omission or oversight  
 29 **ALERT level G** = General information/check it is not something unexpected

10 ALERT type 1 CIF construction/syntax error, inconsistent or missing data  
 16 ALERT type 2 Indicator that the structure model may be wrong or deficient  
 4 ALERT type 3 Indicator that the structure quality may be low  
 18 ALERT type 4 Improvement, methodology, query or suggestion  
 2 ALERT type 5 Informative message, check

---

## Datablock: 07

---

Bond precision: C-C = 0.0164 A                      Wavelength=0.71073

Cell:                      a=16.979(3)                      b=17.140(3)                      c=20.168(3)  
                               alpha=97.223(7)                      beta=113.441(6)                      gamma=111.556(6)

Temperature:    223 K



|                | Calculated                                  | Reported                                      |
|----------------|---------------------------------------------|-----------------------------------------------|
| Volume         | 4747.2(15)                                  | 4747.3(14)                                    |
| Space group    | P -1                                        | P -1                                          |
| Hall group     | -P 1                                        | -P 1                                          |
| Moiety formula | C42 H42 Dy2 N28 O24, Cl4<br>Co, 4.8(Cl0.20) | C42 H62 Dy2 N28 O24, Co<br>Cl4, 4Cl, 39(H2 O) |
| Sum formula    | C42 H42 Cl8 Co Dy2 N28 O24                  | C42 H140 Cl8 Co Dy2 N28<br>O63                |
| Mr             | 1990.57                                     | 2713.35                                       |
| Dx,g cm-3      | 1.393                                       | 1.898                                         |
| Z              | 2                                           | 2                                             |
| Mu (mm-1)      | 2.025                                       | 2.081                                         |
| F000           | 1954.0                                      | 2774.0                                        |
| F000'          | 1957.03                                     |                                               |
| h,k,lmax       | 20,20,24                                    | 20,20,24                                      |
| Nref           | 16914                                       | 16666                                         |
| Tmin,Tmax      | 0.694,0.747                                 | 0.669,0.759                                   |
| Tmin'          | 0.640                                       |                                               |

Correction method= MULTI-SCAN

Data completeness= 0.985                      Theta(max)= 25.100

R(reflections)= 0.0886( 12014)              wR2(reflections)= 0.2524( 16666)

S = 1.022                                      Npar= 920

The following ALERTS were generated. Each ALERT has the format

**test-name\_ALERT\_alert-type\_alert-level.**

Click on the hyperlinks for more details of the test.

#### Alert level A

CHEMW03\_ALERT\_2\_A ALERT: The ratio of given/expected molecular weight as  
calculated from the \_atom\_site\* data lies outside  
the range 0.90 <> 1.10

From the CIF: \_cell\_formula\_units\_Z                                      2

From the CIF: \_chemical\_formula\_weight                                      2713.35

TEST: Calculate formula weight from \_atom\_site\_\*

| atom | mass   | num   | sum    |
|------|--------|-------|--------|
| C    | 12.01  | 42.00 | 504.46 |
| H    | 1.01   | 42.00 | 42.34  |
| N    | 14.01  | 28.00 | 392.20 |
| O    | 16.00  | 24.00 | 383.98 |
| Cl   | 35.45  | 8.00  | 283.62 |
| Dy   | 162.50 | 2.00  | 325.00 |
| Co   | 58.93  | 1.00  | 58.93  |

Calculated formula weight                                      1990.53

PLAT434\_ALERT\_2\_A Short Inter HL..HL Contact    Cl8    ..    Cl8    .                      2.40 Ang.

#### Alert level C

RFACR01\_ALERT\_3\_C The value of the weighted R factor is > 0.25

Weighted R factor given 0.252

|                   |                                                  |                                  |            |
|-------------------|--------------------------------------------------|----------------------------------|------------|
| PLAT041_ALERT_1_C | Calc. and Reported SumFormula                    | Strings Differ                   | ?          |
| PLAT051_ALERT_1_C | Mu(calc) and Mu(CIF) Ratio Differs from 1.0 by   |                                  | 2.68 Perc. |
| PLAT068_ALERT_1_C | Reported F000 Differs from Calcd (or Missing)... |                                  | ?          |
| PLAT213_ALERT_2_C | Atom O5                                          | has ADP max/min Ratio .....      | 3.1 oblat  |
| PLAT213_ALERT_2_C | Atom O9                                          | has ADP max/min Ratio .....      | 3.1 oblat  |
| PLAT213_ALERT_2_C | Atom C34                                         | has ADP max/min Ratio .....      | 3.1 oblat  |
| PLAT232_ALERT_2_C | Hirshfeld Test Diff (M-X) Dy1 -- O2              |                                  | 5.7 su     |
| PLAT242_ALERT_2_C | Check Low                                        | Ueq as Compared to Neighbors for | Dy1        |
| PLAT242_ALERT_2_C | Check Low                                        | Ueq as Compared to Neighbors for | Dy2        |
| PLAT250_ALERT_2_C | Large U3/U1 Ratio for Average U(i,j) Tensor      | ....                             | 2.2        |
| PLAT342_ALERT_3_C | Low Bond Precision on C-C Bonds .....            |                                  | 0.0164 Ang |
| PLAT431_ALERT_2_C | Short Inter HL..A Contact Cl5 .. O7W             | .                                | 3.14 Ang.  |
| PLAT431_ALERT_2_C | Short Inter HL..A Contact Cl6 .. O10W            | .                                | 3.04 Ang.  |
| PLAT431_ALERT_2_C | Short Inter HL..A Contact Cl6 .. O10W            | .                                | 3.04 Ang.  |
| PLAT431_ALERT_2_C | Short Inter HL..A Contact Cl7 .. O10W            | .                                | 3.16 Ang.  |
| PLAT431_ALERT_2_C | Short Inter HL..A Contact Cl8 .. O5W             | .                                | 2.99 Ang.  |

### Alert level G

FORMU01\_ALERT\_2\_G There is a discrepancy between the atom counts in the  
 \_chemical\_formula\_sum and the formula from the \_atom\_site\* data.  
 Atom count from \_chemical\_formula\_sum: C42 H140 Cl8 Co1 Dy2 N28 O63  
 Atom count from the \_atom\_site data: C42 H42 Cl8 Co1 Dy2 N28 O24  
 CELLZ01\_ALERT\_1\_G Difference between formula and atom\_site contents detected.  
 CELLZ01\_ALERT\_1\_G ALERT: Large difference may be due to a  
 symmetry error - see SYMMG tests  
 From the CIF: \_cell\_formula\_units\_Z 2  
 From the CIF: \_chemical\_formula\_sum C42 H140 Cl8 Co Dy2 N28 O63  
 TEST: Compare cell contents of formula and atom\_site data

| atom | Z*formula | cif sites | diff   |
|------|-----------|-----------|--------|
| C    | 84.00     | 84.00     | 0.00   |
| H    | 280.00    | 84.00     | 196.00 |
| Cl   | 16.00     | 16.00     | 0.00   |
| Co   | 2.00      | 2.00      | 0.00   |
| Dy   | 4.00      | 4.00      | 0.00   |
| N    | 56.00     | 56.00     | 0.00   |
| O    | 126.00    | 48.00     | 78.00  |

|                   |                                                    |         |
|-------------------|----------------------------------------------------|---------|
| PLAT002_ALERT_2_G | Number of Distance or Angle Restraints on AtSite   | 5       |
| PLAT003_ALERT_2_G | Number of Uiso or Uij Restrained Atom Sites ....   | 6       |
| PLAT004_ALERT_5_G | Info: Polymeric Structure Found with Dimension .   | 1       |
| PLAT005_ALERT_5_G | No _iucr_refine_instructions_details in the CIF    | ?       |
| PLAT042_ALERT_1_G | Calc. and Reported MoietyFormula Strings Differ    | ?       |
| PLAT044_ALERT_1_G | Calculated and Reported Dx Differ .....            | ?       |
| PLAT072_ALERT_2_G | SHELXL First Parameter in WGHT Unusually Large.    | 0.17    |
| PLAT194_ALERT_1_G | Missing _cell_measurement_reflns_used datum ....   | ?       |
| PLAT195_ALERT_1_G | Missing _cell_measurement_theta_max datum ....     | ?       |
| PLAT196_ALERT_1_G | Missing _cell_measurement_theta_min datum ....     | ?       |
| PLAT302_ALERT_4_G | Note: Anion/Solvent Disorder .....                 | 5 Perc. |
| PLAT606_ALERT_4_G | VERY LARGE Solvent Accessible VOID(S) in Structure | !       |
| PLAT790_ALERT_4_G | Centre of Gravity not Within Unit Cell: Resd. #    | 3       |
|                   | Cl                                                 |         |
| PLAT790_ALERT_4_G | Centre of Gravity not Within Unit Cell: Resd. #    | 5       |
|                   | Cl                                                 |         |
| PLAT790_ALERT_4_G | Centre of Gravity not Within Unit Cell: Resd. #    | 7       |
|                   | Cl                                                 |         |
| PLAT790_ALERT_4_G | Centre of Gravity not Within Unit Cell: Resd. #    | 8       |
|                   | Cl0.20                                             |         |
| PLAT793_ALERT_4_G | The Model has Chirality at C2 (Verify) ....        | S       |
| PLAT793_ALERT_4_G | The Model has Chirality at C3 (Verify) ....        | R       |

```

PLAT793_ALERT_4_G The Model has Chirality at C15      (Verify) ....      S
PLAT793_ALERT_4_G The Model has Chirality at C20      (Verify) ....      S
PLAT793_ALERT_4_G The Model has Chirality at C32      (Verify) ....      R
PLAT793_ALERT_4_G The Model has Chirality at C33      (Verify) ....      S
PLAT793_ALERT_4_G The Model has Chirality at C38      (Verify) ....      S
PLAT793_ALERT_4_G The Model has Chirality at C39      (Verify) ....      S
PLAT860_ALERT_3_G Note: Number of Least-Squares Restraints ..... 39
PLAT869_ALERT_4_G ALERTS Related to the use of SQUEEZE Suppressed      !

```

---

```

 2 ALERT level A = Most likely a serious problem - resolve or explain
 0 ALERT level B = A potentially serious problem, consider carefully
17 ALERT level C = Check. Ensure it is not caused by an omission or oversight
29 ALERT level G = General information/check it is not something unexpected

```

```

10 ALERT type 1 CIF construction/syntax error, inconsistent or missing data
18 ALERT type 2 Indicator that the structure model may be wrong or deficient
 3 ALERT type 3 Indicator that the structure quality may be low
15 ALERT type 4 Improvement, methodology, query or suggestion
 2 ALERT type 5 Informative message, check

```

---

## Datablock: 08

---

Bond precision: C-C = 0.0257 A

Wavelength=0.71073

Cell: a=17.085(4) b=17.228(4) c=20.219(6)  
alpha=97.325(10) beta=113.561(7) gamma=111.615(7)  
Temperature: 223 K

|                | Calculated                                                            | Reported                                      |
|----------------|-----------------------------------------------------------------------|-----------------------------------------------|
| Volume         | 4801(2)                                                               | 4801(2)                                       |
| Space group    | P -1                                                                  | P -1                                          |
| Hall group     | -P 1                                                                  | -P 1                                          |
| Moiety formula | C42 H42 Er2 N28 O24, Cl4<br>Co, 2.5(Cl0.50), Cl0.50,<br>Cl0.50, 1.5(C | C42 H62 Er2 N28 O24, Co<br>Cl4, 4Cl, 47(H2 O) |
| Sum formula    | C42 H42 Cl8 Co Er2 N28 O24                                            | C42 H156 Cl8 Co Er2 N28<br>O71                |
| Mr             | 2000.09                                                               | 2867.00                                       |
| Dx,g cm-3      | 1.384                                                                 | 1.983                                         |
| Z              | 2                                                                     | 2                                             |
| Mu (mm-1)      | 2.194                                                                 | 2.261                                         |
| F000           | 1962.0                                                                | 2942.0                                        |
| F000'          | 1964.77                                                               |                                               |
| h,k,lmax       | 20,20,24                                                              | 20,20,24                                      |
| Nref           | 16913                                                                 | 16592                                         |
| Tmin,Tmax      | 0.672,0.745                                                           | 0.673,0.758                                   |
| Tmin'          | 0.644                                                                 |                                               |

Correction method= MULTI-SCAN

Data completeness= 0.981

Theta(max)= 25.000

R(reflections)= 0.1200( 10343)

wR2(reflections)= 0.3393( 16592)

S = 1.114

Npar= 857

---

The following ALERTS were generated. Each ALERT has the format

**test-name\_ALERT\_alert-type\_alert-level.**

Click on the hyperlinks for more details of the test.

---

### Alert level A

CHEMW03\_ALERT\_2\_A ALERT: The ratio of given/expected molecular weight as  
calculated from the \_atom\_site\* data lies outside  
the range 0.90 <> 1.10

From the CIF: \_cell\_formula\_units\_Z 2

From the CIF: \_chemical\_formula\_weight 2867.00

TEST: Calculate formula weight from \_atom\_site\_\*

| atom | mass   | num   | sum    |
|------|--------|-------|--------|
| C    | 12.01  | 42.00 | 504.46 |
| H    | 1.01   | 42.00 | 42.34  |
| N    | 14.01  | 28.00 | 392.20 |
| O    | 16.00  | 24.00 | 383.98 |
| Cl   | 35.45  | 8.00  | 283.62 |
| Er   | 167.26 | 2.00  | 334.52 |
| Co   | 58.93  | 1.00  | 58.93  |

Calculated formula weight 2000.05

PLAT410\_ALERT\_2\_A Short Intra H...H Contact H27 .. H30B .. 1.76 Ang.

---

### Alert level B

PLAT230\_ALERT\_2\_B Hirshfeld Test Diff for N23 -- C30 .. 7.2 su

PLAT230\_ALERT\_2\_B Hirshfeld Test Diff for N25 -- C35 .. 7.4 su

PLAT342\_ALERT\_3\_B Low Bond Precision on C-C Bonds ..... 0.0257 Ang

---

### Alert level C

RFACG01\_ALERT\_3\_C The value of the R factor is > 0.10

R factor given 0.120

RFACR01\_ALERT\_3\_C The value of the weighted R factor is > 0.25

Weighted R factor given 0.339

PLAT041\_ALERT\_1\_C Calc. and Reported SumFormula Strings Differ ?

PLAT051\_ALERT\_1\_C Mu(calc) and Mu(CIF) Ratio Differs from 1.0 by . 2.95 Perc.

PLAT068\_ALERT\_1\_C Reported F000 Differs from Calcd (or Missing)... ?

PLAT082\_ALERT\_2\_C High R1 Value ..... 0.12

PLAT084\_ALERT\_2\_C High wR2 Value ..... 0.34

PLAT213\_ALERT\_2\_C Atom O9 has ADP max/min Ratio ..... 3.3 oblat

PLAT213\_ALERT\_2\_C Atom O14 has ADP max/min Ratio ..... 3.1 prola

PLAT213\_ALERT\_2\_C Atom C25 has ADP max/min Ratio ..... 3.2 prola

PLAT230\_ALERT\_2\_C Hirshfeld Test Diff for N1 -- C1 .. 5.4 su

PLAT230\_ALERT\_2\_C Hirshfeld Test Diff for N1 -- C2 .. 6.6 su

PLAT230\_ALERT\_2\_C Hirshfeld Test Diff for N5 -- C5 .. 6.0 su

PLAT230\_ALERT\_2\_C Hirshfeld Test Diff for N5 -- C7 .. 7.0 su

PLAT230\_ALERT\_2\_C Hirshfeld Test Diff for N18 -- C27 .. 6.6 su

PLAT230\_ALERT\_2\_C Hirshfeld Test Diff for N20 -- C27 .. 6.7 su

PLAT230\_ALERT\_2\_C Hirshfeld Test Diff for N20 -- C28 .. 6.0 su

PLAT230\_ALERT\_2\_C Hirshfeld Test Diff for N20 -- C30 .. 5.1 su

PLAT232\_ALERT\_2\_C Hirshfeld Test Diff (M-X) Er2 -- O6W .. 5.5 su

PLAT232\_ALERT\_2\_C Hirshfeld Test Diff (M-X) Er2 -- O8W .. 9.0 su

|                   |                                |                                  |     |      |      |           |
|-------------------|--------------------------------|----------------------------------|-----|------|------|-----------|
| PLAT234_ALERT_4_C | Large Hirshfeld Difference N13 | --                               | C20 | ..   | 0.17 | Ang.      |
| PLAT234_ALERT_4_C | Large Hirshfeld Difference N14 | --                               | C23 | ..   | 0.16 | Ang.      |
| PLAT234_ALERT_4_C | Large Hirshfeld Difference N26 | --                               | C37 | ..   | 0.18 | Ang.      |
| PLAT242_ALERT_2_C | Check Low                      | Ueq as Compared to Neighbors for |     |      | Er2  |           |
| PLAT242_ALERT_2_C | Check Low                      | Ueq as Compared to Neighbors for |     |      | C16  |           |
| PLAT242_ALERT_2_C | Check Low                      | Ueq as Compared to Neighbors for |     |      | C22  |           |
| PLAT410_ALERT_2_C | Short Intra H...H Contact      | H29A                             | ..  | H30B | ..   | 1.93 Ang. |
| PLAT431_ALERT_2_C | Short Inter HL..A Contact      | C13                              | ..  | O4W  | .    | 3.16 Ang. |
| PLAT431_ALERT_2_C | Short Inter HL..A Contact      | C15                              | ..  | O4W  | .    | 3.16 Ang. |
| PLAT431_ALERT_2_C | Short Inter HL..A Contact      | C16                              | ..  | O5W  | .    | 3.05 Ang. |
| PLAT431_ALERT_2_C | Short Inter HL..A Contact      | C16                              | ..  | O5W  | .    | 3.05 Ang. |

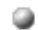

### Alert level G

FORMU01\_ALERT\_2\_G There is a discrepancy between the atom counts in the  
     \_chemical\_formula\_sum and the formula from the \_atom\_site\* data.  
     Atom count from \_chemical\_formula\_sum: C42 H156 Cl8 Co1 Er2 N28 O71  
     Atom count from the \_atom\_site data: C42 H42 Cl8 Co1 Er2 N28 O24

CELLZ01\_ALERT\_1\_G Difference between formula and atom\_site contents detected.  
 CELLZ01\_ALERT\_1\_G ALERT: Large difference may be due to a  
     symmetry error - see SYMMG tests  
     From the CIF: \_cell\_formula\_units\_Z 2  
     From the CIF: \_chemical\_formula\_sum C42 H156 Cl8 Co Er2 N28 O71  
     TEST: Compare cell contents of formula and atom\_site data

| atom | Z*formula | cif sites | diff   |
|------|-----------|-----------|--------|
| C    | 84.00     | 84.00     | 0.00   |
| H    | 312.00    | 84.00     | 228.00 |
| Cl   | 16.00     | 16.00     | 0.00   |
| Co   | 2.00      | 2.00      | 0.00   |
| Er   | 4.00      | 4.00      | 0.00   |
| N    | 56.00     | 56.00     | 0.00   |
| O    | 142.00    | 48.00     | 94.00  |

PLAT002\_ALERT\_2\_G Number of Distance or Angle Restraints on AtSite 8  
 PLAT003\_ALERT\_2\_G Number of Uiso or Uij Restrained Atom Sites .... 10  
 PLAT004\_ALERT\_5\_G Info: Polymeric Structure Found with Dimension . 1  
 PLAT005\_ALERT\_5\_G No \_iucr\_refine\_instructions\_details in the CIF ?  
 PLAT042\_ALERT\_1\_G Calc. and Reported MoietyFormula Strings Differ ?  
 PLAT044\_ALERT\_1\_G Calculated and Reported Dx Differ ..... ?  
 PLAT072\_ALERT\_2\_G SHELXL First Parameter in WGHT Unusually Large. 0.20  
 PLAT194\_ALERT\_1\_G Missing \_cell\_measurement\_reflms\_used datum .... ?  
 PLAT195\_ALERT\_1\_G Missing \_cell\_measurement\_theta\_max datum .... ?  
 PLAT196\_ALERT\_1\_G Missing \_cell\_measurement\_theta\_min datum .... ?  
 PLAT302\_ALERT\_4\_G Note: Anion/Solvent Disorder ..... 26 Perc.  
 PLAT606\_ALERT\_4\_G VERY LARGE Solvent Accessible VOID(S) in Structure !  
 PLAT790\_ALERT\_4\_G Centre of Gravity not Within Unit Cell: Resd. # 3  
     C1  
 PLAT790\_ALERT\_4\_G Centre of Gravity not Within Unit Cell: Resd. # 8  
     C1  
 PLAT793\_ALERT\_4\_G The Model has Chirality at C2 (Verify) .... S  
 PLAT793\_ALERT\_4\_G The Model has Chirality at C3 (Verify) .... R  
 PLAT793\_ALERT\_4\_G The Model has Chirality at C15 (Verify) .... S  
 PLAT793\_ALERT\_4\_G The Model has Chirality at C20 (Verify) .... R  
 PLAT793\_ALERT\_4\_G The Model has Chirality at C32 (Verify) .... R  
 PLAT793\_ALERT\_4\_G The Model has Chirality at C33 (Verify) .... S  
 PLAT793\_ALERT\_4\_G The Model has Chirality at C38 (Verify) .... S  
 PLAT793\_ALERT\_4\_G The Model has Chirality at C39 (Verify) .... S  
 PLAT860\_ALERT\_3\_G Note: Number of Least-Squares Restraints ..... 65  
 PLAT869\_ALERT\_4\_G ALERTS Related to the use of SQUEEZE Suppressed !

---

2 **ALERT level A** = Most likely a serious problem - resolve or explain

3 **ALERT level B** = A potentially serious problem, consider carefully  
 31 **ALERT level C** = Check. Ensure it is not caused by an omission or oversight  
 27 **ALERT level G** = General information/check it is not something unexpected

10 ALERT type 1 CIF construction/syntax error, inconsistent or missing data  
 31 ALERT type 2 Indicator that the structure model may be wrong or deficient  
 4 ALERT type 3 Indicator that the structure quality may be low  
 16 ALERT type 4 Improvement, methodology, query or suggestion  
 2 ALERT type 5 Informative message, check

---

## Datablock: 09

---

Bond precision: C-C = 0.0054 A Wavelength=0.71073

Cell: a=17.0739(11) b=27.7218(18) c=20.6280(14)  
 alpha=90 beta=97.558(2) gamma=90

Temperature: 223 K

|                        | Calculated                                         | Reported                                      |
|------------------------|----------------------------------------------------|-----------------------------------------------|
| Volume                 | 9678.8(11)                                         | 9678.8(11)                                    |
| Space group            | P 21/c                                             | P 21/c                                        |
| Hall group             | -P 2ybc                                            | -P 2ybc                                       |
| Moiety formula         | C42 H42 Eu2 N28 O24, Cl4<br>Co, 4(Cl0.50), 0.5(Cl) | C42 H62 Eu2 N28 O24, Co<br>Cl4, 4Cl, 34(H2 O) |
| Sum formula            | C42 H42 Cl8 Co Eu2 N28 O24                         | C42 H130 Cl8 Co Eu2 N28<br>O58                |
| Mr                     | 1969.51                                            | 2602.19                                       |
| Dx, g cm <sup>-3</sup> | 1.352                                              | 1.786                                         |
| Z                      | 4                                                  | 4                                             |
| Mu (mm <sup>-1</sup> ) | 1.739                                              | 1.787                                         |
| F000                   | 3884.0                                             | 5324.0                                        |
| F000'                  | 3890.30                                            |                                               |
| h,k,lmax               | 20,33,24                                           | 20,33,24                                      |
| Nref                   | 17253                                              | 17146                                         |
| Tmin,Tmax              | 0.580,0.617                                        | 0.607,0.644                                   |
| Tmin'                  | 0.569                                              |                                               |

Correction method= MULTI-SCAN

Data completeness= 0.994 Theta(max)= 25.100

R(reflections)= 0.0433( 12777) wR2(reflections)= 0.1243( 17146)

S = 1.016 Npar= 949

---

The following ALERTS were generated. Each ALERT has the format

**test-name\_ALERT\_alert-type\_alert-level.**

Click on the hyperlinks for more details of the test.

---

### Alert level A

CHEMW03\_ALERT\_2\_A ALERT: The ratio of given/expected molecular weight as calculated from the \_atom\_site\* data lies outside the range 0.90 <> 1.10

From the CIF: \_cell\_formula\_units\_Z 4

From the CIF: \_chemical\_formula\_weight 2602.19

TEST: Calculate formula weight from \_atom\_site\_\*

| atom | mass   | num   | sum    |
|------|--------|-------|--------|
| C    | 12.01  | 42.00 | 504.46 |
| H    | 1.01   | 42.00 | 42.34  |
| N    | 14.01  | 28.00 | 392.20 |
| O    | 16.00  | 24.00 | 383.98 |
| Cl   | 35.45  | 8.00  | 283.62 |
| Eu   | 151.96 | 2.00  | 303.92 |
| Co   | 58.93  | 1.00  | 58.93  |

Calculated formula weight 1969.45

---

### Alert level B

PLAT213\_ALERT\_2\_B Atom C5 has ADP max/min Ratio ..... 4.2 prola

PLAT230\_ALERT\_2\_B Hirshfeld Test Diff for N5 -- C7 .. 10.0 su

---

### Alert level C

PLAT041\_ALERT\_1\_C Calc. and Reported SumFormula Strings Differ ?

PLAT051\_ALERT\_1\_C Mu(calc) and Mu(CIF) Ratio Differs from 1.0 by . 2.70 Perc.

PLAT068\_ALERT\_1\_C Reported F000 Differs from Calcd (or Missing)... ?

PLAT094\_ALERT\_2\_C Ratio of Maximum / Minimum Residual Density .... 3.61

PLAT213\_ALERT\_2\_C Atom N5 has ADP max/min Ratio ..... 3.6 prola

PLAT230\_ALERT\_2\_C Hirshfeld Test Diff for N5 -- C5 .. 7.0 su

PLAT242\_ALERT\_2\_C Check Low Ueq as Compared to Neighbors for Eu1

PLAT242\_ALERT\_2\_C Check Low Ueq as Compared to Neighbors for Eu2

PLAT250\_ALERT\_2\_C Large U3/U1 Ratio for Average U(i,j) Tensor .... 2.3

PLAT431\_ALERT\_2\_C Short Inter HL..A Contact Cl4 .. O6W . 3.16 Ang.

PLAT431\_ALERT\_2\_C Short Inter HL..A Contact Cl5 .. O6W . 3.12 Ang.

PLAT431\_ALERT\_2\_C Short Inter HL..A Contact Cl6 .. O9W . 3.03 Ang.

PLAT431\_ALERT\_2\_C Short Inter HL..A Contact Cl6 .. O5W . 3.14 Ang.

---

### Alert level G

FORMU01\_ALERT\_2\_G There is a discrepancy between the atom counts in the

\_chemical\_formula\_sum and the formula from the \_atom\_site\* data.

Atom count from \_chemical\_formula\_sum: C42 H130 Cl8 Co1 Eu2 N28 O58

Atom count from the \_atom\_site data: C42 H42 Cl8 Co1 Eu2 N28 O24

CELLZ01\_ALERT\_1\_G Difference between formula and atom\_site contents detected.

CELLZ01\_ALERT\_1\_G ALERT: Large difference may be due to a

symmetry error - see SYMMG tests

From the CIF: \_cell\_formula\_units\_Z 4

From the CIF: \_chemical\_formula\_sum C42 H130 Cl8 Co Eu2 N28 O58

TEST: Compare cell contents of formula and atom\_site data

| atom | Z*formula | cif sites | diff   |
|------|-----------|-----------|--------|
| C    | 168.00    | 168.00    | 0.00   |
| H    | 520.00    | 168.00    | 352.00 |
| Cl   | 32.00     | 32.00     | 0.00   |
| Co   | 4.00      | 4.00      | 0.00   |

|    |        |        |        |  |
|----|--------|--------|--------|--|
| Eu | 8.00   | 8.00   | 0.00   |  |
| N  | 112.00 | 112.00 | 0.00   |  |
| O  | 232.00 | 96.00  | 136.00 |  |

PLAT004\_ALERT\_5\_G Info: Polymeric Structure Found with Dimension . 1  
 PLAT005\_ALERT\_5\_G No \_iucr\_refine\_instructions\_details in the CIF ?  
 PLAT042\_ALERT\_1\_G Calc. and Reported MoietyFormula Strings Differ ?  
 PLAT044\_ALERT\_1\_G Calculated and Reported Dx Differ ..... ?  
 PLAT194\_ALERT\_1\_G Missing \_cell\_measurement\_reflms\_used datum .... ?  
 PLAT195\_ALERT\_1\_G Missing \_cell\_measurement\_theta\_max datum .... ?  
 PLAT196\_ALERT\_1\_G Missing \_cell\_measurement\_theta\_min datum .... ?  
 PLAT302\_ALERT\_4\_G Note: Anion/Solvent Disorder ..... 11 Perc.  
 PLAT434\_ALERT\_2\_G Short Inter HL..HL Contact Cl6 .. Cl8 . 2.89 Ang.  
 PLAT434\_ALERT\_2\_G Short Inter HL..HL Contact Cl7 .. Cl9 . 2.96 Ang.  
 PLAT606\_ALERT\_4\_G VERY LARGE Solvent Accessible VOID(S) in Structure !  
 PLAT790\_ALERT\_4\_G Centre of Gravity not Within Unit Cell: Resd. # 2  
                   Cl4 Co  
 PLAT790\_ALERT\_4\_G Centre of Gravity not Within Unit Cell: Resd. # 5  
                   Cl  
 PLAT790\_ALERT\_4\_G Centre of Gravity not Within Unit Cell: Resd. # 6  
                   Cl  
 PLAT793\_ALERT\_4\_G The Model has Chirality at C2 (Verify) .... S  
 PLAT793\_ALERT\_4\_G The Model has Chirality at C3 (Verify) .... R  
 PLAT793\_ALERT\_4\_G The Model has Chirality at C32 (Verify) .... R  
 PLAT793\_ALERT\_4\_G The Model has Chirality at C33 (Verify) .... S  
 PLAT793\_ALERT\_4\_G The Model has Chirality at C38 (Verify) .... R  
 PLAT793\_ALERT\_4\_G The Model has Chirality at C39 (Verify) .... S  
 PLAT869\_ALERT\_4\_G ALERTS Related to the use of SQUEEZE Suppressed !

---

1 **ALERT level A** = Most likely a serious problem - resolve or explain  
 2 **ALERT level B** = A potentially serious problem, consider carefully  
 13 **ALERT level C** = Check. Ensure it is not caused by an omission or oversight  
 24 **ALERT level G** = General information/check it is not something unexpected

10 ALERT type 1 CIF construction/syntax error, inconsistent or missing data  
 16 ALERT type 2 Indicator that the structure model may be wrong or deficient  
 0 ALERT type 3 Indicator that the structure quality may be low  
 12 ALERT type 4 Improvement, methodology, query or suggestion  
 2 ALERT type 5 Informative message, check

---

## Datablock: 10

---

Bond precision: C-C = 0.0050 A

Wavelength=0.71073

Cell: a=17.0997(11) b=27.7353(19) c=20.6163(13)

alpha=90 beta=97.468(2) gamma=90

Temperature: 223 K



|                | Calculated                                         | Reported                                      |
|----------------|----------------------------------------------------|-----------------------------------------------|
| Volume         | 9694.7(11)                                         | 9694.7(11)                                    |
| Space group    | P 21/c                                             | P 21/c                                        |
| Hall group     | -P 2ybc                                            | -P 2ybc                                       |
| Moiety formula | C42 H42 Gd2 N28 O24, Cl4<br>Co, 4(Cl0.50), 0.5(Cl) | C42 H62 Gd2 N28 O24, Co<br>Cl4, 4Cl, 34(H2 O) |
| Sum formula    | C42 H42 Cl8 Co Gd2 N28 O24                         | C42 H130 Cl8 Co Gd2 N28<br>O58                |
| Mr             | 1980.07                                            | 2612.77                                       |
| Dx,g cm-3      | 1.357                                              | 1.790                                         |
| Z              | 4                                                  | 4                                             |
| Mu (mm-1)      | 1.810                                              | 1.858                                         |
| F000           | 3892.0                                             | 5332.0                                        |
| F000'          | 3898.21                                            |                                               |
| h,k,lmax       | 20,33,24                                           | 20,33,24                                      |
| Nref           | 17282                                              | 17169                                         |
| Tmin,Tmax      | 0.589,0.640                                        | 0.615,0.664                                   |
| Tmin'          | 0.578                                              |                                               |

Correction method= MULTI-SCAN

Data completeness= 0.993

Theta(max)= 25.100

R(reflections)= 0.0404( 12787)

wR2(reflections)= 0.1217( 17169)

S = 0.951

Npar= 955

The following ALERTS were generated. Each ALERT has the format

**test-name\_ALERT\_alert-type\_alert-level.**

Click on the hyperlinks for more details of the test.

### Alert level A

CHEMW03\_ALERT\_2\_A ALERT: The ratio of given/expected molecular weight as  
calculated from the \_atom\_site\* data lies outside  
the range 0.90 <> 1.10

From the CIF: \_cell\_formula\_units\_Z 4

From the CIF: \_chemical\_formula\_weight 2612.77

TEST: Calculate formula weight from \_atom\_site\_\*

| atom | mass   | num   | sum    |
|------|--------|-------|--------|
| C    | 12.01  | 42.00 | 504.46 |
| H    | 1.01   | 42.00 | 42.34  |
| N    | 14.01  | 28.00 | 392.20 |
| O    | 16.00  | 24.00 | 383.98 |
| Cl   | 35.45  | 8.00  | 283.62 |
| Gd   | 157.25 | 2.00  | 314.50 |
| Co   | 58.93  | 1.00  | 58.93  |

Calculated formula weight 1980.03

PLAT213\_ALERT\_2\_A Atom N22

has ADP max/min Ratio .....

5.3 prola

### Alert level B

PLAT213\_ALERT\_2\_B Atom C6

has ADP max/min Ratio .....

4.4 prola

---

## ● Alert level C

|                   |                                                 |                                    |            |
|-------------------|-------------------------------------------------|------------------------------------|------------|
| PLAT041_ALERT_1_C | Calc. and Reported SumFormula                   | Strings Differ                     | ?          |
| PLAT051_ALERT_1_C | Mu(calc) and Mu(CIF) Ratio                      | Differs from 1.0 by .              | 2.58 Perc. |
| PLAT068_ALERT_1_C | Reported F000                                   | Differs from Calcd (or Missing)... | ?          |
| PLAT094_ALERT_2_C | Ratio of Maximum / Minimum Residual Density     | ....                               | 2.72       |
| PLAT213_ALERT_2_C | Atom C21                                        | has ADP max/min Ratio .....        | 3.5 oblat  |
| PLAT230_ALERT_2_C | Hirshfeld Test Diff for                         | N22 -- C22 ..                      | 5.7 su     |
| PLAT230_ALERT_2_C | Hirshfeld Test Diff for                         | N22 -- C41 ..                      | 7.0 su     |
| PLAT242_ALERT_2_C | Check Low                                       | Ueq as Compared to Neighbors for   | Gd1        |
| PLAT242_ALERT_2_C | Check Low                                       | Ueq as Compared to Neighbors for   | Gd2        |
| PLAT431_ALERT_2_C | Short Inter HL..A                               | Contact C14 .. O6W .               | 3.16 Ang.  |
| PLAT431_ALERT_2_C | Short Inter HL..A                               | Contact C15 .. O6W .               | 3.14 Ang.  |
| PLAT431_ALERT_2_C | Short Inter HL..A                               | Contact C16 .. O10W .              | 3.04 Ang.  |
| PLAT431_ALERT_2_C | Short Inter HL..A                               | Contact C16 .. O5W .               | 3.14 Ang.  |
| PLAT431_ALERT_2_C | Short Inter HL..A                               | Contact C17 .. O5W .               | 3.15 Ang.  |
| PLAT790_ALERT_4_C | Centre of Gravity not Within Unit Cell: Resd. # |                                    | 1          |
|                   | C42 H42 Gd2 N28 O24                             |                                    |            |

---

## ● Alert level G

FORMU01\_ALERT\_2\_G There is a discrepancy between the atom counts in the  
\_chemical\_formula\_sum and the formula from the \_atom\_site\* data.  
Atom count from \_chemical\_formula\_sum: C42 H130 Cl8 Co1 Gd2 N28 O58  
Atom count from the \_atom\_site data: C42 H42 Cl8 Co1 Gd2 N28 O24

CELLZ01\_ALERT\_1\_G Difference between formula and atom\_site contents detected.  
CELLZ01\_ALERT\_1\_G ALERT: Large difference may be due to a  
symmetry error - see SYMMG tests  
From the CIF: \_cell\_formula\_units\_Z 4  
From the CIF: \_chemical\_formula\_sum C42 H130 Cl8 Co Gd2 N28 O58  
TEST: Compare cell contents of formula and atom\_site data

| atom | Z*formula | cif sites | diff   |
|------|-----------|-----------|--------|
| C    | 168.00    | 168.00    | 0.00   |
| H    | 520.00    | 168.00    | 352.00 |
| Cl   | 32.00     | 32.00     | 0.00   |
| Co   | 4.00      | 4.00      | 0.00   |
| Gd   | 8.00      | 8.00      | 0.00   |
| N    | 112.00    | 112.00    | 0.00   |
| O    | 232.00    | 96.00     | 136.00 |

|                   |                                                    |           |
|-------------------|----------------------------------------------------|-----------|
| PLAT004_ALERT_5_G | Info: Polymeric Structure Found with Dimension .   | 1         |
| PLAT005_ALERT_5_G | No _iucr_refine_instructions_details in the CIF    | ?         |
| PLAT042_ALERT_1_G | Calc. and Reported MoietyFormula Strings Differ    | ?         |
| PLAT044_ALERT_1_G | Calculated and Reported Dx Differ .....            | ?         |
| PLAT194_ALERT_1_G | Missing _cell_measurement_reflms_used datum ....   | ?         |
| PLAT195_ALERT_1_G | Missing _cell_measurement_theta_max datum ....     | ?         |
| PLAT196_ALERT_1_G | Missing _cell_measurement_theta_min datum ....     | ?         |
| PLAT302_ALERT_4_G | Note: Anion/Solvent Disorder .....                 | 11 Perc.  |
| PLAT434_ALERT_2_G | Short Inter HL..HL Contact C12 .. C19 .            | 3.31 Ang. |
| PLAT434_ALERT_2_G | Short Inter HL..HL Contact C16 .. C18 .            | 2.89 Ang. |
| PLAT606_ALERT_4_G | VERY LARGE Solvent Accessible VOID(S) in Structure | !         |
| PLAT790_ALERT_4_G | Centre of Gravity not Within Unit Cell: Resd. #    | 5         |
|                   | C1                                                 |           |
| PLAT790_ALERT_4_G | Centre of Gravity not Within Unit Cell: Resd. #    | 6         |
|                   | C1                                                 |           |
| PLAT790_ALERT_4_G | Centre of Gravity not Within Unit Cell: Resd. #    | 7         |
|                   | C10.50                                             |           |
| PLAT793_ALERT_4_G | The Model has Chirality at C23 (Verify) ....       | S         |
| PLAT793_ALERT_4_G | The Model has Chirality at C24 (Verify) ....       | R         |
| PLAT793_ALERT_4_G | The Model has Chirality at C25 (Verify) ....       | R         |
| PLAT793_ALERT_4_G | The Model has Chirality at C26 (Verify) ....       | S         |
| PLAT793_ALERT_4_G | The Model has Chirality at C27 (Verify) ....       | R         |

PLAT793\_ALERT\_4\_G The Model has Chirality at C28 (Verify) .... S  
PLAT869\_ALERT\_4\_G ALERTS Related to the use of SQUEEZE Suppressed !

---

2 **ALERT level A** = Most likely a serious problem - resolve or explain  
1 **ALERT level B** = A potentially serious problem, consider carefully  
15 **ALERT level C** = Check. Ensure it is not caused by an omission or oversight  
24 **ALERT level G** = General information/check it is not something unexpected

10 ALERT type 1 CIF construction/syntax error, inconsistent or missing data  
17 ALERT type 2 Indicator that the structure model may be wrong or deficient  
0 ALERT type 3 Indicator that the structure quality may be low  
13 ALERT type 4 Improvement, methodology, query or suggestion  
2 ALERT type 5 Informative message, check

---

## Datablock: 11

---

Bond precision: C-C = 0.0140 A Wavelength=0.71073

Cell: a=17.084(2) b=27.493(4) c=20.428(3)  
alpha=90 beta=99.261(4) gamma=90

Temperature: 223 K

|                | Calculated                                         | Reported                                      |
|----------------|----------------------------------------------------|-----------------------------------------------|
| Volume         | 9470(2)                                            | 9470(2)                                       |
| Space group    | P 21/c                                             | P 21/c                                        |
| Hall group     | -P 2ybc                                            | -P 2ybc                                       |
| Moiety formula | C42 H42 Dy2 N28 O24, Cl4<br>Cu, 4(Cl0.50), 0.5(Cl) | C42 H62 Dy2 N28 O24, Cu<br>Cl4, 4Cl, 46(H2 O) |
| Sum formula    | C42 H42 Cl8 Cu Dy2 N28 O24                         | C42 H154 Cl8 Cu Dy2 N28<br>O70                |
| Mr             | 1995.19                                            | 2844.07                                       |
| Dx,g cm-3      | 1.399                                              | 1.995                                         |
| Z              | 4                                                  | 4                                             |
| Mu (mm-1)      | 2.080                                              | 2.146                                         |
| F000           | 3916.0                                             | 5836.0                                        |
| F000'          | 3921.95                                            |                                               |
| h,k,lmax       | 21,33,25                                           | 20,33,25                                      |
| Nref           | 18611                                              | 18333                                         |
| Tmin,Tmax      | 0.723,0.790                                        | 0.712,0.798                                   |
| Tmin'          | 0.687                                              |                                               |

Correction method= MULTI-SCAN

Data completeness= 0.985 Theta(max)= 26.000

R(reflections)= 0.1016( 10670) wR2(reflections)= 0.2797( 18333)

S = 1.023

Npar= 955

The following ALERTS were generated. Each ALERT has the format  
**test-name\_ALERT\_alert-type\_alert-level.**  
 Click on the hyperlinks for more details of the test.

### Alert level A

CHEMW03\_ALERT\_2\_A ALERT: The ratio of given/expected molecular weight as  
 calculated from the \_atom\_site\* data lies outside  
 the range 0.90 <> 1.10  
 From the CIF: \_cell\_formula\_units\_Z 4  
 From the CIF: \_chemical\_formula\_weight 2844.07  
 TEST: Calculate formula weight from \_atom\_site\_\*

| atom | mass   | num   | sum    |
|------|--------|-------|--------|
| C    | 12.01  | 42.00 | 504.46 |
| H    | 1.01   | 42.00 | 42.34  |
| N    | 14.01  | 28.00 | 392.20 |
| O    | 16.00  | 24.00 | 383.98 |
| Cl   | 35.45  | 8.00  | 283.62 |
| Dy   | 162.50 | 2.00  | 325.00 |
| Cu   | 63.55  | 1.00  | 63.55  |

Calculated formula weight 1995.14

|                            |                             |           |
|----------------------------|-----------------------------|-----------|
| PLAT213_ALERT_2_A Atom Dy1 | has ADP max/min Ratio ..... | 7.7 oblat |
| PLAT213_ALERT_2_A Atom Dy2 | has ADP max/min Ratio ..... | 8.0 oblat |

### Alert level B

|                                                 |        |    |         |
|-------------------------------------------------|--------|----|---------|
| PLAT232_ALERT_2_B Hirshfeld Test Diff (M-X) Dy1 | -- O1  | .. | 12.1 su |
| PLAT232_ALERT_2_B Hirshfeld Test Diff (M-X) Dy1 | -- O4W | .. | 11.0 su |
| PLAT232_ALERT_2_B Hirshfeld Test Diff (M-X) Dy2 | -- O11 | .. | 14.5 su |

### Alert level C

RFACG01\_ALERT\_3\_C The value of the R factor is > 0.10  
 R factor given 0.102

RFACR01\_ALERT\_3\_C The value of the weighted R factor is > 0.25  
 Weighted R factor given 0.280

RINTA01\_ALERT\_3\_C The value of Rint is greater than 0.12  
 Rint given 0.125

|                                                                     |            |
|---------------------------------------------------------------------|------------|
| PLAT020_ALERT_3_C The value of Rint is greater than 0.12 .....      | 0.125      |
| PLAT041_ALERT_1_C Calc. and Reported SumFormula Strings Differ      | ?          |
| PLAT051_ALERT_1_C Mu(calc) and Mu(CIF) Ratio Differs from 1.0 by .  | 3.08 Perc. |
| PLAT068_ALERT_1_C Reported F000 Differs from Calcd (or Missing)...  | ?          |
| PLAT084_ALERT_2_C High wR2 Value .....                              | 0.28       |
| PLAT213_ALERT_2_C Atom O2W has ADP max/min Ratio .....              | 3.2 oblat  |
| PLAT234_ALERT_4_C Large Hirshfeld Difference O9 -- C10 ..           | 0.16 Ang.  |
| PLAT242_ALERT_2_C Check Low Ueq as Compared to Neighbors for Dy1    |            |
| PLAT242_ALERT_2_C Check Low Ueq as Compared to Neighbors for Dy2    |            |
| PLAT244_ALERT_4_C Low 'Solvent' Ueq as Compared to Neighbors of Cu1 |            |
| PLAT342_ALERT_3_C Low Bond Precision on C-C Bonds .....             | 0.0140 Ang |
| PLAT431_ALERT_2_C Short Inter HL..A Contact Cl4 .. O8W .            | 3.15 Ang.  |
| PLAT431_ALERT_2_C Short Inter HL..A Contact Cl5 .. O8W .            | 3.09 Ang.  |
| PLAT431_ALERT_2_C Short Inter HL..A Contact Cl6 .. O4W .            | 3.01 Ang.  |
| PLAT431_ALERT_2_C Short Inter HL..A Contact Cl6 .. O3W .            | 3.16 Ang.  |
| PLAT431_ALERT_2_C Short Inter HL..A Contact Cl7 .. O4W .            | 3.06 Ang.  |
| PLAT790_ALERT_4_C Centre of Gravity not Within Unit Cell: Resd. #   | 1          |

C42 H42 Dy2 N28 O24

## ● Alert level G

FORMU01\_ALERT\_2\_G There is a discrepancy between the atom counts in the  
     \_chemical\_formula\_sum and the formula from the \_atom\_site\* data.  
     Atom count from \_chemical\_formula\_sum: C42 H154 Cl8 Cu1 Dy2 N28 O70  
     Atom count from the \_atom\_site data: C42 H42 Cl8 Cu1 Dy2 N28 O24  
 CELLZ01\_ALERT\_1\_G Difference between formula and atom\_site contents detected.  
 CELLZ01\_ALERT\_1\_G ALERT: Large difference may be due to a  
     symmetry error - see SYMMG tests  
     From the CIF: \_cell\_formula\_units\_Z 4  
     From the CIF: \_chemical\_formula\_sum C42 H154 Cl8 Cu Dy2 N28 O70  
     TEST: Compare cell contents of formula and atom\_site data

| atom | Z*formula | cif sites | diff   |
|------|-----------|-----------|--------|
| C    | 168.00    | 168.00    | 0.00   |
| H    | 616.00    | 168.00    | 448.00 |
| Cl   | 32.00     | 32.00     | 0.00   |
| Cu   | 4.00      | 4.00      | 0.00   |
| Dy   | 8.00      | 8.00      | 0.00   |
| N    | 112.00    | 112.00    | 0.00   |
| O    | 280.00    | 96.00     | 184.00 |

|                   |                                                    |           |
|-------------------|----------------------------------------------------|-----------|
| PLAT003_ALERT_2_G | Number of Uiso or Uij Restrained Atom Sites ....   | 64        |
| PLAT004_ALERT_5_G | Info: Polymeric Structure Found with Dimension .   | 1         |
| PLAT005_ALERT_5_G | No _iucr_refine_instructions_details in the CIF    | ?         |
| PLAT042_ALERT_1_G | Calc. and Reported MoietyFormula Strings Differ    | ?         |
| PLAT044_ALERT_1_G | Calculated and Reported Dx Differ .....            | ?         |
| PLAT072_ALERT_2_G | SHELXL First Parameter in WGHT Unusually Large.    | 0.17      |
| PLAT194_ALERT_1_G | Missing _cell_measurement_reflms_used datum ....   | ?         |
| PLAT195_ALERT_1_G | Missing _cell_measurement_theta_max datum ....     | ?         |
| PLAT196_ALERT_1_G | Missing _cell_measurement_theta_min datum ....     | ?         |
| PLAT232_ALERT_2_G | Hirshfeld Test Diff (M-X) Dy1 -- O8_b ..           | 6.2 su    |
| PLAT232_ALERT_2_G | Hirshfeld Test Diff (M-X) Dy1 -- O14_b ..          | 6.1 su    |
| PLAT232_ALERT_2_G | Hirshfeld Test Diff (M-X) Dy2 -- O6W ..            | 5.5 su    |
| PLAT232_ALERT_2_G | Hirshfeld Test Diff (M-X) Dy2 -- O5_a ..           | 7.5 su    |
| PLAT302_ALERT_4_G | Note: Anion/Solvent Disorder .....                 | 11 Perc.  |
| PLAT434_ALERT_2_G | Short Inter HL..HL Contact Cl6 .. Cl8 .            | 3.18 Ang. |
| PLAT606_ALERT_4_G | VERY LARGE Solvent Accessible VOID(S) in Structure | !         |
| PLAT790_ALERT_4_G | Centre of Gravity not Within Unit Cell: Resd. #    | 2         |
|                   | Cl4 Cu                                             |           |
| PLAT790_ALERT_4_G | Centre of Gravity not Within Unit Cell: Resd. #    | 3         |
|                   | Cl                                                 |           |
| PLAT790_ALERT_4_G | Centre of Gravity not Within Unit Cell: Resd. #    | 5         |
|                   | Cl                                                 |           |
| PLAT790_ALERT_4_G | Centre of Gravity not Within Unit Cell: Resd. #    | 7         |
|                   | Cl0.50                                             |           |
| PLAT793_ALERT_4_G | The Model has Chirality at C9 (Verify) ....        | R         |
| PLAT793_ALERT_4_G | The Model has Chirality at C14 (Verify) ....       | S         |
| PLAT793_ALERT_4_G | The Model has Chirality at C26 (Verify) ....       | S         |
| PLAT793_ALERT_4_G | The Model has Chirality at C27 (Verify) ....       | R         |
| PLAT793_ALERT_4_G | The Model has Chirality at C32 (Verify) ....       | R         |
| PLAT793_ALERT_4_G | The Model has Chirality at C33 (Verify) ....       | R         |
| PLAT793_ALERT_4_G | The Model has Chirality at C38 (Verify) ....       | R         |
| PLAT793_ALERT_4_G | The Model has Chirality at C39 (Verify) ....       | S         |
| PLAT860_ALERT_3_G | Note: Number of Least-Squares Restraints .....     | 384       |
| PLAT869_ALERT_4_G | ALERTS Related to the use of SQUEEZE Suppressed    | !         |

- 
- 3 **ALERT level A** = Most likely a serious problem - resolve or explain  
 3 **ALERT level B** = A potentially serious problem, consider carefully  
 20 **ALERT level C** = Check. Ensure it is not caused by an omission or oversight  
 33 **ALERT level G** = General information/check it is not something unexpected

10 ALERT type 1 CIF construction/syntax error, inconsistent or missing data  
 23 ALERT type 2 Indicator that the structure model may be wrong or deficient  
 6 ALERT type 3 Indicator that the structure quality may be low  
 18 ALERT type 4 Improvement, methodology, query or suggestion  
 2 ALERT type 5 Informative message, check

## Datablock: 12

Bond precision: C-C = 0.0286 Å Wavelength=0.71073

Cell: a=17.1162(13) b=27.675(2) c=20.4248(16)  
 alpha=90 beta=97.399(2) gamma=90

Temperature: 223 K

|                        | Calculated                                                        | Reported                                      |
|------------------------|-------------------------------------------------------------------|-----------------------------------------------|
| Volume                 | 9594.5(13)                                                        | 9594.4(13)                                    |
| Space group            | P 21/c                                                            | P 21/c                                        |
| Hall group             | -P 2ybc                                                           | -P 2ybc                                       |
| Moiety formula         | C42 H42 Ho2 N28 O24, Cl4<br>Co, 3(Cl0.50), Cl0.50,<br>1.5(Cl0.50) | C42 H62 Ho2 N28 O24, Co<br>Cl4, 4Cl, 55(H2 O) |
| Sum formula            | C42 H42 Cl8 Co Ho2 N28 O24                                        | C42 H172 Cl8 Co Ho2 N28<br>O79                |
| Mr                     | 1995.43                                                           | 3006.47                                       |
| Dx, g cm <sup>-3</sup> | 1.381                                                             | 2.081                                         |
| Z                      | 4                                                                 | 4                                             |
| Mu (mm <sup>-1</sup> ) | 2.096                                                             | 2.174                                         |
| F000                   | 3916.0                                                            | 6196.0                                        |
| F000'                  | 3921.83                                                           |                                               |
| h,k,lmax               | 21,34,25                                                          | 21,33,25                                      |
| Nref                   | 18841                                                             | 18676                                         |
| Tmin,Tmax              | 0.648,0.722                                                       | 0.658,0.736                                   |
| Tmin'                  | 0.627                                                             |                                               |

Correction method= MULTI-SCAN

Data completeness= 0.991 Theta(max)= 26.000

R(reflections)= 0.0890( 10691) wR2(reflections)= 0.2583( 18676)

S = 1.030 Npar= 952

The following ALERTS were generated. Each ALERT has the format  
**test-name\_ALERT\_alert-type\_alert-level.**  
 Click on the hyperlinks for more details of the test.

 **Alert level A**

CHEMW03\_ALERT\_2\_A ALERT: The ratio of given/expected molecular weight as calculated from the \_atom\_site\* data lies outside the range 0.90 <> 1.10

From the CIF: \_cell\_formula\_units\_Z 4

From the CIF: \_chemical\_formula\_weight 3006.47

TEST: Calculate formula weight from \_atom\_site\*

| atom                      | mass   | num   | sum     |
|---------------------------|--------|-------|---------|
| C                         | 12.01  | 42.00 | 504.46  |
| H                         | 1.01   | 42.00 | 42.34   |
| N                         | 14.01  | 28.00 | 392.20  |
| O                         | 16.00  | 24.00 | 383.98  |
| Cl                        | 35.45  | 8.00  | 283.62  |
| Ho                        | 164.93 | 2.00  | 329.86  |
| Co                        | 58.93  | 1.00  | 58.93   |
| Calculated formula weight |        |       | 1995.39 |

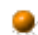

### Alert level B

PLAT342\_ALERT\_3\_B Low Bond Precision on C-C Bonds ..... 0.0286 Ang

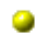

### Alert level C

RFACR01\_ALERT\_3\_C The value of the weighted R factor is > 0.25

Weighted R factor given 0.258

PLAT041\_ALERT\_1\_C Calc. and Reported SumFormula Strings Differ ?

PLAT051\_ALERT\_1\_C Mu(calc) and Mu(CIF) Ratio Differs from 1.0 by . 3.59 Perc.

PLAT068\_ALERT\_1\_C Reported F000 Differs from Calcd (or Missing)... ?

PLAT084\_ALERT\_2\_C High wR2 Value ..... 0.26

PLAT094\_ALERT\_2\_C Ratio of Maximum / Minimum Residual Density .... 2.19

PLAT234\_ALERT\_4\_C Large Hirshfeld Difference N16 -- Cl8 .. 0.17 Ang.

PLAT242\_ALERT\_2\_C Check Low Ueq as Compared to Neighbors for Ho1

PLAT242\_ALERT\_2\_C Check Low Ueq as Compared to Neighbors for Ho2

PLAT431\_ALERT\_2\_C Short Inter HL..A Contact Cl6 .. O7W . 3.12 Ang.

PLAT431\_ALERT\_2\_C Short Inter HL..A Contact Cl7 .. O10W . 2.99 Ang.

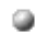

### Alert level G

FORMU01\_ALERT\_2\_G There is a discrepancy between the atom counts in the \_chemical\_formula\_sum and the formula from the \_atom\_site\* data.

Atom count from \_chemical\_formula\_sum: C42 H172 Cl8 Co1 Ho2 N28 O79

Atom count from the \_atom\_site data: C42 H42 Cl8 Co1 Ho2 N28 O24

CELLZ01\_ALERT\_1\_G Difference between formula and atom\_site contents detected.

CELLZ01\_ALERT\_1\_G ALERT: Large difference may be due to a symmetry error - see SYMMG tests

From the CIF: \_cell\_formula\_units\_Z 4

From the CIF: \_chemical\_formula\_sum C42 H172 Cl8 Co Ho2 N28 O79

TEST: Compare cell contents of formula and atom\_site data

| atom | Z*formula | cif sites | diff   |
|------|-----------|-----------|--------|
| C    | 168.00    | 168.00    | 0.00   |
| H    | 688.00    | 168.00    | 520.00 |
| Cl   | 32.00     | 32.00     | 0.00   |
| Co   | 4.00      | 4.00      | 0.00   |
| Ho   | 8.00      | 8.00      | 0.00   |
| N    | 112.00    | 112.00    | 0.00   |
| O    | 316.00    | 96.00     | 220.00 |

PLAT002\_ALERT\_2\_G Number of Distance or Angle Restraints on AtSite 3

PLAT003\_ALERT\_2\_G Number of Uiso or Uij Restrained Atom Sites .... 6

PLAT004\_ALERT\_5\_G Info: Polymeric Structure Found with Dimension . 1

PLAT005\_ALERT\_5\_G No \_iucr\_refine\_instructions\_details in the CIF ?

PLAT042\_ALERT\_1\_G Calc. and Reported MoietyFormula Strings Differ ?

|                   |                                                    |           |
|-------------------|----------------------------------------------------|-----------|
| PLAT044_ALERT_1_G | Calculated and Reported Dx Differ .....            | ?         |
| PLAT072_ALERT_2_G | SHELXL First Parameter in WGHT Unusually Large.    | 0.15      |
| PLAT194_ALERT_1_G | Missing _cell_measurement_reflms_used datum ....   | ?         |
| PLAT195_ALERT_1_G | Missing _cell_measurement_theta_max datum ....     | ?         |
| PLAT196_ALERT_1_G | Missing _cell_measurement_theta_min datum ....     | ?         |
| PLAT302_ALERT_4_G | Note: Anion/Solvent Disorder .....                 | 22 Perc.  |
| PLAT434_ALERT_2_G | Short Inter HL..HL Contact C17 .. C19 ..           | 2.67 Ang. |
| PLAT606_ALERT_4_G | VERY LARGE Solvent Accessible VOID(S) in Structure | !         |
| PLAT790_ALERT_4_G | Centre of Gravity not Within Unit Cell: Resd. #    | 4         |
|                   | C1                                                 |           |
| PLAT790_ALERT_4_G | Centre of Gravity not Within Unit Cell: Resd. #    | 6         |
|                   | C10.50                                             |           |
| PLAT790_ALERT_4_G | Centre of Gravity not Within Unit Cell: Resd. #    | 7         |
|                   | C1                                                 |           |
| PLAT793_ALERT_4_G | The Model has Chirality at C3 (Verify) ....        | R         |
| PLAT793_ALERT_4_G | The Model has Chirality at C4 (Verify) ....        | S         |
| PLAT793_ALERT_4_G | The Model has Chirality at C9 (Verify) ....        | R         |
| PLAT793_ALERT_4_G | The Model has Chirality at C10 (Verify) ....       | S         |
| PLAT793_ALERT_4_G | The Model has Chirality at C22 (Verify) ....       | R         |
| PLAT793_ALERT_4_G | The Model has Chirality at C28 (Verify) ....       | R         |
| PLAT793_ALERT_4_G | The Model has Chirality at C40 (Verify) ....       | S         |
| PLAT793_ALERT_4_G | The Model has Chirality at C44 (Verify) ....       | R         |
| PLAT860_ALERT_3_G | Note: Number of Least-Squares Restraints .....     | 40        |
| PLAT869_ALERT_4_G | ALERTS Related to the use of SQUEEZE Suppressed    | !         |

- 
- 1 **ALERT level A** = Most likely a serious problem - resolve or explain
  - 1 **ALERT level B** = A potentially serious problem, consider carefully
  - 11 **ALERT level C** = Check. Ensure it is not caused by an omission or oversight
  - 29 **ALERT level G** = General information/check it is not something unexpected

- 10 ALERT type 1 CIF construction/syntax error, inconsistent or missing data
  - 12 ALERT type 2 Indicator that the structure model may be wrong or deficient
  - 3 ALERT type 3 Indicator that the structure quality may be low
  - 15 ALERT type 4 Improvement, methodology, query or suggestion
  - 2 ALERT type 5 Informative message, check
- 

## checkCIF publication errors

---

### Alert level A

PUBL004\_ALERT\_1\_A The contact author's name and address are missing,  
\_publ\_contact\_author\_name and \_publ\_contact\_author\_address.

PUBL005\_ALERT\_1\_A \_publ\_contact\_author\_email, \_publ\_contact\_author\_fax and  
\_publ\_contact\_author\_phone are all missing.  
At least one of these should be present.

PUBL006\_ALERT\_1\_A \_publ\_requested\_journal is missing  
e.g. 'Acta Crystallographica Section C'

PUBL008\_ALERT\_1\_A \_publ\_section\_title is missing. Title of paper.

PUBL009\_ALERT\_1\_A \_publ\_author\_name is missing. List of author(s) name(s).

PUBL010\_ALERT\_1\_A \_publ\_author\_address is missing. Author(s) address(es).

PUBL012\_ALERT\_1\_A \_publ\_section\_abstract is missing.  
Abstract of paper in English.

---

### Alert level G

PUBL013\_ALERT\_1\_G The \_publ\_section\_comment (discussion of study) is  
missing. This is required for a full paper submission (but is  
optional for an electronic paper).



PUBL017\_ALERT\_1\_G The \_publ\_section\_references section is missing or empty.

---

7 **ALERT level A** = Data missing that is essential or data in wrong format  
2 **ALERT level G** = General alerts. Data that may be required is missing

---

## Publication of your CIF

You should attempt to resolve as many as possible of the alerts in all categories. Often the minor alerts point to easily fixed oversights, errors and omissions in your CIF or refinement strategy, so attention to these fine details can be worthwhile. In order to resolve some of the more serious problems it may be necessary to carry out additional measurements or structure refinements. However, the nature of your study may justify the reported deviations from journal submission requirements and the more serious of these should be commented upon in the discussion or experimental section of a paper or in the "special\_details" fields of the CIF. *checkCIF* was carefully designed to identify outliers and unusual parameters, but every test has its limitations and alerts that are not important in a particular case may appear. Conversely, the absence of alerts does not guarantee there are no aspects of the results needing attention. It is up to the individual to critically assess their own results and, if necessary, seek expert advice.

If level A alerts remain, which you believe to be justified deviations, and you intend to submit this CIF for publication in Acta Crystallographica Section C or Section E, you should additionally insert an explanation in your CIF using the Validation Reply Form (VRF) below. Your explanation will be considered as part of the review process.

If you intend to submit to another section of Acta Crystallographica or Journal of Applied Crystallography or Journal of Synchrotron Radiation, you should make sure that at least a basic structural check is run on the final version of your CIF prior to submission.

```
# start Validation Reply Form
_vrf_PUBL004_GLOBAL
;
PROBLEM: The contact author's name and address are missing,
RESPONSE: ...
;
_vrf_PUBL005_GLOBAL
;
PROBLEM: _publ_contact_author_email, _publ_contact_author_fax and
RESPONSE: ...
;
_vrf_PUBL006_GLOBAL
;
PROBLEM: _publ_requested_journal is missing
RESPONSE: ...
;
_vrf_PUBL008_GLOBAL
;
PROBLEM: _publ_section_title is missing. Title of paper.
RESPONSE: ...
;
_vrf_PUBL009_GLOBAL
;
PROBLEM: _publ_author_name is missing. List of author(s) name(s).
RESPONSE: ...
```

```

;
_vrf_PUBL010_GLOBAL
;
PROBLEM: _publ_author_address is missing. Author(s) address(es).
RESPONSE: ...
;
_vrf_PUBL012_GLOBAL
;
PROBLEM: _publ_section_abstract is missing.
RESPONSE: ...
;
_vrf_CHEMW03_01
;
PROBLEM: ALERT: The ratio of given/expected molecular weight as
RESPONSE: ...
;
_vrf_PLAT029_01
;
PROBLEM: _diffn_measured_fraction_theta_full Low ..... 0.936
RESPONSE: ...
;
_vrf_CHEMW03_02
;
PROBLEM: ALERT: The ratio of given/expected molecular weight as
RESPONSE: ...
;
_vrf_CHEMW03_03
;
PROBLEM: ALERT: The ratio of given/expected molecular weight as
RESPONSE: ...
;
_vrf_CHEMW03_04
;
PROBLEM: ALERT: The ratio of given/expected molecular weight as
RESPONSE: ...
;
_vrf_CHEMW03_05
;
PROBLEM: ALERT: The ratio of given/expected molecular weight as
RESPONSE: ...
;
_vrf_CHEMW03_06
;
PROBLEM: ALERT: The ratio of given/expected molecular weight as
RESPONSE: ...
;
_vrf_CHEMW03_07
;
PROBLEM: ALERT: The ratio of given/expected molecular weight as
RESPONSE: ...
;
_vrf_PLAT434_07
;
PROBLEM: Short Inter HL..HL Contact  C18    ..  C18    .        2.40 Ang.
RESPONSE: ...
;
_vrf_CHEMW03_08
;
PROBLEM: ALERT: The ratio of given/expected molecular weight as
RESPONSE: ...
;
_vrf_PLAT410_08

```

```

;
PROBLEM: Short Intra H...H Contact  H27      ..  H30B      ..      1.76 Ang.
RESPONSE: ...
;
_vrf_CHEMW03_09
;
PROBLEM: ALERT: The ratio of given/expected molecular weight as
RESPONSE: ...
;
_vrf_CHEMW03_10
;
PROBLEM: ALERT: The ratio of given/expected molecular weight as
RESPONSE: ...
;
_vrf_PLAT213_10
;
PROBLEM: Atom N22                has ADP max/min Ratio .....      5.3 prola
RESPONSE: ...
;
_vrf_CHEMW03_11
;
PROBLEM: ALERT: The ratio of given/expected molecular weight as
RESPONSE: ...
;
_vrf_PLAT213_11
;
PROBLEM: Atom Dyl                has ADP max/min Ratio .....      7.7 oblat
RESPONSE: ...
;
_vrf_CHEMW03_12
;
PROBLEM: ALERT: The ratio of given/expected molecular weight as
RESPONSE: ...
;
# end Validation Reply Form

```

If you wish to submit your CIF for publication in Acta Crystallographica Section C or E, you should upload your CIF via the web. If your CIF is to form part of a submission to another IUCr journal, you will be asked, either during electronic submission or by the Co-editor handling your paper, to upload your CIF via our web site.

---

**PLATON version of 05/11/2012; check.def file version of 05/11/2012**

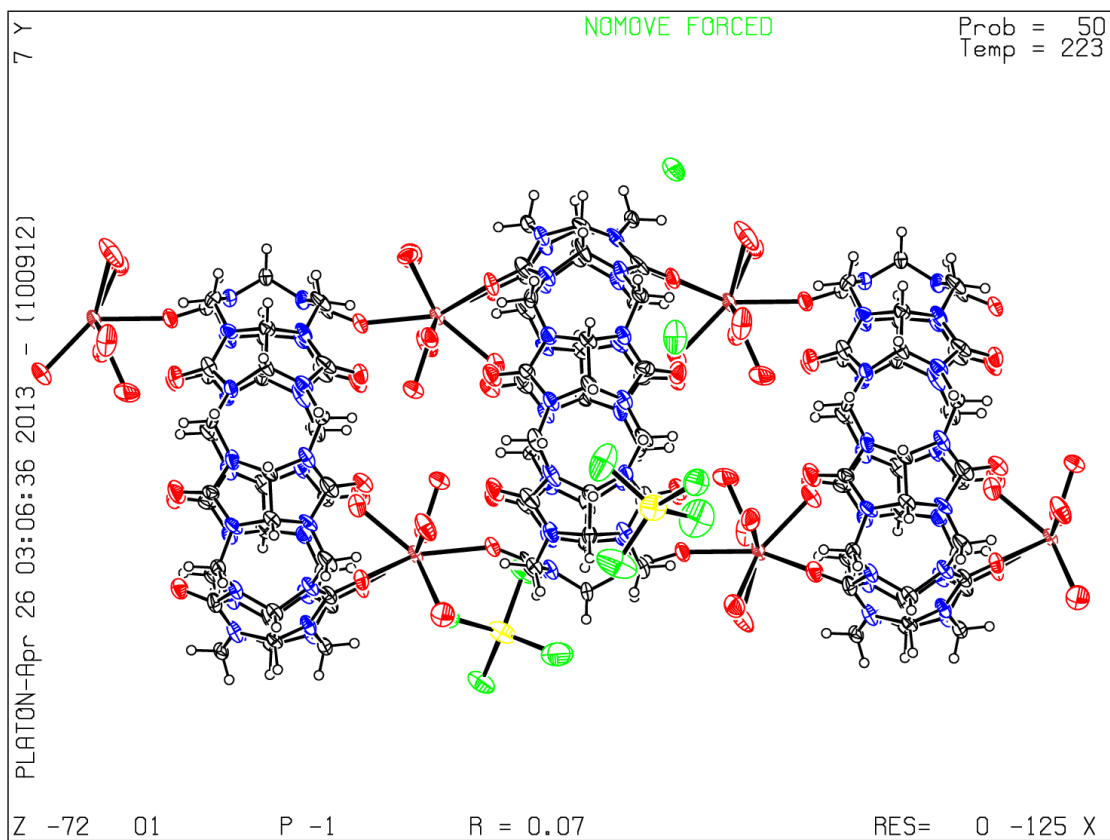

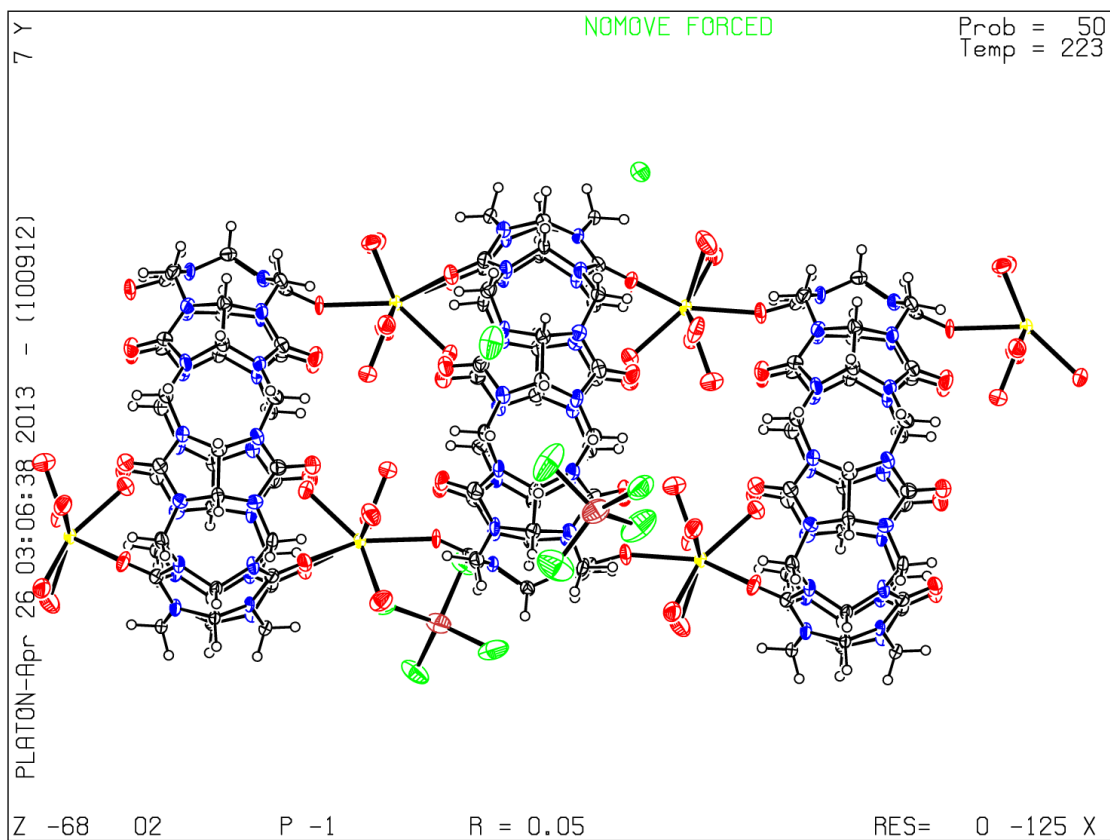

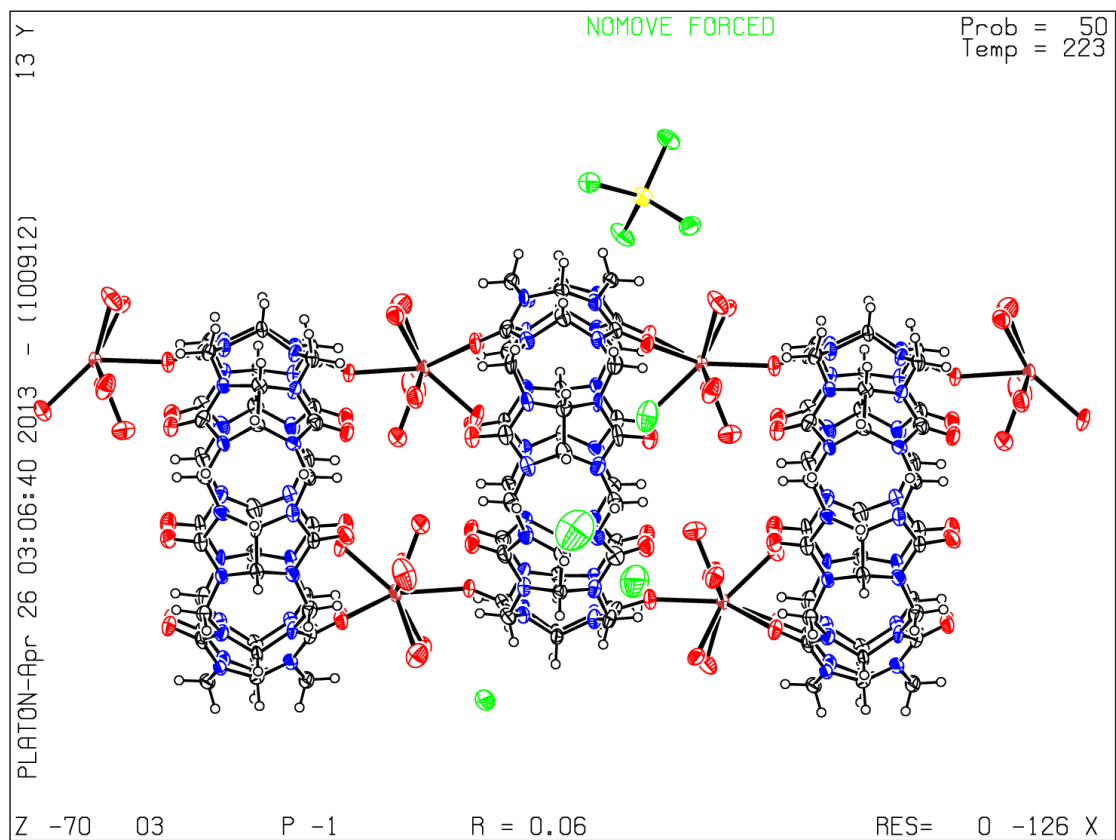

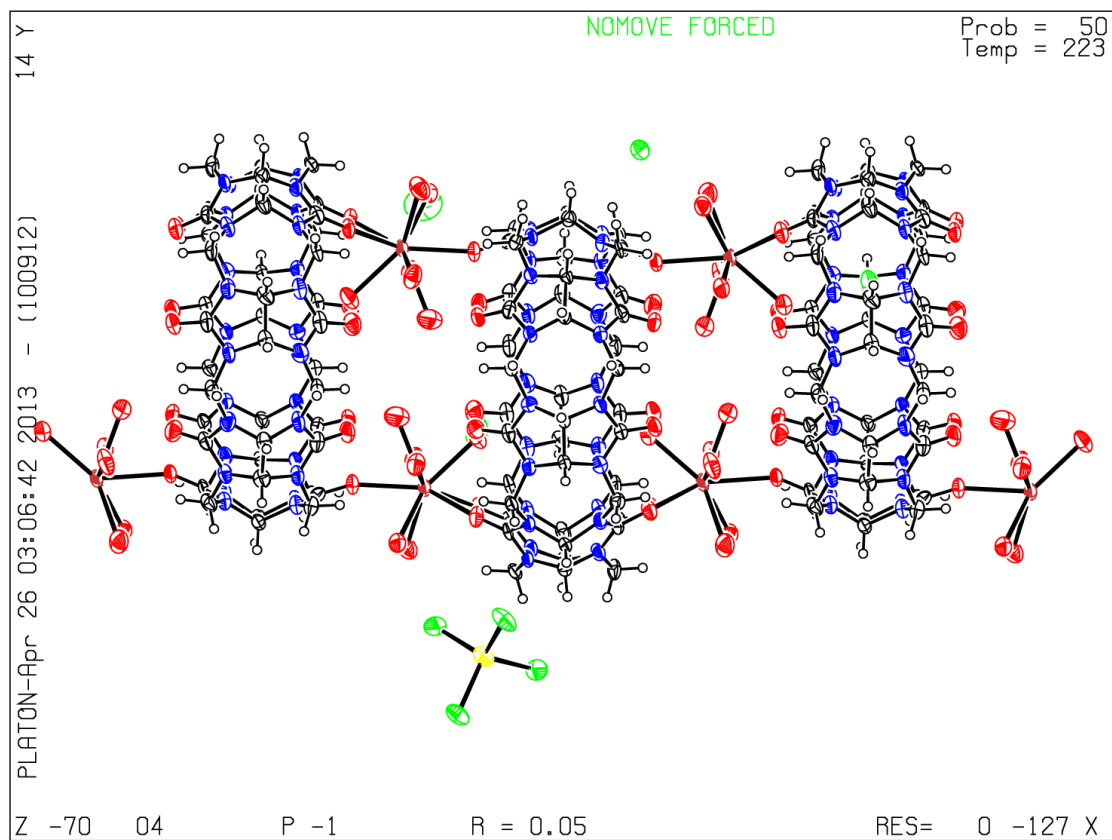

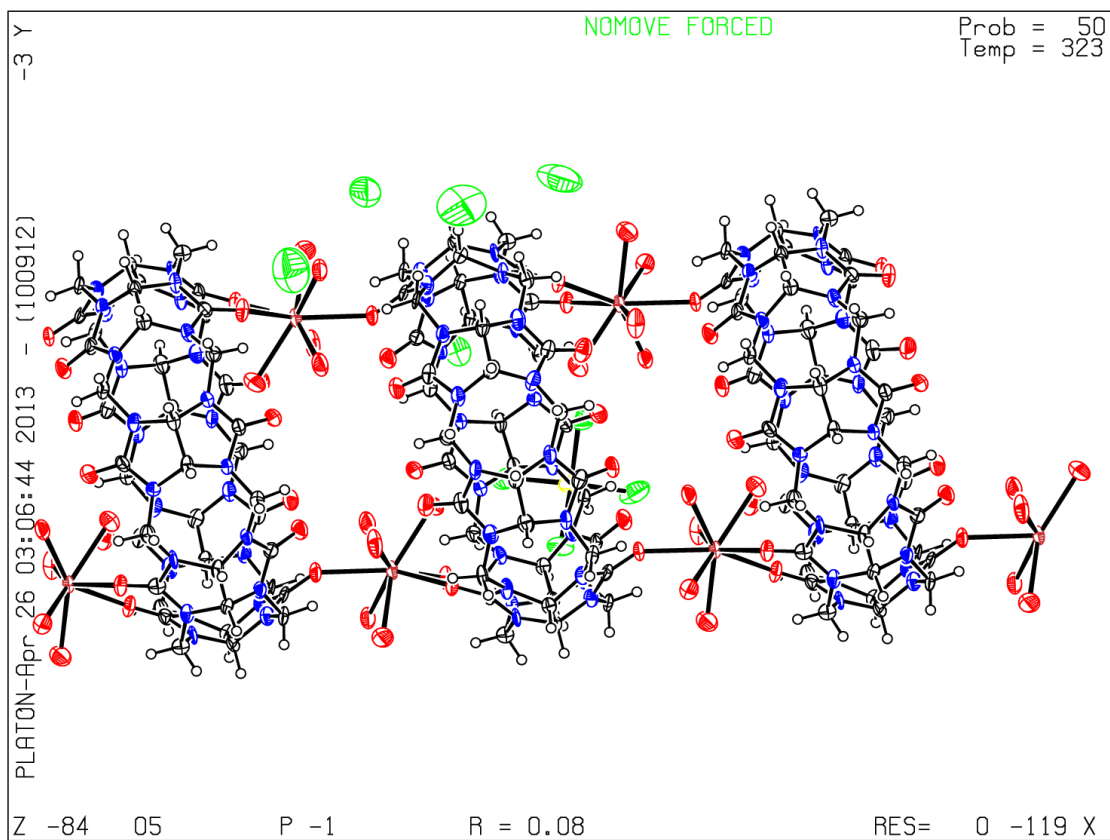



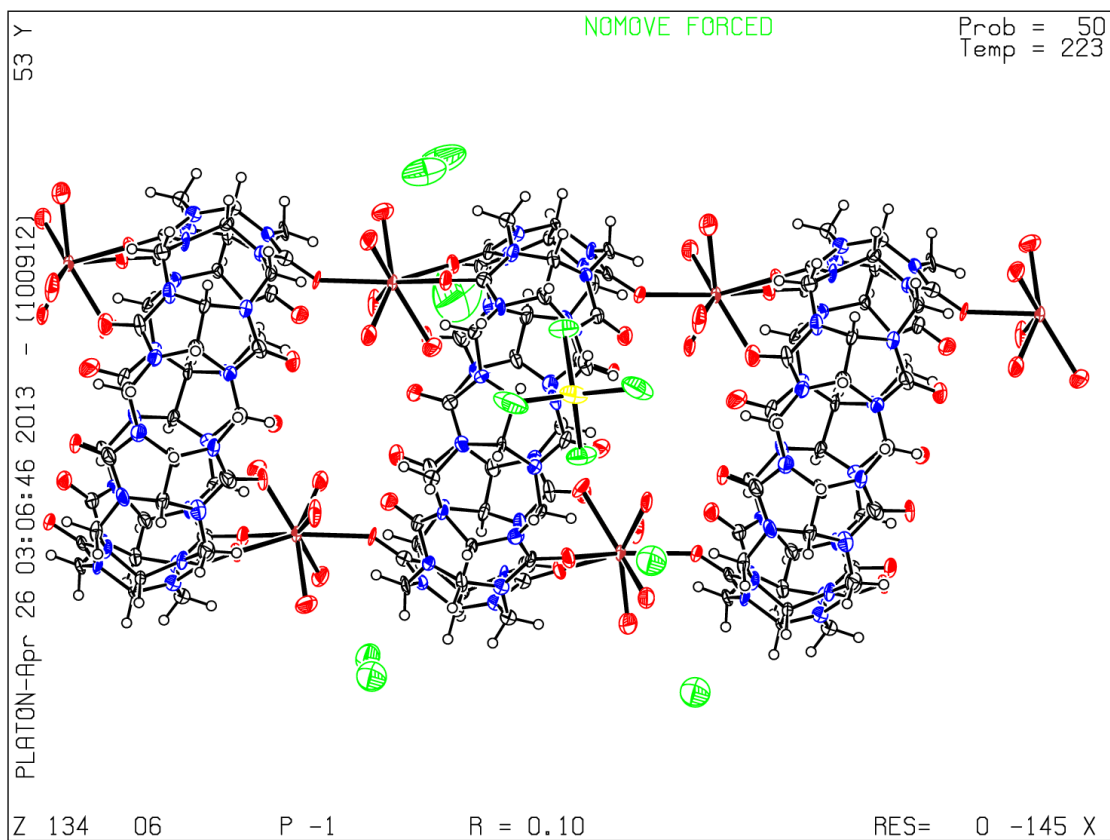

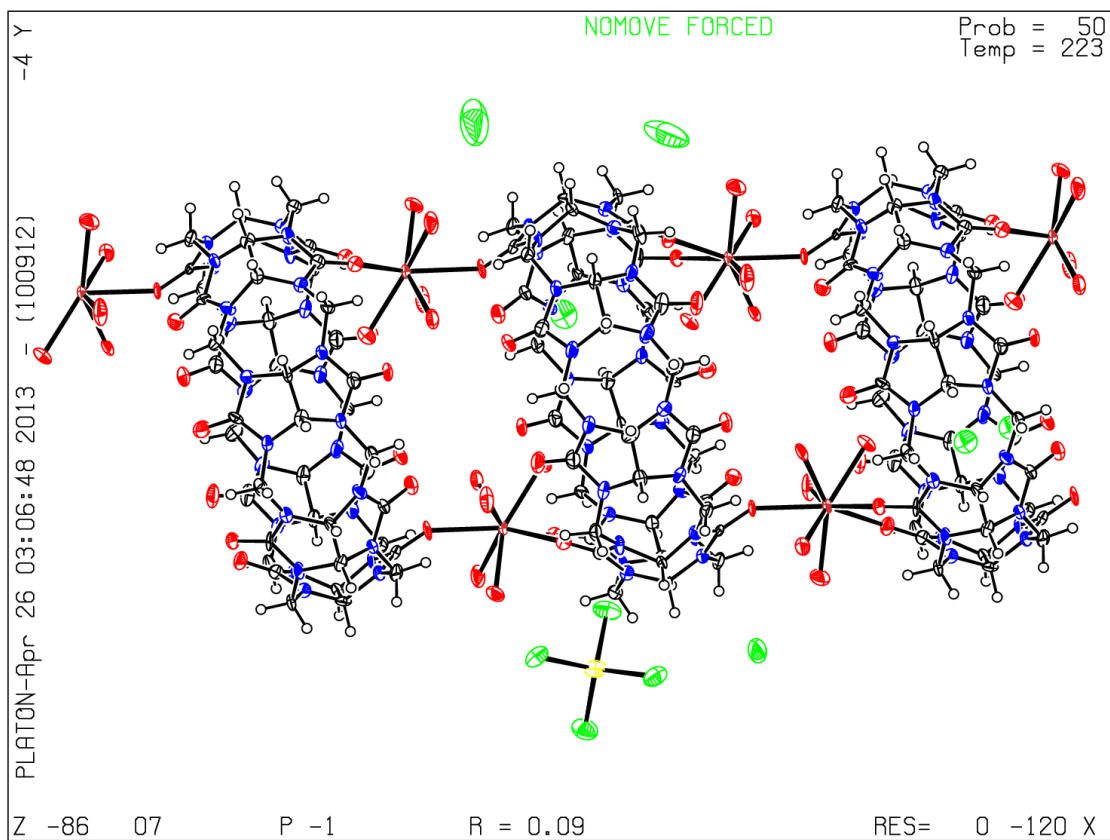

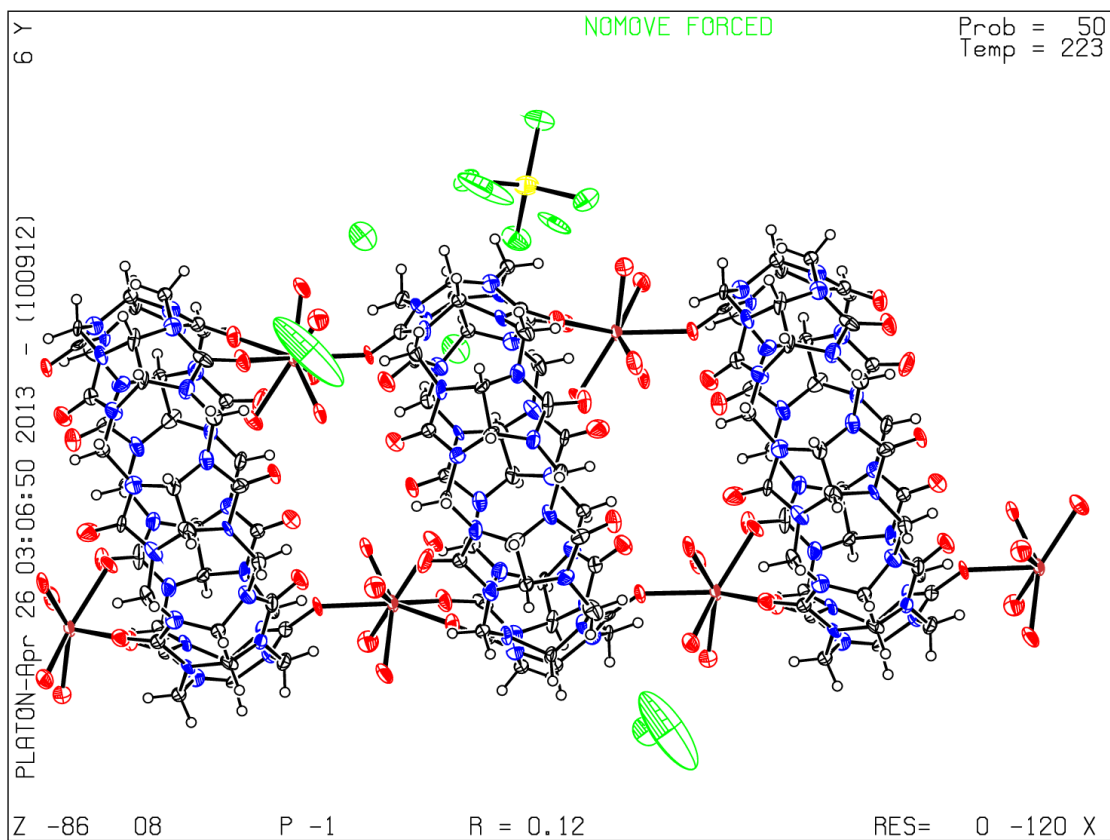

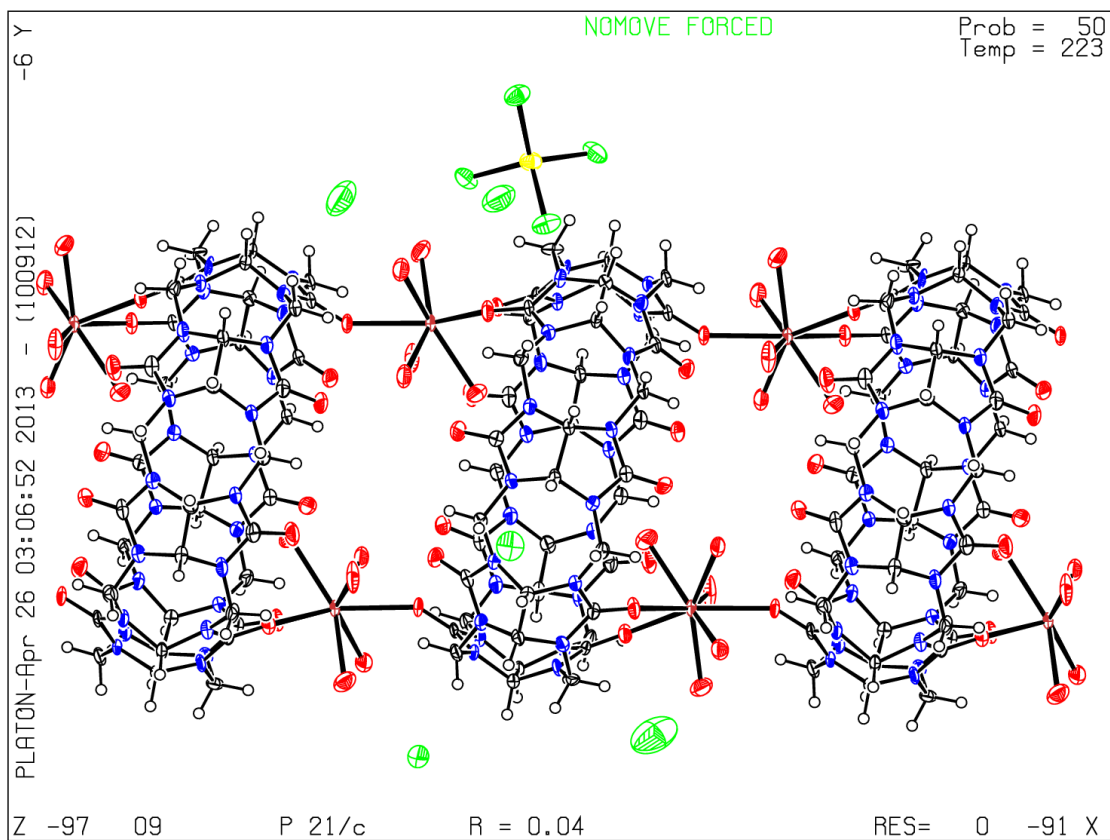

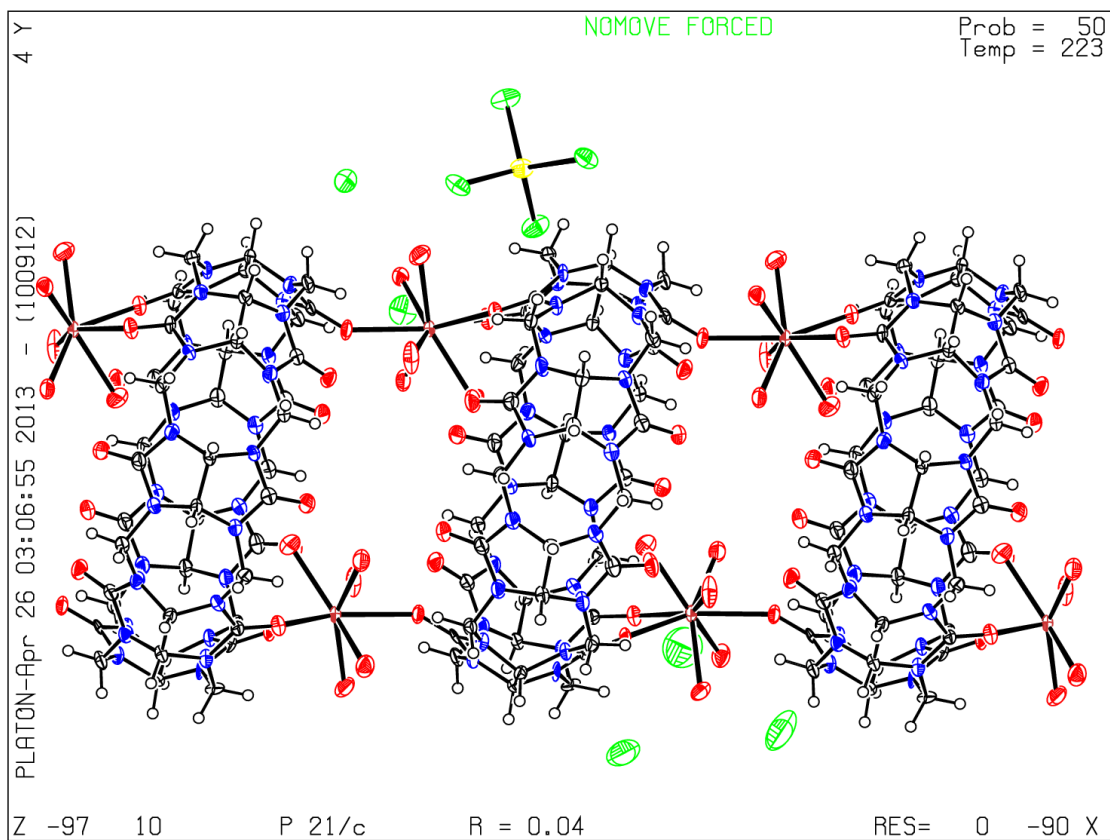

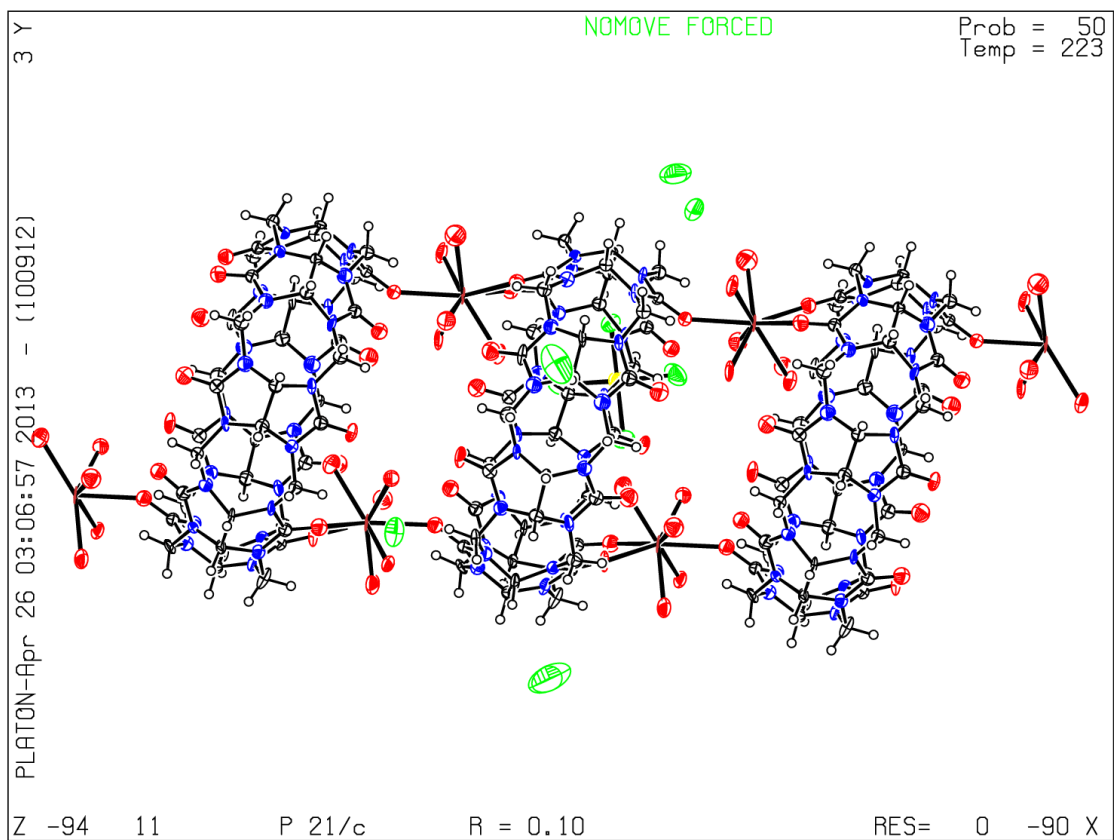

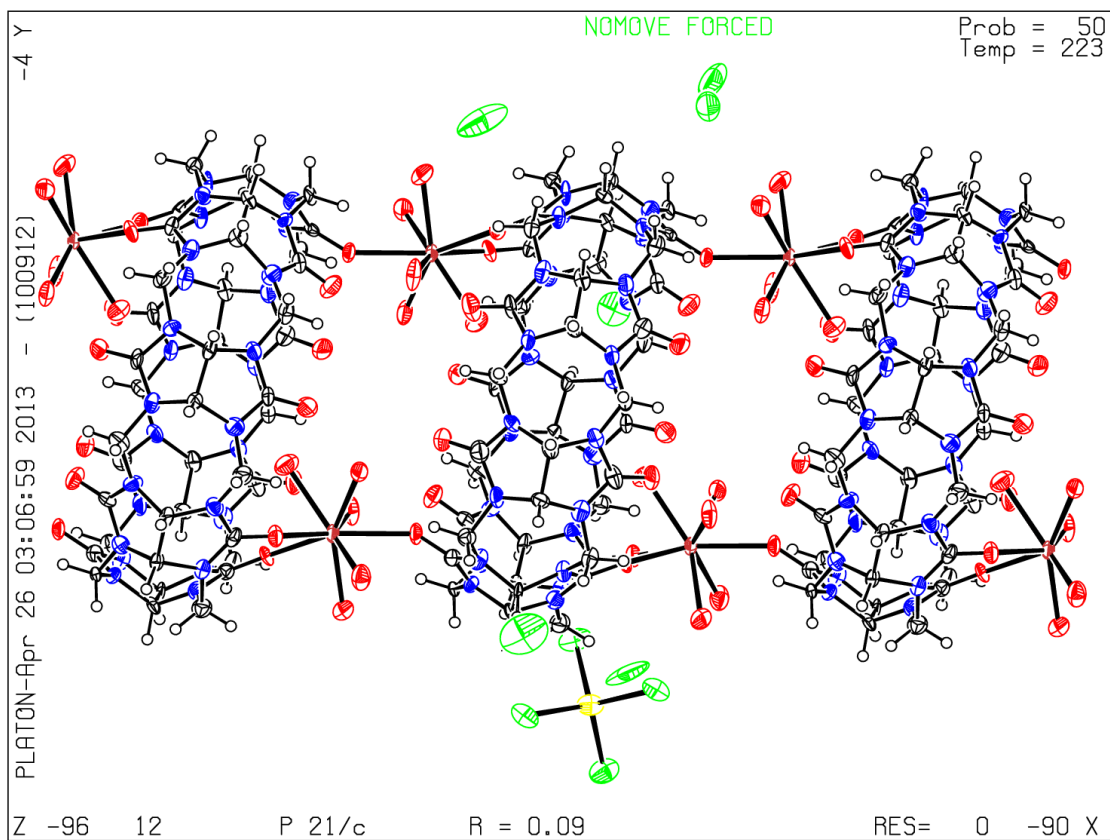

Supplement: s1 [file s1]
