# Supplementary material
Source: MDPI journal article supplement (https://www.mdpi.com/2073-4360/5/2/418)
Supplement: s1 [file s1]

## Supporting Information

**Table S1.** Elemental analysis results (%).

| <b>Results</b> | <b>1</b> | <b>2</b> | <b>3</b> | <b>4</b> | <b>5</b> | <b>6</b> | <b>7</b> | <b>8</b> | <b>9</b> | <b>10</b> | <b>11</b> | <b>12</b> |
|----------------|----------|----------|----------|----------|----------|----------|----------|----------|----------|-----------|-----------|-----------|
| C calculate    | 19.09    | 19.01    | 19.72    | 20.44    | 18.71    | 18.16    | 18.59    | 17.60    | 19.39    | 19.32     | 17.74     | 16.75     |
| found          | 18.99    | 18.87    | 19.71    | 20.27    | 18.79    | 18.01    | 18.79    | 17.84    | 19.27    | 19.23     | 18.00     | 17.05     |
| H calculate    | 4.65     | 4.63     | 5.04     | 4.82     | 5.24     | 5.37     | 5.20     | 5.48     | 5.04     | 5.02      | 5.46      | 5.76      |
| found          | 4.45     | 4.53     | 5.01     | 4.62     | 5.04     | 5.27     | 5.01     | 5.28     | 4.94     | 4.89      | 5.16      | 5.46      |
| N calculate    | 14.84    | 14.78    | 15.33    | 15.90    | 14.56    | 14.13    | 14.45    | 13.68    | 15.08    | 15.03     | 13.79     | 13.03     |
| found          | 14.98    | 14.87    | 15.57    | 15.99    | 14.82    | 14.20    | 14.55    | 13.74    | 15.23    | 15.17     | 13.99     | 13.32     |

**Table S2.** Crystal data and structure refinement details for compounds in the second and third isomorphous groups.

| Compound                   | 1                                                                                                                    | 2                                                                                                                    | 3                                                                                                     | 4                                                                                                     | 5                                                                                                     | 6                                                                                                     | 7                                                                                                                 | 8                                                                                                                 | 9                                                                                                                 | 10                                                                                                                | 11                                                                                                                | 12                                                                                                                |
|----------------------------|----------------------------------------------------------------------------------------------------------------------|----------------------------------------------------------------------------------------------------------------------|-------------------------------------------------------------------------------------------------------|-------------------------------------------------------------------------------------------------------|-------------------------------------------------------------------------------------------------------|-------------------------------------------------------------------------------------------------------|-------------------------------------------------------------------------------------------------------------------|-------------------------------------------------------------------------------------------------------------------|-------------------------------------------------------------------------------------------------------------------|-------------------------------------------------------------------------------------------------------------------|-------------------------------------------------------------------------------------------------------------------|-------------------------------------------------------------------------------------------------------------------|
| Empirical formula          | C <sub>42</sub> H <sub>122</sub> N <sub>28</sub> O<br><sub>54</sub> Cu <sub>2</sub> La <sub>2</sub> Cl <sub>10</sub> | C <sub>42</sub> H <sub>122</sub> N <sub>28</sub> O<br><sub>54</sub> Cu <sub>2</sub> Nd <sub>2</sub> Cl <sub>10</sub> | C <sub>42</sub> H <sub>128</sub> N <sub>28</sub> O<br><sub>57</sub> CoLa <sub>2</sub> Cl <sub>8</sub> | C <sub>42</sub> H <sub>118</sub> N <sub>28</sub> O <sub>52</sub><br>CoCe <sub>2</sub> Cl <sub>8</sub> | C <sub>42</sub> H <sub>140</sub> N <sub>28</sub> O<br><sub>63</sub> CuEu <sub>2</sub> Cl <sub>8</sub> | C <sub>42</sub> H <sub>148</sub> N <sub>28</sub> O<br><sub>67</sub> CuGd <sub>2</sub> Cl <sub>8</sub> | C <sub>42</sub> H <sub>140</sub> N <sub>28</sub> O <sub>6</sub><br><sub>3</sub> CoDy <sub>2</sub> Cl <sub>8</sub> | C <sub>42</sub> H <sub>156</sub> N <sub>28</sub> O <sub>7</sub><br><sub>1</sub> CoEr <sub>2</sub> Cl <sub>8</sub> | C <sub>42</sub> H <sub>130</sub> N <sub>28</sub> O <sub>5</sub><br><sub>8</sub> CoEu <sub>2</sub> Cl <sub>8</sub> | C <sub>42</sub> H <sub>130</sub> N <sub>28</sub> O <sub>5</sub><br><sub>8</sub> CoGd <sub>2</sub> Cl <sub>8</sub> | C <sub>42</sub> H <sub>154</sub> N <sub>28</sub> O <sub>7</sub><br><sub>6</sub> CuDy <sub>2</sub> Cl <sub>8</sub> | C <sub>42</sub> H <sub>172</sub> N <sub>28</sub> O <sub>7</sub><br><sub>9</sub> CuHo <sub>2</sub> Cl <sub>8</sub> |
| Formula weight             | 2643.08                                                                                                              | 2653.74                                                                                                              | 2558.07                                                                                               | 2470.41                                                                                               | 2696.88                                                                                               | 2779.52                                                                                               | 2713.35                                                                                                           | 2867.00                                                                                                           | 2602.19                                                                                                           | 2612.77                                                                                                           | 2844.07                                                                                                           | 3006.47                                                                                                           |
| Crystal system             | triclinic                                                                                                            | triclinic                                                                                                            | triclinic                                                                                             | triclinic                                                                                             | triclinic                                                                                             | triclinic                                                                                             | triclinic                                                                                                         | triclinic                                                                                                         | monoclinic                                                                                                        | monoclinic                                                                                                        | monoclinic                                                                                                        | monoclinic                                                                                                        |
| Spacegroup                 | P-1                                                                                                                  | P-1                                                                                                                  | P-1                                                                                                   | P-1                                                                                                   | P-1                                                                                                   | P-1                                                                                                   | P-1                                                                                                               | P-1                                                                                                               | P21/c                                                                                                             | P21/c                                                                                                             | P21/c                                                                                                             | P21/c                                                                                                             |
| a, Å                       | 17.267(6)                                                                                                            | 17.2440(6)                                                                                                           | 17.1376(9)                                                                                            | 17.0773(11)                                                                                           | 17.0566(17)                                                                                           | 17.045(4)                                                                                             | 16.979(3)                                                                                                         | 17.085(4)                                                                                                         | 17.0739(11)                                                                                                       | 17.0997(11)                                                                                                       | 17.084(2)                                                                                                         | 17.1162(13)                                                                                                       |
| b, Å                       | 17.380(6)                                                                                                            | 17.3617(6)                                                                                                           | 17.4128(8)                                                                                            | 17.3435(11)                                                                                           | 17.1421(17)                                                                                           | 17.080(4)                                                                                             | 17.140(3)                                                                                                         | 17.228(4)                                                                                                         | 27.7218(18)                                                                                                       | 27.7353(19)                                                                                                       | 27.493(4)                                                                                                         | 27.675(2)                                                                                                         |
| c, Å                       | 18.306(10)                                                                                                           | 18.1955(11)                                                                                                          | 18.4104(9)                                                                                            | 18.243(2)                                                                                             | 20.041(3)                                                                                             | 19.983(7)                                                                                             | 20.168(3)                                                                                                         | 20.219(6)                                                                                                         | 20.6280(14)                                                                                                       | 20.6163(13)                                                                                                       | 20.428(3)                                                                                                         | 20.4248(16)                                                                                                       |
| α, deg                     | 102.659(5)                                                                                                           | 102.902(2)                                                                                                           | 103.314(2)                                                                                            | 103.410(3)                                                                                            | 97.415(5)                                                                                             | 112.825(11)                                                                                           | 97.223(7)                                                                                                         | 97.325(10)                                                                                                        | 90.00                                                                                                             | 90.00                                                                                                             | 90.00                                                                                                             | 90.00                                                                                                             |
| β, deg                     | 103.677(5)                                                                                                           | 103.810(2)                                                                                                           | 103.349(2)                                                                                            | 103.249(3)                                                                                            | 112.647(5)                                                                                            | 96.852(11)                                                                                            | 113.441(6)                                                                                                        | 113.561(7)                                                                                                        | 97.558(2)                                                                                                         | 97.468(2)                                                                                                         | 99.261(4)                                                                                                         | 97.399(2)                                                                                                         |
| γ, deg                     | 110.207(3)                                                                                                           | 110.4590(10)                                                                                                         | 110.196(2)                                                                                            | 110.144(2)                                                                                            | 111.089(4)                                                                                            | 111.574(8)                                                                                            | 111.556(6)                                                                                                        | 111.615(7)                                                                                                        | 90.00                                                                                                             | 90.00                                                                                                             | 90.00                                                                                                             | 90.00                                                                                                             |
| V, Å <sup>3</sup>          | 4729(3)                                                                                                              | 4666.2(4)                                                                                                            | 4718.9(4)                                                                                             | 4643.2(7)                                                                                             | 4795.8(10)                                                                                            | 4748(2)                                                                                               | 4747.3(14)                                                                                                        | 4801(2)                                                                                                           | 9678.8(11)                                                                                                        | 9694.7(11)                                                                                                        | 9470(2)                                                                                                           | 9594.4(13)                                                                                                        |
| Z                          | 2                                                                                                                    | 2                                                                                                                    | 2                                                                                                     | 2                                                                                                     | 2                                                                                                     | 2                                                                                                     | 2                                                                                                                 | 2                                                                                                                 | 4                                                                                                                 | 4                                                                                                                 | 4                                                                                                                 | 4                                                                                                                 |
| Dealed, g cm <sup>-3</sup> | 1.856                                                                                                                | 1.889                                                                                                                | 1.800                                                                                                 | 1.767                                                                                                 | 1.868                                                                                                 | 1.944                                                                                                 | 1.898                                                                                                             | 1.983                                                                                                             | 1.787                                                                                                             | 1.790                                                                                                             | 1.995                                                                                                             | 2.081                                                                                                             |
| T, K                       | 223                                                                                                                  | 223                                                                                                                  | 223                                                                                                   | 223                                                                                                   | 223                                                                                                   | 223                                                                                                   | 223                                                                                                               | 223                                                                                                               | 223                                                                                                               | 223                                                                                                               | 223                                                                                                               | 223                                                                                                               |
| μ, mm <sup>-1</sup>        | 1.726                                                                                                                | 1.946                                                                                                                | 1.407                                                                                                 | 1.483                                                                                                 | 1.859                                                                                                 | 1.959                                                                                                 | 2.081                                                                                                             | 2.261                                                                                                             | 1.787                                                                                                             | 1.858                                                                                                             | 2.146                                                                                                             | 2.174                                                                                                             |
| Unique reflns              | 16672                                                                                                                | 16427                                                                                                                | 16635                                                                                                 | 16543                                                                                                 | 16826                                                                                                 | 16910                                                                                                 | 16666                                                                                                             | 16592                                                                                                             | 17146                                                                                                             | 17169                                                                                                             | 18333                                                                                                             | 18676                                                                                                             |
| Obsd reflns                | 9307                                                                                                                 | 13482                                                                                                                | 11474                                                                                                 | 12136                                                                                                 | 13122                                                                                                 | 12439                                                                                                 | 12014                                                                                                             | 10343                                                                                                             | 12777                                                                                                             | 12787                                                                                                             | 10670                                                                                                             | 10691                                                                                                             |
| Params                     | 991                                                                                                                  | 991                                                                                                                  | 964                                                                                                   | 964                                                                                                   | 932                                                                                                   | 911                                                                                                   | 962                                                                                                               | 857                                                                                                               | 949                                                                                                               | 955                                                                                                               | 955                                                                                                               | 952                                                                                                               |
| Rint                       | 0.0540                                                                                                               | 0.0422                                                                                                               | 0.0782                                                                                                | 0.0624                                                                                                | 0.0747                                                                                                | 0.0801                                                                                                | 0.0906                                                                                                            | 0.0950                                                                                                            | 0.0676                                                                                                            | 0.0597                                                                                                            | 0.1255                                                                                                            | 0.1098                                                                                                            |
| R[I> 2σ(I)] <sup>a</sup>   | 0.0749                                                                                                               | 0.0529                                                                                                               | 0.0567                                                                                                | 0.0499                                                                                                | 0.0822                                                                                                | 0.1009                                                                                                | 0.0886                                                                                                            | 0.1200                                                                                                            | 0.0433                                                                                                            | 0.0404                                                                                                            | 0.1016                                                                                                            | 0.0890                                                                                                            |
| wR[I> 2σ(I)] <sup>b</sup>  | 0.2014                                                                                                               | 0.1654                                                                                                               | 0.1605                                                                                                | 0.1438                                                                                                | 0.2319                                                                                                | 0.2818                                                                                                | 0.2353                                                                                                            | 0.3102                                                                                                            | 0.1185                                                                                                            | 0.1155                                                                                                            | 0.2586                                                                                                            | 0.2336                                                                                                            |
| R(all data)                | 0.1162                                                                                                               | 0.0615                                                                                                               | 0.0778                                                                                                | 0.0659                                                                                                | 0.0938                                                                                                | 0.1167                                                                                                | 0.1058                                                                                                            | 0.1497                                                                                                            | 0.0566                                                                                                            | 0.0538                                                                                                            | 0.1373                                                                                                            | 0.1281                                                                                                            |
| wR(all data)               | 0.2528                                                                                                               | 0.1756                                                                                                               | 0.1782                                                                                                | 0.1568                                                                                                | 0.2455                                                                                                | 0.3035                                                                                                | 0.2524                                                                                                            | 0.3393                                                                                                            | 0.1243                                                                                                            | 0.1217                                                                                                            | 0.2797                                                                                                            | 0.2583                                                                                                            |
| GOF on F2                  | 1.004                                                                                                                | 1.110                                                                                                                | 0.923                                                                                                 | 1.027                                                                                                 | 1.125                                                                                                 | 1.155                                                                                                 | 1.022                                                                                                             | 1.114                                                                                                             | 1.016                                                                                                             | 0.951                                                                                                             | 1.023                                                                                                             | 1.030                                                                                                             |

$$^a R_1 = \Sigma ||F_o| - |F_c|| / \Sigma |F_o|; ^b wR_2 = [\Sigma w(|F_o|^2 - |F_c|^2) / \Sigma |w(F_o)^2|^{1/2}], \text{ where } w = 1/[\sigma^2(F_o^2) + (aP)^2 + bP]; P = (F_o^2 + 2F_c^2)/3.$$

Crystal structures details of compounds in the first group are shown in Figures S1–S4:

**Figure S1.** X-ray crystal structure of compound **1**: (a) an overall view of the coordination features and supramolecular assembly; (b) a 1D coordination polymer of  $\text{La}^{3+}$  cations and Q[7] molecules surrounded by the  $[\text{CuCl}_4]^{2-}$  anions; (c) coordination of the  $\text{La}^{3+}$  cations by the portal carbonyl oxygens of the Q[7] molecules and water molecules; (e) torsion of the four  $\text{La}^{3+}$  cations coordinated to a Q[7] molecule.

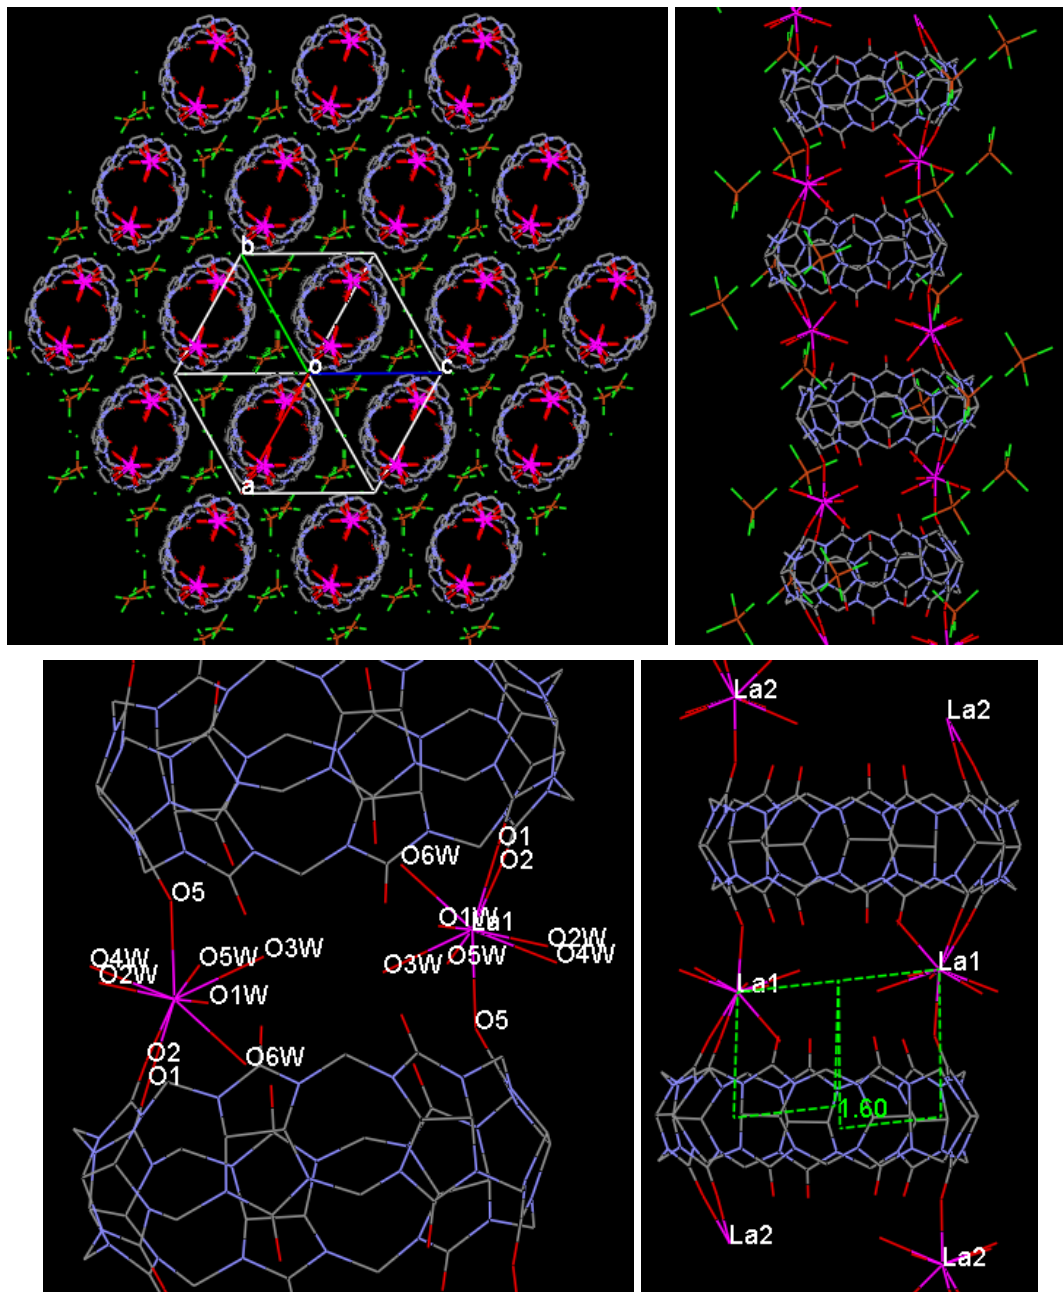

**Figure S2.** X-ray crystal structure of compound **2**: (a) an overall view of the coordination features and supramolecular assembly; (b) a 1D coordination polymer of Nd<sup>3+</sup> cations and Q[7] molecules surrounded by the [CuCl<sub>4</sub>]<sup>2-</sup> anions; (c) coordination of the Nd<sup>3+</sup> cations by the portal carbonyl oxygens of the Q[7] molecules and water molecules; (e) torsion of the four Nd<sup>3+</sup> cations coordinated to a Q[7] molecule.

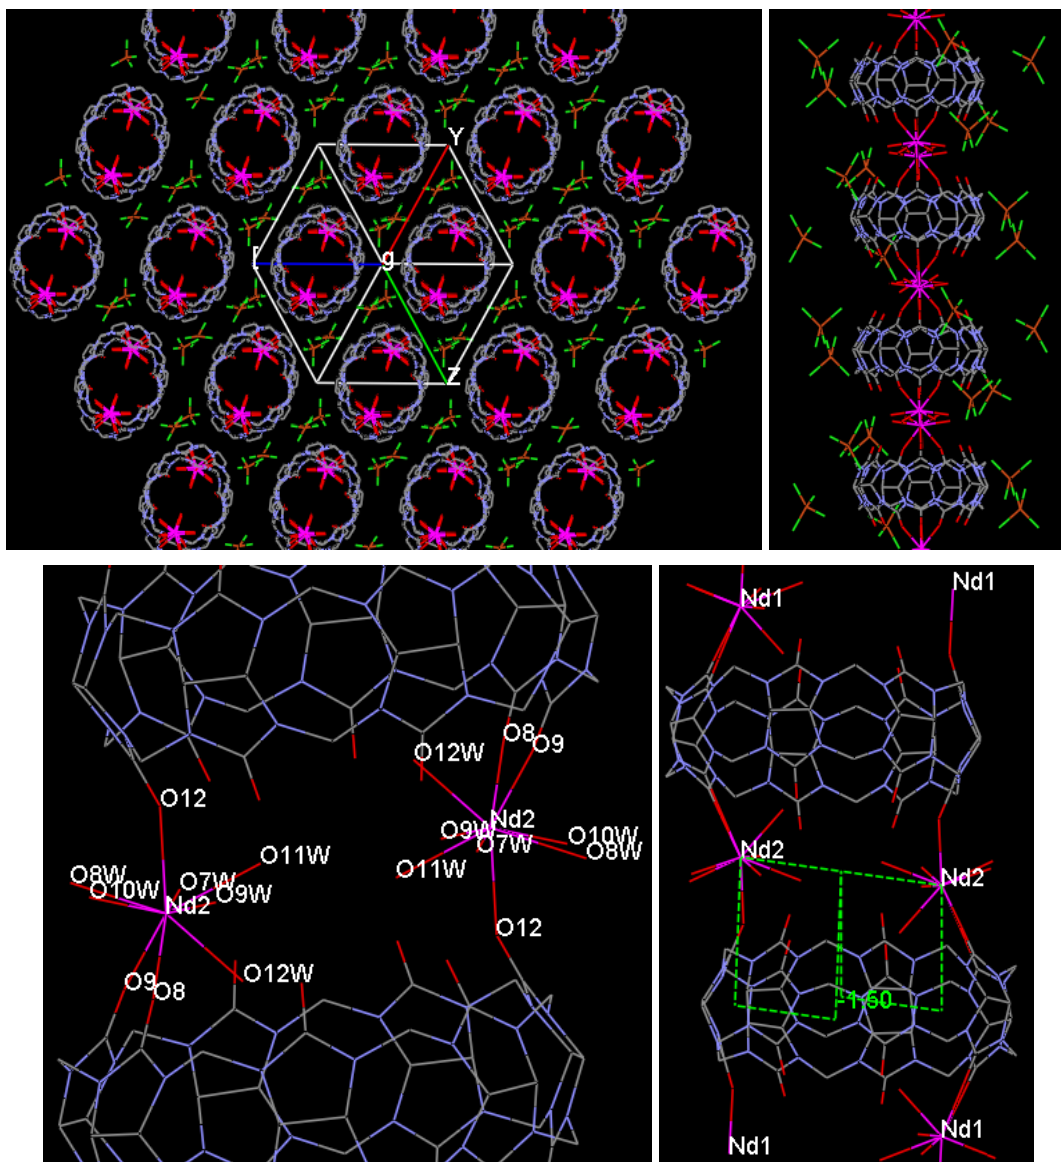





**Figure S4.** X-ray crystal structure of compound **4**: (a) an overall view of the coordination features and supramolecular assembly; (b) a 1D coordination polymer of  $\text{Ce}^{3+}$  cations and Q[7] molecules surrounded by the  $[\text{CoCl}_4]^{2-}$  anions; (c) coordination of the  $\text{Ce}^{3+}$  cations by the portal carbonyl oxygens of the Q[7] molecules and water molecules; (e) torsion of the four  $\text{Ce}^{3+}$  cations coordinated to a Q[7] molecule.

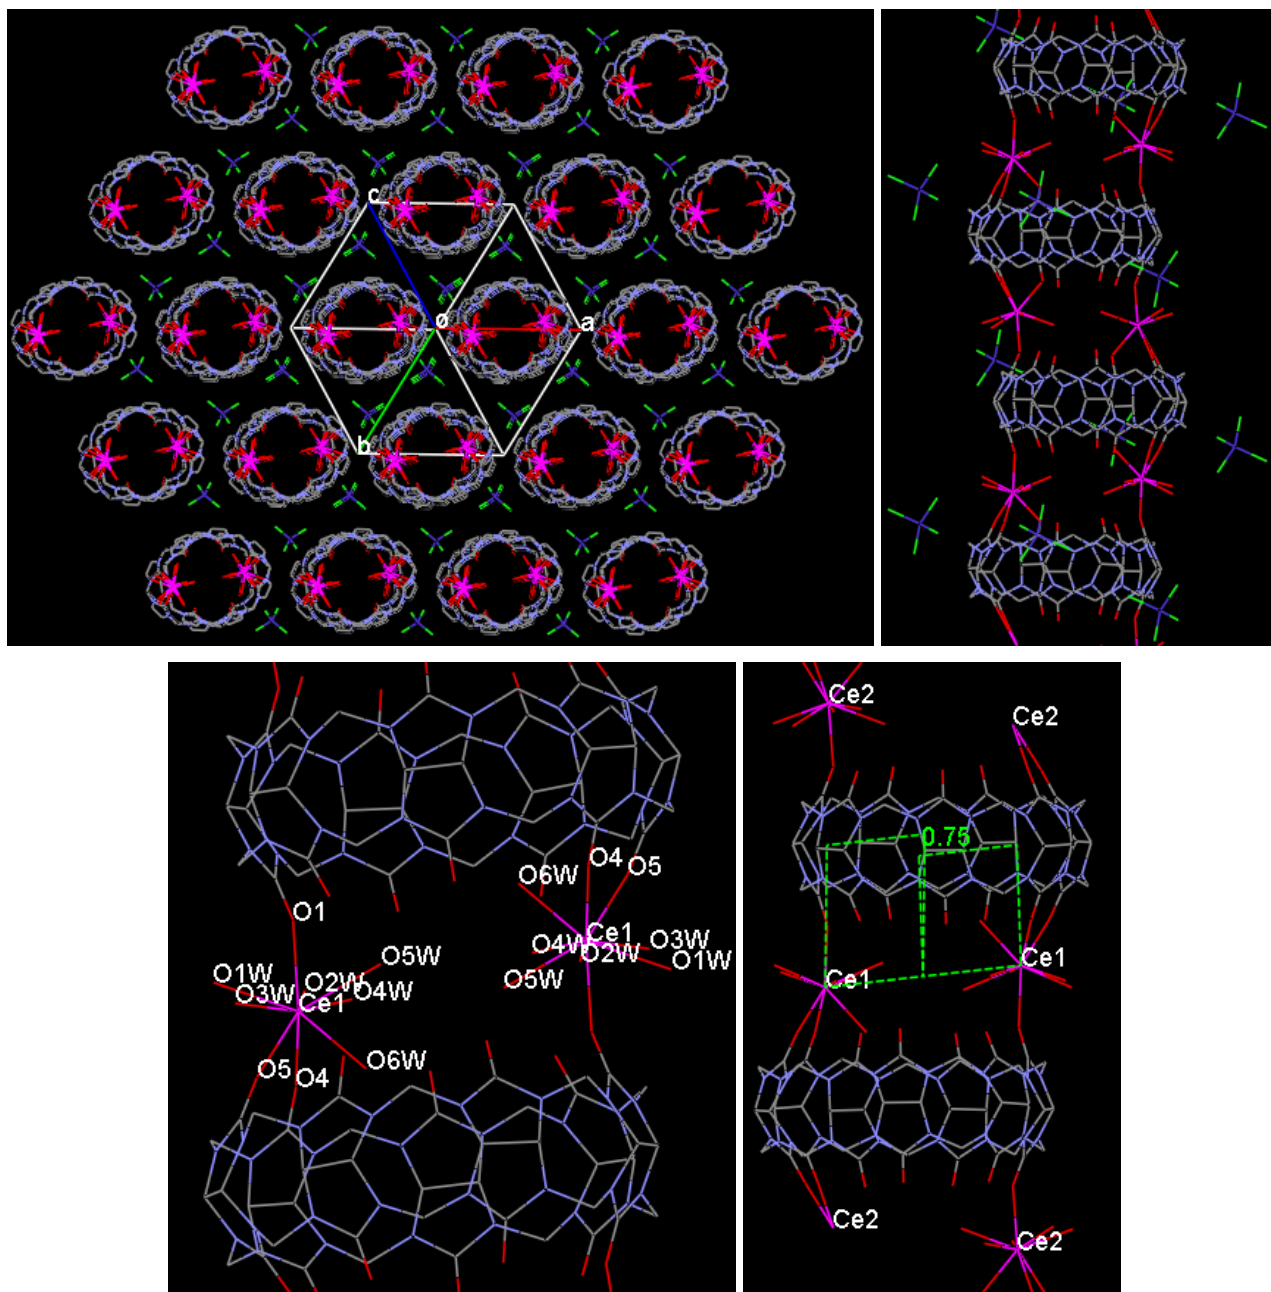

Crystal structures details of compounds in the second group are shown in Figures S5–S8:

**Figure S5.** X-ray crystal structure of compound **5**: (a) an overall view of the coordination features and supramolecular assembly; (b) a 1D coordination polymer of  $\text{Eu}^{3+}$  cations and Q[7] molecules surrounded by the  $[\text{CuCl}_4]^{2-}$  anions; (c) coordination of the  $\text{Eu}^{3+}$  cations by the portal carbonyl oxygens of the Q[7] molecules and water molecules; (e) torsion of the four  $\text{Eu}^{3+}$  cations coordinated to a Q[7] molecule.

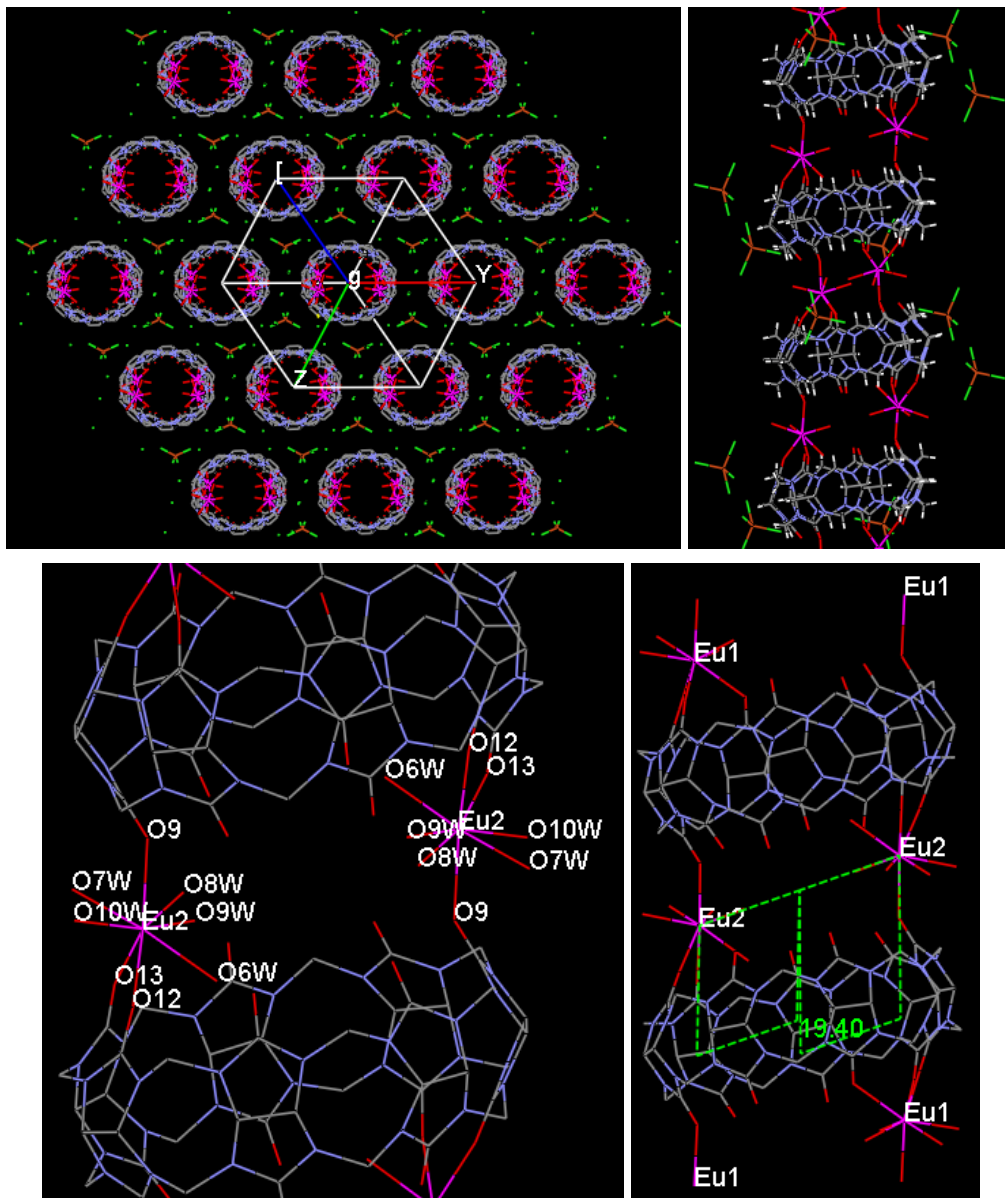

**Figure S6.** X-ray crystal structure of compound **6**: (a) an overall view of the coordination features and supramolecular assembly; (b) a 1D coordination polymer of  $\text{Gd}^{3+}$  cations and Q[7] molecules surrounded by the  $[\text{CuCl}_4]^{2-}$  anions; (c) coordination of the  $\text{Gd}^{3+}$  cations by the portal carbonyl oxygens of the Q[7] molecules and water molecules; (e) torsion of the four  $\text{Gd}^{3+}$  cations coordinated to a Q[7] molecule.

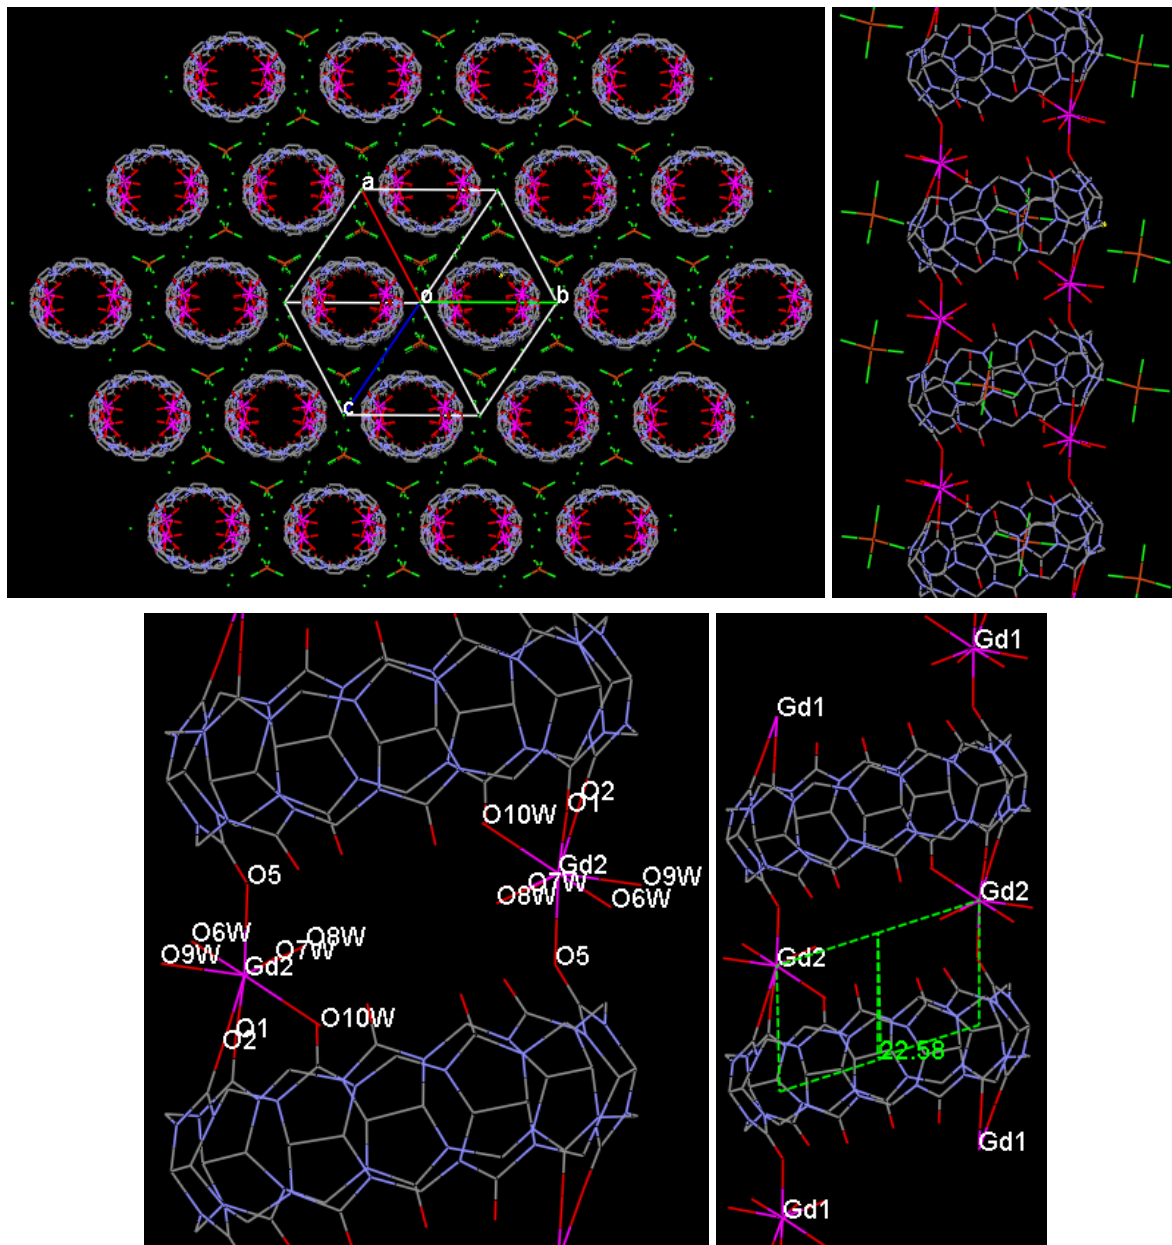



**Figure S7.** X-ray crystal structure of compound **7**: (a) an overall view of the coordination features and supramolecular assembly; (b) a 1D coordination polymer of Dy<sup>3+</sup> cations and Q[7] molecules surrounded by the [CoCl<sub>4</sub>]<sup>2-</sup> anions; (c) coordination of the Dy<sup>3+</sup> cations by the portal carbonyl oxygens of the Q[7] molecules and water molecules; (e) torsion of the four Dy<sup>3+</sup> cations coordinated to a Q[7] molecule.

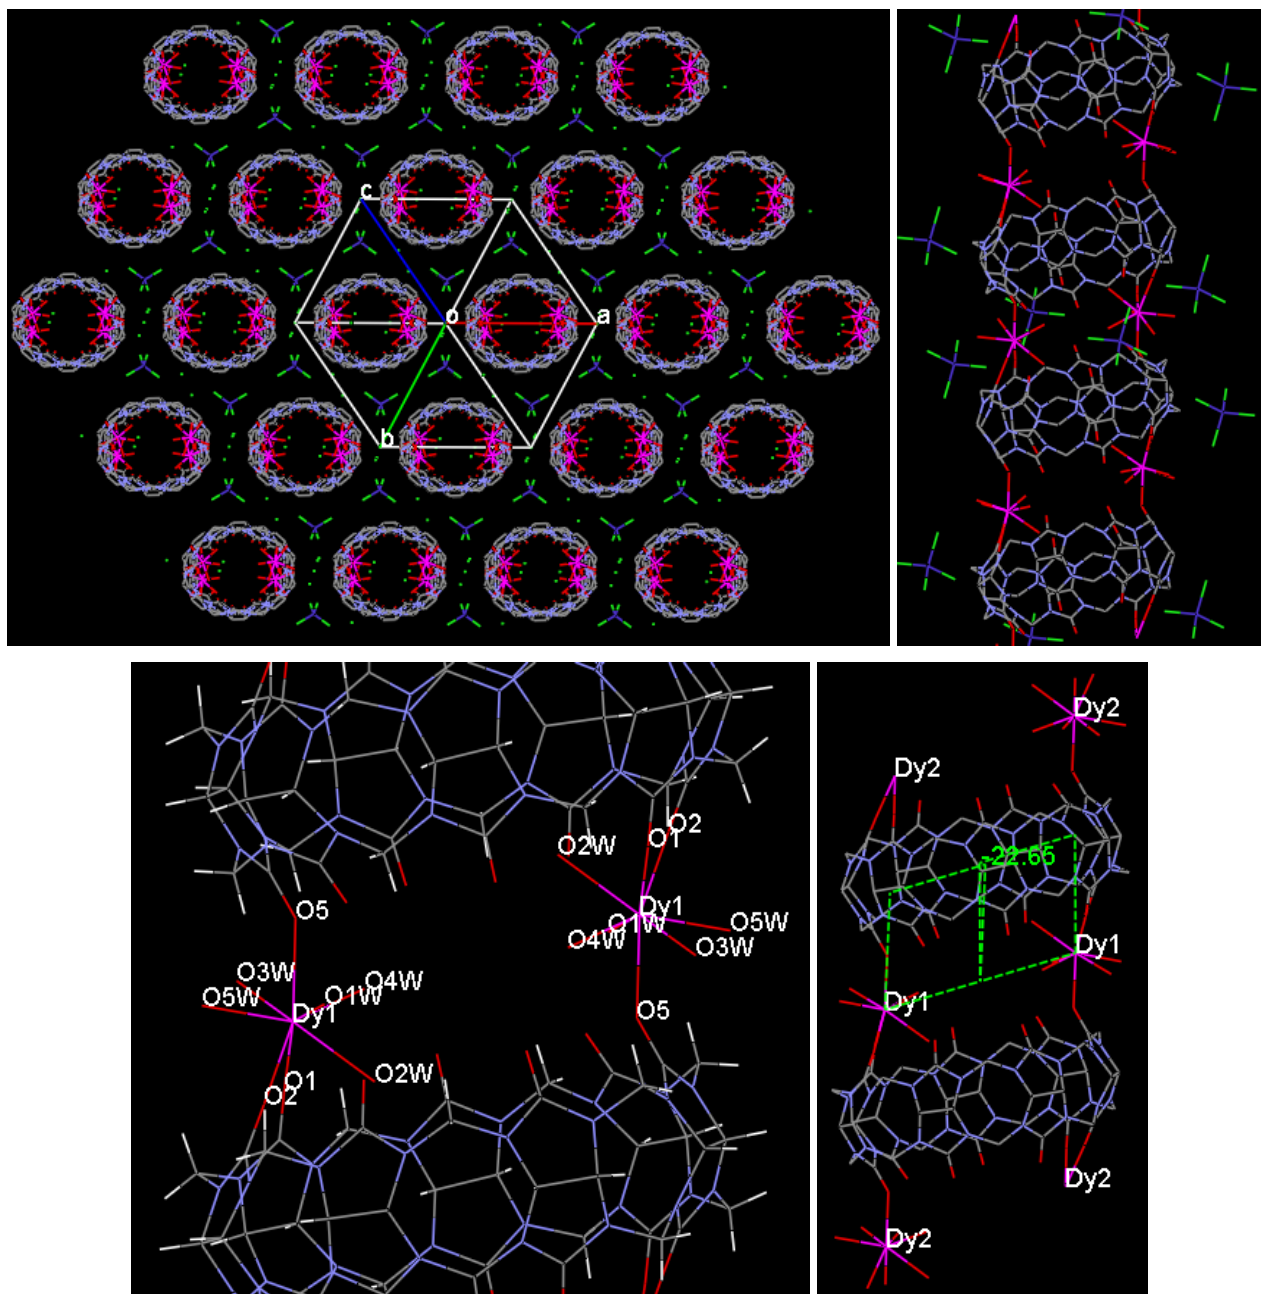

**Figure S8.** X-ray crystal structure of compound **8**: (a) an overall view of the coordination features and supramolecular assembly; (b) a 1D coordination polymer of  $\text{Er}^{3+}$  cations and Q[7] molecules surrounded by the  $[\text{CoCl}_4]^{2-}$  anions; (c) coordination of the  $\text{Er}^{3+}$  cations by the portal carbonyl oxygens of the Q[7] molecules and water molecules; (e) torsion of the four  $\text{Er}^{3+}$  cations coordinated to a Q[7] molecule.

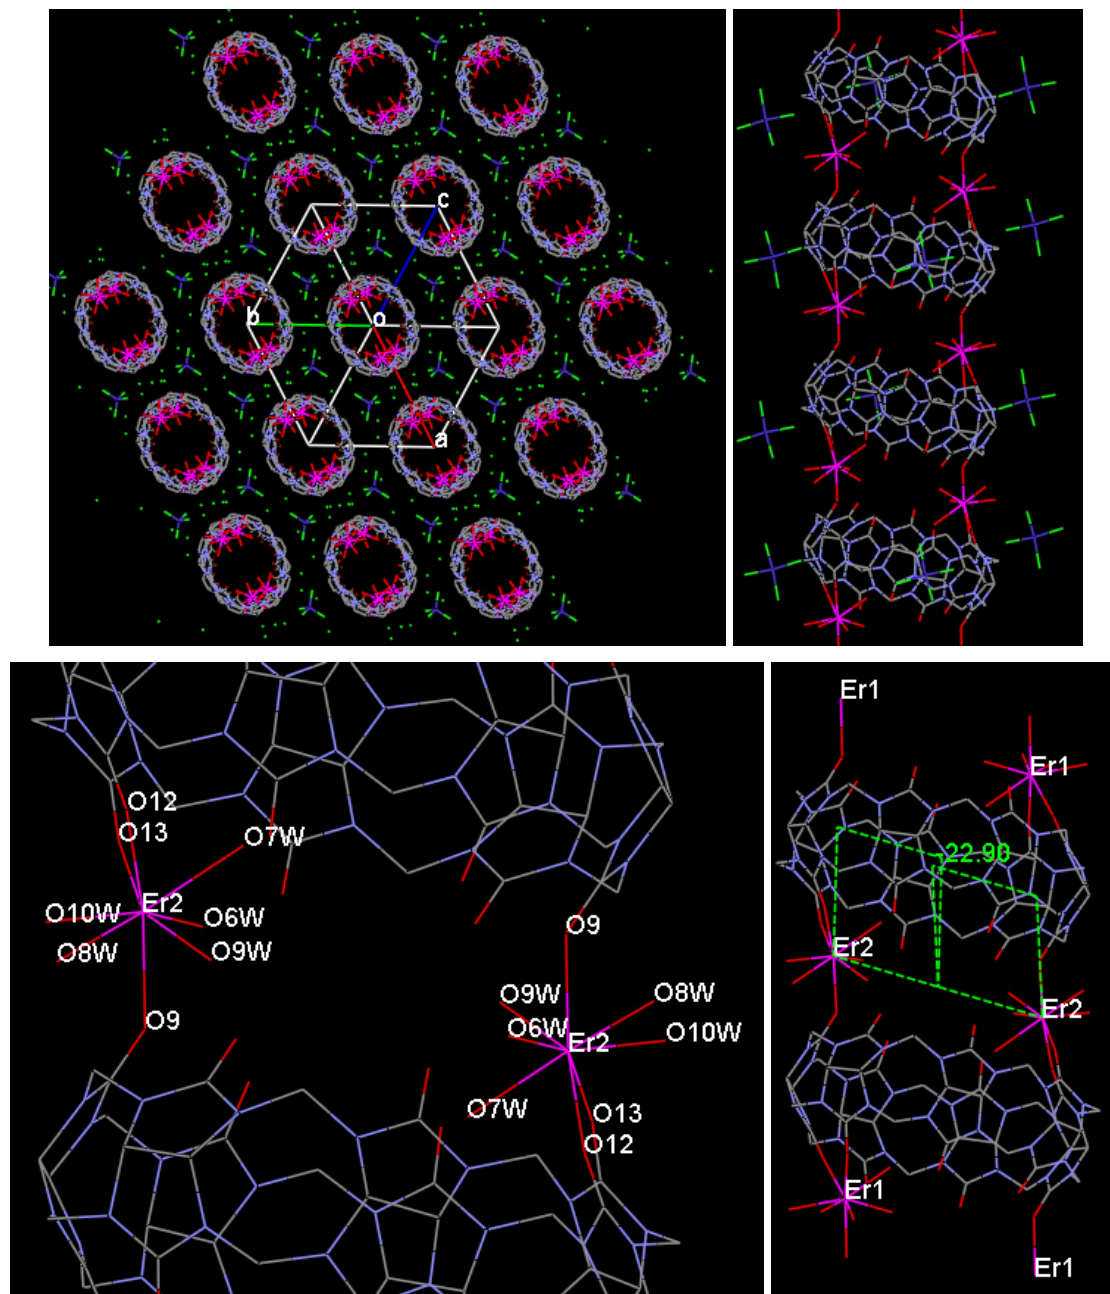

Crystal structures details of compounds in the third group are shown in Figures S9–S12:

**Figure S9.** X-ray crystal structure of compound **9**: (a) an overall view of the coordination features and supramolecular assembly; (b) a 1D coordination polymer of  $\text{Eu}^{3+}$  cations and Q[7] molecules surrounded by the  $[\text{CoCl}_4]^{2-}$  anions; (c) coordination of the  $\text{Eu}^{3+}$  cations by the portal carbonyl oxygens of the Q[7] molecules and water molecules; (e) torsion of the four  $\text{Eu}^{3+}$  cations coordinated to a Q[7] molecule.

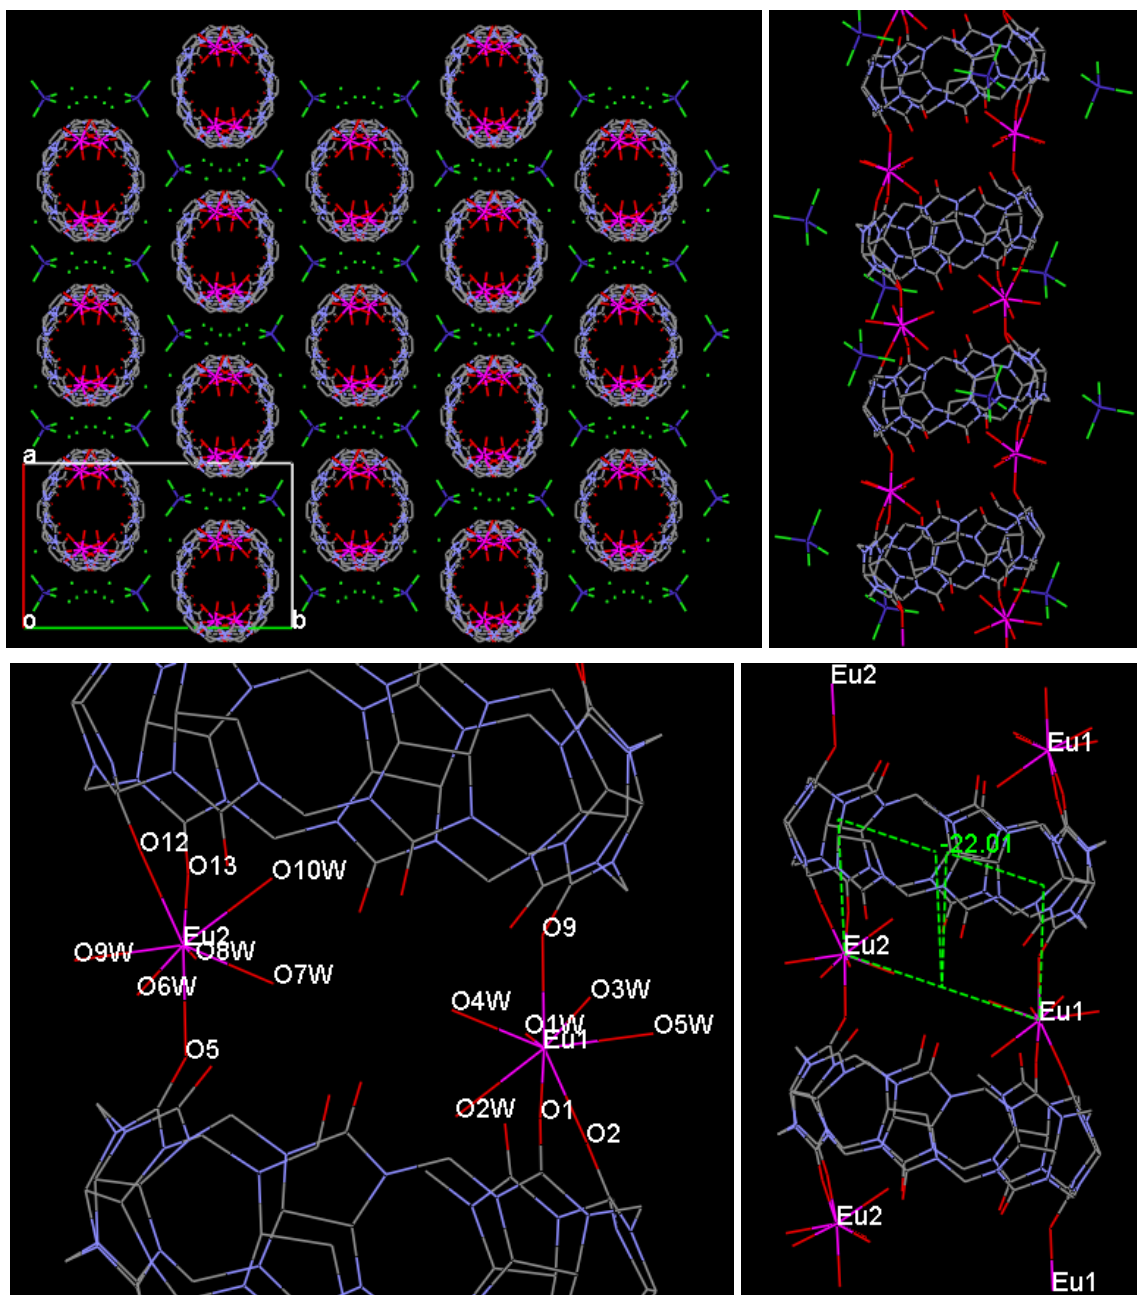

**Figure S10.** X-ray crystal structure of compound **10**: (a) an overall view of the coordination features and supramolecular assembly; (b) a 1D coordination polymer of  $\text{Gd}^{3+}$  cations and Q[7] molecules surrounded by the  $[\text{CoCl}_4]^{2-}$  anions; (c) coordination of the  $\text{Gd}^{3+}$  cations by the portal carbonyl oxygens of the Q[7] molecules and water molecules; (e) torsion of the four  $\text{Gd}^{3+}$  cations coordinated to a Q[7] molecule.

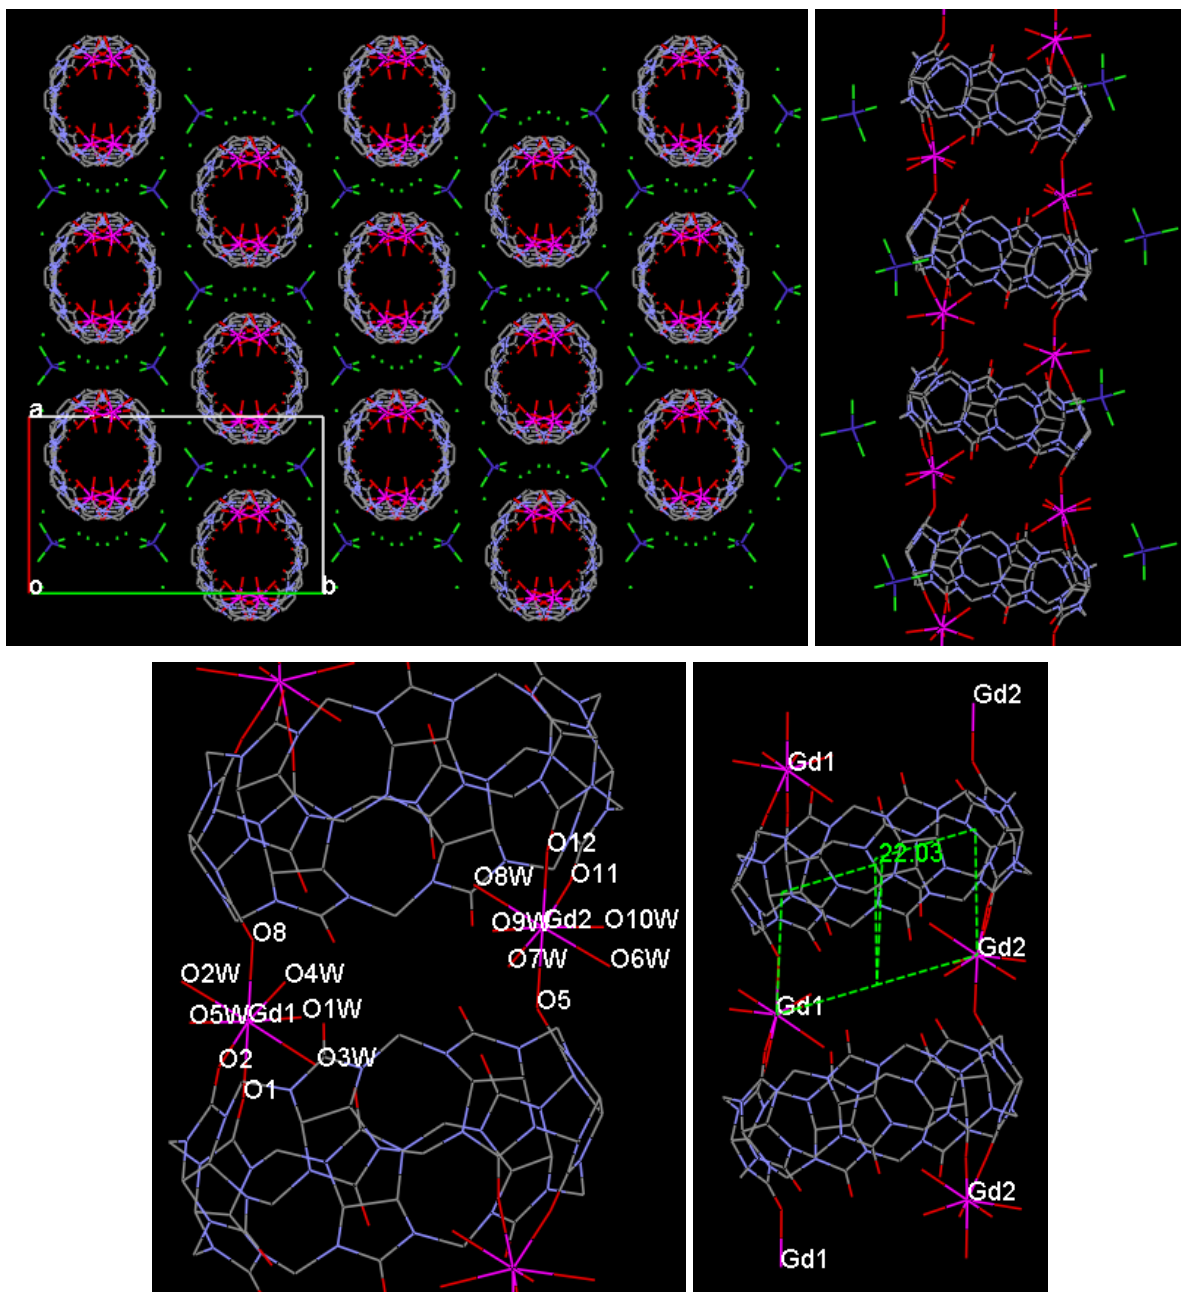



**Figure S11.** X-ray crystal structure of compound **11**: (a) an overall view of the coordination features and supramolecular assembly; (b) a 1D coordination polymer of  $\text{Dy}^{3+}$  cations and Q[7] molecules surrounded by the  $[\text{CuCl}_4]^{2-}$  anions; (c) coordination of the  $\text{Dy}^{3+}$  cations by the portal carbonyl oxygens of the Q[7] molecules and water molecules; (e) torsion of the four  $\text{Dy}^{3+}$  cations coordinated to a Q[7] molecule.

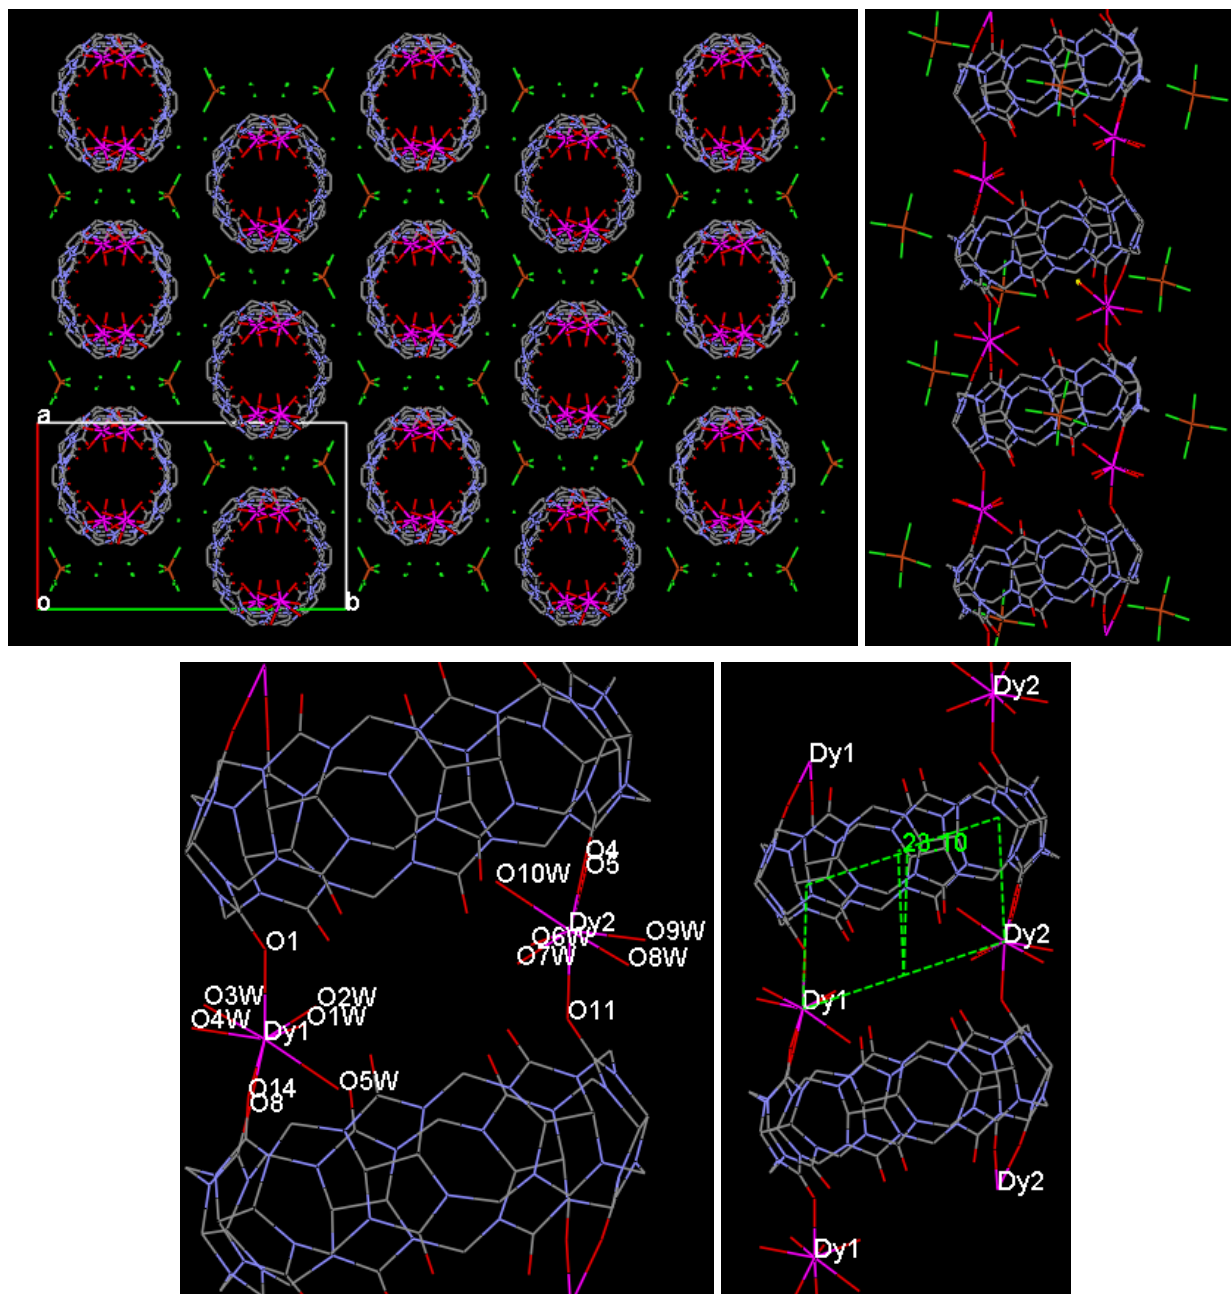



**Figure S12.** X-ray crystal structure of compound **12**: (a) an overall view of the coordination features and supramolecular assembly; (b) a 1D coordination polymer of  $\text{Ho}^{3+}$  cations and Q[7] molecules surrounded by the  $[\text{CoCl}_4]^{2-}$  anions; (c) coordination of the  $\text{Ho}^{3+}$  cations by the portal carbonyl oxygens of the Q[7] molecules and water molecules; (e) torsion of the four  $\text{Ho}^{3+}$  cations coordinated to a Q[7] molecule.

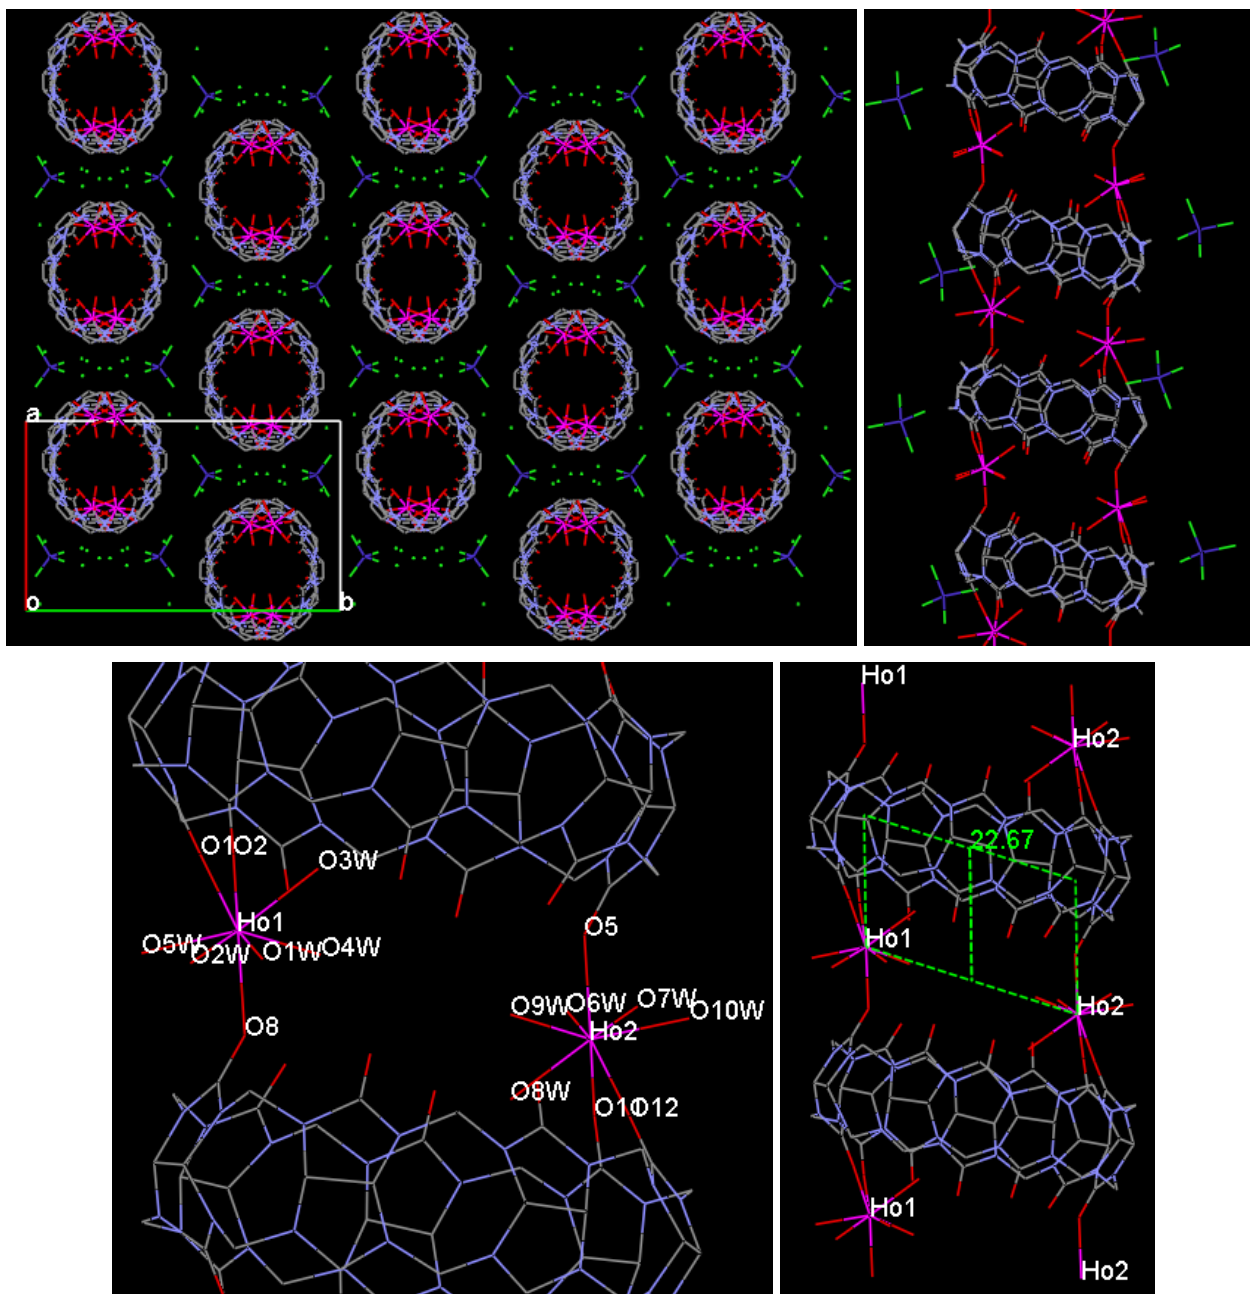

© 2013 by the authors; licensee MDPI, Basel, Switzerland. This article is an open access article distributed under the terms and conditions of the Creative Commons Attribution license (<http://creativecommons.org/licenses/by/3.0/>).
